# Supplementary material for: Sustainable solvent extraction of gold and other metals with biomass chemicals
Source: Royal Society of Chemistry journal article supplement (doi:10.1039/d3su00078h), 2024-01-01
Supplement: d3su00078h2.pdf [file d3su00078h2.pdf]

Molecular mechanics results

|                                                   |         |
|---------------------------------------------------|---------|
| FeCl <sub>3</sub> bis tetraethyl malonamide       | page 2  |
| FeCl <sub>3</sub> bis dimethyldipropyl malonamide | page 6  |
| AuCl <sub>3</sub> bis tetraethyl malonamide       | page 11 |
| AuCl <sub>3</sub> bis dimethyldipropyl malonamide | page 14 |
| Pictures of the iron complexes                    | page 18 |
| Pictures of the gold complexes                    | page 19 |

FeCl3 bis tetraethyl malonamide

REMARK This PDB file was created by CS Chem3D.

|        |    |    |   |        |        |        |    |
|--------|----|----|---|--------|--------|--------|----|
| HETATM | 1  | N  | 1 | 0.438  | -2.610 | 0.325  | N  |
| HETATM | 2  | O  | 1 | 0.078  | -0.456 | -0.153 | O  |
| HETATM | 3  | O  | 1 | -2.895 | 0.114  | -1.067 | O  |
| HETATM | 4  | C  | 1 | -5.339 | -1.008 | -1.543 | C  |
| HETATM | 5  | N  | 1 | -4.108 | -1.768 | -1.293 | N  |
| HETATM | 6  | C  | 1 | -2.919 | -1.116 | -0.981 | C  |
| HETATM | 7  | C  | 1 | -0.395 | -1.588 | -0.115 | C  |
| HETATM | 8  | C  | 1 | -1.788 | -2.044 | -0.536 | C  |
| HETATM | 9  | C  | 1 | 1.821  | -2.329 | 0.731  | C  |
| HETATM | 10 | C  | 1 | 0.072  | -4.033 | 0.379  | C  |
| HETATM | 11 | C  | 1 | 2.743  | -2.041 | -0.464 | C  |
| HETATM | 12 | C  | 1 | 0.472  | -4.781 | -0.900 | C  |
| HETATM | 13 | C  | 1 | -4.261 | -3.226 | -1.420 | C  |
| HETATM | 14 | C  | 1 | -4.674 | -3.936 | -0.124 | C  |
| HETATM | 15 | C  | 1 | -6.044 | -0.638 | -0.231 | C  |
| HETATM | 16 | Fe | 1 | -1.200 | 0.762  | -0.678 | FE |
| HETATM | 17 | O  | 1 | -1.942 | 0.203  | 0.926  | O  |
| HETATM | 18 | O  | 1 | -1.909 | 2.280  | -1.442 | O  |
| HETATM | 19 | Cl | 1 | -0.396 | 2.124  | 0.846  | CL |
| HETATM | 20 | Cl | 1 | 0.604  | 1.652  | -1.579 | CL |
| HETATM | 21 | Cl | 1 | -1.051 | -0.113 | -2.687 | CL |
| HETATM | 22 | C  | 1 | -2.932 | 2.619  | -0.854 | C  |
| HETATM | 23 | C  | 1 | -2.807 | 0.999  | 1.303  | C  |
| HETATM | 24 | C  | 1 | -3.391 | 2.187  | 0.536  | C  |
| HETATM | 25 | N  | 1 | -3.358 | 0.806  | 2.562  | N  |
| HETATM | 26 | N  | 1 | -3.742 | 3.565  | -1.466 | N  |
| HETATM | 27 | C  | 1 | -4.984 | 4.105  | -0.903 | C  |
| HETATM | 28 | C  | 1 | -3.406 | 4.110  | -2.784 | C  |
| HETATM | 29 | C  | 1 | -2.992 | -0.351 | 3.383  | C  |
| HETATM | 30 | C  | 1 | -4.316 | 1.707  | 3.211  | C  |
| HETATM | 31 | C  | 1 | -3.590 | 2.783  | 4.031  | C  |
| HETATM | 32 | C  | 1 | -6.202 | 3.299  | -1.373 | C  |
| HETATM | 33 | C  | 1 | -2.355 | 5.221  | -2.665 | C  |
| HETATM | 34 | C  | 1 | -3.868 | -1.554 | 3.012  | C  |
| HETATM | 35 | H  | 1 | -2.214 | -2.553 | 0.356  | H  |
| HETATM | 36 | H  | 1 | -1.598 | -2.757 | -1.369 | H  |
| HETATM | 37 | H  | 1 | -5.118 | -0.085 | -2.129 | H  |
| HETATM | 38 | H  | 1 | -6.055 | -1.573 | -2.182 | H  |
| HETATM | 39 | H  | 1 | 1.838  | -1.470 | 1.442  | H  |
| HETATM | 40 | H  | 1 | 2.259  | -3.179 | 1.303  | H  |
| HETATM | 41 | H  | 1 | 0.556  | -4.529 | 1.252  | H  |
| HETATM | 42 | H  | 1 | -1.008 | -4.193 | 0.583  | H  |
| HETATM | 43 | H  | 1 | 3.787  | -1.858 | -0.119 | H  |
| HETATM | 44 | H  | 1 | 2.774  | -2.895 | -1.175 | H  |
| HETATM | 45 | H  | 1 | 2.431  | -1.142 | -1.039 | H  |
| HETATM | 46 | H  | 1 | 0.093  | -5.829 | -0.883 | H  |
| HETATM | 47 | H  | 1 | 0.064  | -4.290 | -1.811 | H  |
| HETATM | 48 | H  | 1 | 1.578  | -4.838 | -1.009 | H  |

|         |    |    |    |        |        |        |    |    |
|---------|----|----|----|--------|--------|--------|----|----|
| HETATM  | 49 | H  | 1  | -5.026 | -3.465 | -2.195 | H  |    |
| HETATM  | 50 | H  | 1  | -3.350 | -3.702 | -1.841 | H  |    |
| HETATM  | 51 | H  | 1  | -4.764 | -5.034 | -0.292 | H  |    |
| HETATM  | 52 | H  | 1  | -3.937 | -3.799 | 0.695  | H  |    |
| HETATM  | 53 | H  | 1  | -5.662 | -3.585 | 0.244  | H  |    |
| HETATM  | 54 | H  | 1  | -6.916 | 0.029  | -0.418 | H  |    |
| HETATM  | 55 | H  | 1  | -6.433 | -1.535 | 0.299  | H  |    |
| HETATM  | 56 | H  | 1  | -5.360 | -0.116 | 0.472  | H  |    |
| HETATM  | 57 | H  | 1  | -3.250 | 3.090  | 1.174  | H  |    |
| HETATM  | 58 | H  | 1  | -4.471 | 1.940  | 0.431  | H  |    |
| HETATM  | 59 | H  | 1  | -4.955 | 4.168  | 0.207  | H  |    |
| HETATM  | 60 | H  | 1  | -5.112 | 5.168  | -1.216 | H  |    |
| HETATM  | 61 | H  | 1  | -3.049 | 3.304  | -3.466 | H  |    |
| HETATM  | 62 | H  | 1  | -4.310 | 4.522  | -3.291 | H  |    |
| HETATM  | 63 | H  | 1  | -1.913 | -0.605 | 3.267  | H  |    |
| HETATM  | 64 | H  | 1  | -3.112 | -0.130 | 4.469  | H  |    |
| HETATM  | 65 | H  | 1  | -5.023 | 2.173  | 2.491  | H  |    |
| HETATM  | 66 | H  | 1  | -4.985 | 1.129  | 3.890  | H  |    |
| HETATM  | 67 | H  | 1  | -4.319 | 3.469  | 4.521  | H  |    |
| HETATM  | 68 | H  | 1  | -2.965 | 2.328  | 4.833  | H  |    |
| HETATM  | 69 | H  | 1  | -2.918 | 3.404  | 3.398  | H  |    |
| HETATM  | 70 | H  | 1  | -7.142 | 3.701  | -0.929 | H  |    |
| HETATM  | 71 | H  | 1  | -6.311 | 3.333  | -2.481 | H  |    |
| HETATM  | 72 | H  | 1  | -6.124 | 2.229  | -1.082 | H  |    |
| HETATM  | 73 | H  | 1  | -2.115 | 5.651  | -3.665 | H  |    |
| HETATM  | 74 | H  | 1  | -2.721 | 6.050  | -2.018 | H  |    |
| HETATM  | 75 | H  | 1  | -1.403 | 4.844  | -2.228 | H  |    |
| HETATM  | 76 | H  | 1  | -3.574 | -2.461 | 3.589  | H  |    |
| HETATM  | 77 | H  | 1  | -4.943 | -1.352 | 3.218  | H  |    |
| HETATM  | 78 | H  | 1  | -3.777 | -1.795 | 1.931  | H  |    |
| CONNECT | 1  | 7  | 9  | 10     |        |        |    |    |
| CONNECT | 2  | 7  | 16 |        |        |        |    |    |
| CONNECT | 3  | 6  | 16 |        |        |        |    |    |
| CONNECT | 4  | 5  | 15 | 37     | 38     |        |    |    |
| CONNECT | 5  | 4  | 6  | 13     |        |        |    |    |
| CONNECT | 6  | 3  | 5  | 8      |        |        |    |    |
| CONNECT | 7  | 1  | 2  | 8      |        |        |    |    |
| CONNECT | 8  | 6  | 7  | 35     | 36     |        |    |    |
| CONNECT | 9  | 1  | 11 | 39     | 40     |        |    |    |
| CONNECT | 10 | 1  | 12 | 41     | 42     |        |    |    |
| CONNECT | 11 | 9  | 43 | 44     | 45     |        |    |    |
| CONNECT | 12 | 10 | 46 | 47     | 48     |        |    |    |
| CONNECT | 13 | 5  | 14 | 49     | 50     |        |    |    |
| CONNECT | 14 | 13 | 51 | 52     | 53     |        |    |    |
| CONNECT | 15 | 4  | 54 | 55     | 56     |        |    |    |
| CONNECT | 16 | 3  | 2  | 17     | 18     | 19     | 20 | 21 |
| CONNECT | 17 | 16 | 23 |        |        |        |    |    |
| CONNECT | 18 | 16 | 22 |        |        |        |    |    |
| CONNECT | 19 | 16 |    |        |        |        |    |    |
| CONNECT | 20 | 16 |    |        |        |        |    |    |
| CONNECT | 21 | 16 |    |        |        |        |    |    |

CONNECT 22 18 24 26  
CONNECT 23 17 24 25  
CONNECT 24 22 23 57 58  
CONNECT 25 23 29 30  
CONNECT 26 22 27 28  
CONNECT 27 26 32 59 60  
CONNECT 28 26 33 61 62  
CONNECT 29 25 34 63 64  
CONNECT 30 25 31 65 66  
CONNECT 31 30 67 68 69  
CONNECT 32 27 70 71 72  
CONNECT 33 28 73 74 75  
CONNECT 34 29 76 77 78  
CONNECT 35 8  
CONNECT 36 8  
CONNECT 37 4  
CONNECT 38 4  
CONNECT 39 9  
CONNECT 40 9  
CONNECT 41 10  
CONNECT 42 10  
CONNECT 43 11  
CONNECT 44 11  
CONNECT 45 11  
CONNECT 46 12  
CONNECT 47 12  
CONNECT 48 12  
CONNECT 49 13  
CONNECT 50 13  
CONNECT 51 14  
CONNECT 52 14  
CONNECT 53 14  
CONNECT 54 15  
CONNECT 55 15  
CONNECT 56 15  
CONNECT 57 24  
CONNECT 58 24  
CONNECT 59 27  
CONNECT 60 27  
CONNECT 61 28  
CONNECT 62 28  
CONNECT 63 29  
CONNECT 64 29  
CONNECT 65 30  
CONNECT 66 30  
CONNECT 67 31  
CONNECT 68 31  
CONNECT 69 31  
CONNECT 70 32  
CONNECT 71 32  
CONNECT 72 32

CONECT 73 33  
CONECT 74 33  
CONECT 75 33  
CONECT 76 34  
CONECT 77 34  
CONECT 78 34  
END

FeCl3 bis dimethyldipropyl malonamide

REMARK This PDB file was created by CS Chem3D.

|        |    |    |   |        |        |        |    |
|--------|----|----|---|--------|--------|--------|----|
| HETATM | 1  | C  | 1 | -1.599 | -2.382 | -0.440 | C  |
| HETATM | 2  | C  | 1 | -0.172 | -2.062 | 0.007  | C  |
| HETATM | 3  | C  | 1 | -2.516 | -1.381 | -1.142 | C  |
| HETATM | 4  | N  | 1 | -3.767 | -1.877 | -1.481 | N  |
| HETATM | 5  | C  | 1 | -4.709 | -1.047 | -2.232 | C  |
| HETATM | 6  | O  | 1 | -2.285 | -0.208 | -1.439 | O  |
| HETATM | 7  | O  | 1 | 0.518  | -1.100 | -0.319 | O  |
| HETATM | 8  | N  | 1 | 0.395  | -3.030 | 0.822  | N  |
| HETATM | 9  | C  | 1 | -0.299 | -4.241 | 1.260  | C  |
| HETATM | 10 | C  | 1 | 1.771  | -2.919 | 1.313  | C  |
| HETATM | 11 | C  | 1 | 2.756  | -3.726 | 0.449  | C  |
| HETATM | 12 | C  | 1 | -4.313 | -3.177 | -1.076 | C  |
| HETATM | 13 | C  | 1 | -5.400 | -3.030 | 0.006  | C  |
| HETATM | 14 | Fe | 1 | -0.530 | 0.233  | -1.037 | FE |
| HETATM | 15 | O  | 1 | -1.379 | 0.022  | 0.597  | O  |
| HETATM | 16 | O  | 1 | -0.998 | 1.705  | -2.041 | O  |
| HETATM | 17 | Cl | 1 | 0.408  | 1.687  | 0.316  | CL |
| HETATM | 18 | Cl | 1 | 1.413  | 0.715  | -1.955 | CL |
| HETATM | 19 | Cl | 1 | -0.441 | -0.968 | -2.874 | CL |
| HETATM | 20 | C  | 1 | -1.953 | 2.289  | -1.532 | C  |
| HETATM | 21 | C  | 1 | -2.170 | 0.943  | 0.796  | C  |
| HETATM | 22 | C  | 1 | -2.573 | 2.072  | -0.152 | C  |
| HETATM | 23 | N  | 1 | -2.812 | 0.978  | 2.025  | N  |
| HETATM | 24 | N  | 1 | -2.540 | 3.301  | -2.279 | N  |
| HETATM | 25 | C  | 1 | -2.084 | 3.560  | -3.646 | C  |
| HETATM | 26 | C  | 1 | -3.598 | 4.202  | -1.806 | C  |
| HETATM | 27 | C  | 1 | -2.516 | -0.018 | 3.060  | C  |
| HETATM | 28 | C  | 1 | -3.800 | 1.989  | 2.401  | C  |
| HETATM | 29 | C  | 1 | -3.056 | 5.430  | -1.052 | C  |
| HETATM | 30 | C  | 1 | -1.189 | 0.265  | 3.785  | C  |
| HETATM | 31 | C  | 1 | -2.165 | 6.340  | -1.907 | C  |
| HETATM | 32 | C  | 1 | -1.149 | 1.651  | 4.441  | C  |
| HETATM | 33 | C  | 1 | -4.897 | -2.340 | 1.280  | C  |
| HETATM | 34 | C  | 1 | 2.840  | -3.232 | -1.000 | C  |
| HETATM | 35 | H  | 1 | -2.151 | -2.664 | 0.486  | H  |
| HETATM | 36 | H  | 1 | -1.493 | -3.253 | -1.130 | H  |
| HETATM | 37 | H  | 1 | -4.235 | -0.663 | -3.164 | H  |
| HETATM | 38 | H  | 1 | -5.618 | -1.603 | -2.550 | H  |
| HETATM | 39 | H  | 1 | -5.038 | -0.184 | -1.609 | H  |
| HETATM | 40 | H  | 1 | -1.109 | -3.987 | 1.981  | H  |
| HETATM | 41 | H  | 1 | -0.717 | -4.803 | 0.396  | H  |
| HETATM | 42 | H  | 1 | 0.378  | -4.953 | 1.782  | H  |
| HETATM | 43 | H  | 1 | 2.107  | -1.860 | 1.378  | H  |
| HETATM | 44 | H  | 1 | 1.822  | -3.277 | 2.369  | H  |
| HETATM | 45 | H  | 1 | 3.773  | -3.663 | 0.908  | H  |
| HETATM | 46 | H  | 1 | 2.469  | -4.804 | 0.452  | H  |
| HETATM | 47 | H  | 1 | -4.748 | -3.681 | -1.971 | H  |
| HETATM | 48 | H  | 1 | -3.545 | -3.894 | -0.720 | H  |

|         |    |    |    |        |        |        |    |    |  |   |
|---------|----|----|----|--------|--------|--------|----|----|--|---|
| HETATM  | 49 | H  | 1  | -5.790 | -4.042 | 0.272  |    |    |  | H |
| HETATM  | 50 | H  | 1  | -6.267 | -2.455 | -0.396 |    |    |  | H |
| HETATM  | 51 | H  | 1  | -2.396 | 3.023  | 0.398  |    |    |  | H |
| HETATM  | 52 | H  | 1  | -3.662 | 1.901  | -0.319 |    |    |  | H |
| HETATM  | 53 | H  | 1  | -2.286 | 2.671  | -4.287 |    |    |  | H |
| HETATM  | 54 | H  | 1  | -2.589 | 4.427  | -4.124 |    |    |  | H |
| HETATM  | 55 | H  | 1  | -0.992 | 3.776  | -3.662 |    |    |  | H |
| HETATM  | 56 | H  | 1  | -4.216 | 4.558  | -2.662 |    |    |  | H |
| HETATM  | 57 | H  | 1  | -4.343 | 3.669  | -1.178 |    |    |  | H |
| HETATM  | 58 | H  | 1  | -3.336 | -0.083 | 3.811  |    |    |  | H |
| HETATM  | 59 | H  | 1  | -2.482 | -1.038 | 2.611  |    |    |  | H |
| HETATM  | 60 | H  | 1  | -4.690 | 1.934  | 1.735  |    |    |  | H |
| HETATM  | 61 | H  | 1  | -4.178 | 1.862  | 3.439  |    |    |  | H |
| HETATM  | 62 | H  | 1  | -3.364 | 3.012  | 2.368  |    |    |  | H |
| HETATM  | 63 | H  | 1  | -3.922 | 6.031  | -0.682 |    |    |  | H |
| HETATM  | 64 | H  | 1  | -2.484 | 5.116  | -0.149 |    |    |  | H |
| HETATM  | 65 | H  | 1  | -1.034 | -0.513 | 4.572  |    |    |  | H |
| HETATM  | 66 | H  | 1  | -0.331 | 0.171  | 3.079  |    |    |  | H |
| HETATM  | 67 | H  | 1  | -1.868 | 7.252  | -1.340 |    |    |  | H |
| HETATM  | 68 | H  | 1  | -1.227 | 5.823  | -2.209 |    |    |  | H |
| HETATM  | 69 | H  | 1  | -2.695 | 6.675  | -2.827 |    |    |  | H |
| HETATM  | 70 | H  | 1  | -0.205 | 1.792  | 5.016  |    |    |  | H |
| HETATM  | 71 | H  | 1  | -1.196 | 2.461  | 3.679  |    |    |  | H |
| HETATM  | 72 | H  | 1  | -2.000 | 1.786  | 5.147  |    |    |  | H |
| HETATM  | 73 | H  | 1  | -5.713 | -2.245 | 2.033  |    |    |  | H |
| HETATM  | 74 | H  | 1  | -4.525 | -1.313 | 1.065  |    |    |  | H |
| HETATM  | 75 | H  | 1  | -4.074 | -2.921 | 1.755  |    |    |  | H |
| HETATM  | 76 | H  | 1  | 3.602  | -3.808 | -1.574 |    |    |  | H |
| HETATM  | 77 | H  | 1  | 1.868  | -3.353 | -1.530 |    |    |  | H |
| HETATM  | 78 | H  | 1  | 3.130  | -2.157 | -1.043 |    |    |  | H |
| CONNECT | 1  | 2  | 3  | 35     | 36     |        |    |    |  |   |
| CONNECT | 2  | 1  | 7  | 8      |        |        |    |    |  |   |
| CONNECT | 3  | 1  | 4  | 6      |        |        |    |    |  |   |
| CONNECT | 4  | 3  | 5  | 12     |        |        |    |    |  |   |
| CONNECT | 5  | 4  | 37 | 38     | 39     |        |    |    |  |   |
| CONNECT | 6  | 3  | 14 |        |        |        |    |    |  |   |
| CONNECT | 7  | 2  | 14 |        |        |        |    |    |  |   |
| CONNECT | 8  | 2  | 9  | 10     |        |        |    |    |  |   |
| CONNECT | 9  | 8  | 40 | 41     | 42     |        |    |    |  |   |
| CONNECT | 10 | 8  | 11 | 43     | 44     |        |    |    |  |   |
| CONNECT | 11 | 10 | 34 | 45     | 46     |        |    |    |  |   |
| CONNECT | 12 | 4  | 13 | 47     | 48     |        |    |    |  |   |
| CONNECT | 13 | 12 | 33 | 49     | 50     |        |    |    |  |   |
| CONNECT | 14 | 6  | 7  | 15     | 16     | 17     | 18 | 19 |  |   |
| CONNECT | 15 | 14 | 21 |        |        |        |    |    |  |   |
| CONNECT | 16 | 14 | 20 |        |        |        |    |    |  |   |
| CONNECT | 17 | 14 |    |        |        |        |    |    |  |   |
| CONNECT | 18 | 14 |    |        |        |        |    |    |  |   |
| CONNECT | 19 | 14 |    |        |        |        |    |    |  |   |
| CONNECT | 20 | 16 | 22 | 24     |        |        |    |    |  |   |
| CONNECT | 21 | 15 | 22 | 23     |        |        |    |    |  |   |

CONNECT 22 20 21 51 52  
CONNECT 23 21 27 28  
CONNECT 24 20 25 26  
CONNECT 25 24 53 54 55  
CONNECT 26 24 29 56 57  
CONNECT 27 23 30 58 59  
CONNECT 28 23 60 61 62  
CONNECT 29 26 31 63 64  
CONNECT 30 27 32 65 66  
CONNECT 31 29 67 68 69  
CONNECT 32 30 70 71 72  
CONNECT 33 13 73 74 75  
CONNECT 34 11 76 77 78  
CONNECT 35 1  
CONNECT 36 1  
CONNECT 37 5  
CONNECT 38 5  
CONNECT 39 5  
CONNECT 40 9  
CONNECT 41 9  
CONNECT 42 9  
CONNECT 43 10  
CONNECT 44 10  
CONNECT 45 11  
CONNECT 46 11  
CONNECT 47 12  
CONNECT 48 12  
CONNECT 49 13  
CONNECT 50 13  
CONNECT 51 22  
CONNECT 52 22  
CONNECT 53 25  
CONNECT 54 25  
CONNECT 55 25  
CONNECT 56 26  
CONNECT 57 26  
CONNECT 58 27  
CONNECT 59 27  
CONNECT 60 28  
CONNECT 61 28  
CONNECT 62 28  
CONNECT 63 29  
CONNECT 64 29  
CONNECT 65 30  
CONNECT 66 30  
CONNECT 67 31  
CONNECT 68 31  
CONNECT 69 31  
CONNECT 70 32  
CONNECT 71 32  
CONNECT 72 32



CONECT 73 33  
CONECT 74 33  
CONECT 75 33  
CONECT 76 34  
CONECT 77 34  
CONECT 78 34  
END

REMARK This PDB file was created by CS Chem3D.

|        |    |    |   |        |        |        |    |
|--------|----|----|---|--------|--------|--------|----|
| HETATM | 1  | N  | 1 | 0.640  | -2.346 | -0.548 | N  |
| HETATM | 2  | O  | 1 | -0.561 | -0.480 | 0.012  | O  |
| HETATM | 3  | O  | 1 | -1.180 | 0.000  | 2.319  | O  |
| HETATM | 4  | C  | 1 | -1.397 | -0.613 | 5.045  | C  |
| HETATM | 5  | N  | 1 | -0.577 | -1.333 | 4.067  | N  |
| HETATM | 6  | C  | 1 | -0.521 | -0.947 | 2.739  | C  |
| HETATM | 7  | C  | 1 | 0.109  | -1.451 | 0.365  | C  |
| HETATM | 8  | C  | 1 | 0.292  | -1.850 | 1.823  | C  |
| HETATM | 9  | C  | 1 | 1.602  | -3.398 | -0.204 | C  |
| HETATM | 10 | C  | 1 | 0.324  | -2.276 | -1.973 | C  |
| HETATM | 11 | C  | 1 | 3.031  | -2.840 | -0.229 | C  |
| HETATM | 12 | C  | 1 | -1.047 | -2.910 | -2.236 | C  |
| HETATM | 13 | C  | 1 | 0.152  | -2.472 | 4.632  | C  |
| HETATM | 14 | C  | 1 | -0.697 | -3.751 | 4.629  | C  |
| HETATM | 15 | C  | 1 | -0.593 | 0.479  | 5.762  | C  |
| HETATM | 16 | O  | 1 | 1.482  | 0.730  | -0.119 | O  |
| HETATM | 17 | O  | 1 | -1.532 | 1.941  | 0.009  | O  |
| HETATM | 18 | Cl | 1 | 1.676  | 0.987  | 2.663  | Cl |
| HETATM | 19 | Cl | 1 | -1.100 | 2.581  | 2.635  | Cl |
| HETATM | 20 | Cl | 1 | 0.903  | 3.240  | 0.675  | Cl |
| HETATM | 21 | C  | 1 | -1.389 | 1.656  | -1.175 | C  |
| HETATM | 22 | C  | 1 | 1.277  | 1.190  | -1.246 | C  |
| HETATM | 23 | C  | 1 | -0.053 | 1.578  | -1.922 | C  |
| HETATM | 24 | N  | 1 | 2.386  | 1.326  | -2.075 | N  |
| HETATM | 25 | N  | 1 | -2.520 | 1.522  | -1.964 | N  |
| HETATM | 26 | C  | 1 | -3.858 | 1.506  | -1.367 | C  |
| HETATM | 27 | C  | 1 | -2.525 | 1.456  | -3.429 | C  |
| HETATM | 28 | C  | 1 | 2.350  | 1.873  | -3.438 | C  |
| HETATM | 29 | C  | 1 | 3.732  | 0.973  | -1.604 | C  |
| HETATM | 30 | C  | 1 | 4.316  | 2.001  | -0.623 | C  |
| HETATM | 31 | C  | 1 | -4.359 | 2.928  | -1.082 | C  |
| HETATM | 32 | C  | 1 | -2.542 | 0.012  | -3.945 | C  |
| HETATM | 33 | C  | 1 | 2.584  | 3.390  | -3.453 | C  |
| HETATM | 34 | H  | 1 | -0.136 | -2.872 | 1.932  | H  |
| HETATM | 35 | H  | 1 | 1.372  | -1.831 | 2.090  | H  |
| HETATM | 36 | H  | 1 | -2.300 | -0.171 | 4.565  | H  |
| HETATM | 37 | H  | 1 | -1.802 | -1.319 | 5.807  | H  |
| HETATM | 38 | H  | 1 | 1.389  | -3.869 | 0.779  | H  |
| HETATM | 39 | H  | 1 | 1.526  | -4.249 | -0.921 | H  |
| HETATM | 40 | H  | 1 | 0.353  | -1.227 | -2.333 | H  |
| HETATM | 41 | H  | 1 | 1.093  | -2.798 | -2.588 | H  |
| HETATM | 42 | H  | 1 | 3.772  | -3.626 | 0.043  | H  |
| HETATM | 43 | H  | 1 | 3.296  | -2.464 | -1.243 | H  |
| HETATM | 44 | H  | 1 | 3.152  | -1.998 | 0.489  | H  |
| HETATM | 45 | H  | 1 | -1.282 | -2.925 | -3.325 | H  |
| HETATM | 46 | H  | 1 | -1.075 | -3.963 | -1.873 | H  |
| HETATM | 47 | H  | 1 | -1.859 | -2.349 | -1.719 | H  |
| HETATM | 48 | H  | 1 | 1.119  | -2.645 | 4.111  | H  |
| HETATM | 49 | H  | 1 | 0.452  | -2.250 | 5.683  | H  |
| HETATM | 50 | H  | 1 | -0.122 | -4.609 | 5.049  | H  |

AuCl3 bis tetraethyl malonamide

|         |    |    |    |        |        |        |    |
|---------|----|----|----|--------|--------|--------|----|
| HETATM  | 51 | H  | 1  | -1.617 | -3.634 | 5.245  | H  |
| HETATM  | 52 | H  | 1  | -1.020 | -4.038 | 3.604  | H  |
| HETATM  | 53 | H  | 1  | -1.230 | 1.027  | 6.494  | H  |
| HETATM  | 54 | H  | 1  | 0.271  | 0.054  | 6.322  | H  |
| HETATM  | 55 | H  | 1  | -0.189 | 1.228  | 5.046  | H  |
| HETATM  | 56 | H  | 1  | 0.059  | 2.597  | -2.361 | H  |
| HETATM  | 57 | H  | 1  | -0.167 | 0.822  | -2.728 | H  |
| HETATM  | 58 | H  | 1  | -4.585 | 0.992  | -2.037 | H  |
| HETATM  | 59 | H  | 1  | -3.859 | 0.896  | -0.433 | H  |
| HETATM  | 60 | H  | 1  | -3.429 | 1.980  | -3.822 | H  |
| HETATM  | 61 | H  | 1  | -1.684 | 2.032  | -3.874 | H  |
| HETATM  | 62 | H  | 1  | 3.121  | 1.386  | -4.079 | H  |
| HETATM  | 63 | H  | 1  | 1.407  | 1.622  | -3.969 | H  |
| HETATM  | 64 | H  | 1  | 3.713  | -0.034 | -1.129 | H  |
| HETATM  | 65 | H  | 1  | 4.445  | 0.868  | -2.454 | H  |
| HETATM  | 66 | H  | 1  | 5.359  | 1.727  | -0.343 | H  |
| HETATM  | 67 | H  | 1  | 4.346  | 3.021  | -1.065 | H  |
| HETATM  | 68 | H  | 1  | 3.738  | 2.064  | 0.324  | H  |
| HETATM  | 69 | H  | 1  | -5.385 | 2.907  | -0.647 | H  |
| HETATM  | 70 | H  | 1  | -3.702 | 3.462  | -0.359 | H  |
| HETATM  | 71 | H  | 1  | -4.400 | 3.535  | -2.015 | H  |
| HETATM  | 72 | H  | 1  | -2.618 | -0.012 | -5.057 | H  |
| HETATM  | 73 | H  | 1  | -1.614 | -0.532 | -3.671 | H  |
| HETATM  | 74 | H  | 1  | -3.403 | -0.561 | -3.535 | H  |
| HETATM  | 75 | H  | 1  | 2.436  | 3.804  | -4.477 | H  |
| HETATM  | 76 | H  | 1  | 1.888  | 3.924  | -2.769 | H  |
| HETATM  | 77 | H  | 1  | 3.623  | 3.643  | -3.145 | H  |
| HETATM  | 78 | Au | 1  | -0.060 | 1.139  | 1.099  | AU |
| CONNECT | 1  | 7  | 9  | 10     |        |        |    |
| CONNECT | 2  | 7  | 78 |        |        |        |    |
| CONNECT | 3  | 6  | 78 |        |        |        |    |
| CONNECT | 4  | 5  | 15 | 36     | 37     |        |    |
| CONNECT | 5  | 4  | 6  | 13     |        |        |    |
| CONNECT | 6  | 3  | 5  | 8      |        |        |    |
| CONNECT | 7  | 1  | 2  | 8      |        |        |    |
| CONNECT | 8  | 6  | 7  | 34     | 35     |        |    |
| CONNECT | 9  | 1  | 11 | 38     | 39     |        |    |
| CONNECT | 10 | 1  | 12 | 40     | 41     |        |    |
| CONNECT | 11 | 9  | 42 | 43     | 44     |        |    |
| CONNECT | 12 | 10 | 45 | 46     | 47     |        |    |
| CONNECT | 13 | 5  | 14 | 48     | 49     |        |    |
| CONNECT | 14 | 13 | 50 | 51     | 52     |        |    |
| CONNECT | 15 | 4  | 53 | 54     | 55     |        |    |
| CONNECT | 16 | 22 | 78 |        |        |        |    |
| CONNECT | 17 | 21 | 78 |        |        |        |    |
| CONNECT | 18 | 78 |    |        |        |        |    |
| CONNECT | 19 | 78 |    |        |        |        |    |
| CONNECT | 20 | 78 |    |        |        |        |    |
| CONNECT | 21 | 17 | 23 | 25     |        |        |    |

CONNECT 22 16 23 24  
CONNECT 23 21 22 56 57  
CONNECT 24 22 28 29  
CONNECT 25 21 26 27  
CONNECT 26 25 31 58 59  
CONNECT 27 25 32 60 61  
CONNECT 28 24 33 62 63  
CONNECT 29 24 30 64 65  
CONNECT 30 29 66 67 68  
CONNECT 31 26 69 70 71  
CONNECT 32 27 72 73 74  
CONNECT 33 28 75 76 77  
CONNECT 34 8  
CONNECT 35 8  
CONNECT 36 4  
CONNECT 37 4  
CONNECT 38 9  
CONNECT 39 9  
CONNECT 40 10  
CONNECT 41 10  
CONNECT 42 11  
CONNECT 43 11  
CONNECT 44 11  
CONNECT 45 12  
CONNECT 46 12  
CONNECT 47 12  
CONNECT 48 13  
CONNECT 49 13  
CONNECT 50 14  
CONNECT 51 14  
CONNECT 52 14  
CONNECT 53 15  
CONNECT 54 15  
CONNECT 55 15  
CONNECT 56 23  
CONNECT 57 23  
CONNECT 58 26  
CONNECT 59 26  
CONNECT 60 27  
CONNECT 61 27  
CONNECT 62 28  
CONNECT 63 28  
CONNECT 64 29  
CONNECT 65 29  
CONNECT 66 30  
CONNECT 67 30  
CONNECT 68 30  
CONNECT 69 31  
CONNECT 70 31  
CONNECT 71 31  
CONNECT 72 32

```
CONECT 73 32
CONECT 74 32
CONECT 75 33
CONECT 76 33
CONECT 77 33
CONECT 78 3 2 16 17 18 19 20
END
```

REMARK This PDB file was created by CS Chem3D.

|        |    |    |   |        |        |        |    |
|--------|----|----|---|--------|--------|--------|----|
| HETATM | 1  | C  | 1 | -1.575 | -2.576 | -0.470 | C  |
| HETATM | 2  | C  | 1 | -0.044 | -2.648 | -0.398 | C  |
| HETATM | 3  | C  | 1 | -2.412 | -1.295 | -0.428 | C  |
| HETATM | 4  | N  | 1 | -3.774 | -1.502 | -0.606 | N  |
| HETATM | 5  | C  | 1 | -4.688 | -0.363 | -0.707 | C  |
| HETATM | 6  | O  | 1 | -2.073 | -0.129 | -0.239 | O  |
| HETATM | 7  | O  | 1 | 0.799  | -1.748 | -0.412 | O  |
| HETATM | 8  | N  | 1 | 0.437  | -3.951 | -0.331 | N  |
| HETATM | 9  | C  | 1 | -0.413 | -5.143 | -0.339 | C  |
| HETATM | 10 | C  | 1 | 1.872  | -4.249 | -0.272 | C  |
| HETATM | 11 | C  | 1 | 2.437  | -4.651 | -1.645 | C  |
| HETATM | 12 | C  | 1 | -4.454 | -2.802 | -0.595 | C  |
| HETATM | 13 | C  | 1 | -5.217 | -3.032 | 0.723  | C  |
| HETATM | 14 | Au | 1 | -0.086 | 0.053  | -0.365 | AU |
| HETATM | 15 | O  | 1 | 0.386  | 1.551  | 0.892  | O  |
| HETATM | 16 | O  | 1 | -0.433 | 1.720  | -1.436 | O  |
| HETATM | 17 | Cl | 1 | -0.283 | -0.817 | 1.807  | CL |
| HETATM | 18 | Cl | 1 | 2.134  | 0.544  | -0.931 | CL |
| HETATM | 19 | Cl | 1 | -0.336 | -0.650 | -2.590 | CL |
| HETATM | 20 | C  | 1 | -1.477 | 2.250  | -1.068 | C  |
| HETATM | 21 | C  | 1 | -0.637 | 2.102  | 1.300  | C  |
| HETATM | 22 | C  | 1 | -1.757 | 2.588  | 0.390  | C  |
| HETATM | 23 | N  | 1 | -0.754 | 2.469  | 2.630  | N  |
| HETATM | 24 | N  | 1 | -2.428 | 2.667  | -1.982 | N  |
| HETATM | 25 | C  | 1 | -2.251 | 2.407  | -3.409 | C  |
| HETATM | 26 | C  | 1 | -3.663 | 3.384  | -1.652 | C  |
| HETATM | 27 | C  | 1 | -1.956 | 3.047  | 3.242  | C  |
| HETATM | 28 | C  | 1 | 0.343  | 2.238  | 3.569  | C  |
| HETATM | 29 | C  | 1 | -3.625 | 4.861  | -2.087 | C  |
| HETATM | 30 | C  | 1 | -2.761 | 2.011  | 4.047  | C  |
| HETATM | 31 | C  | 1 | -2.534 | 5.676  | -1.382 | C  |
| HETATM | 32 | C  | 1 | -3.490 | 0.984  | 3.171  | C  |
| HETATM | 33 | C  | 1 | -4.308 | -3.034 | 1.960  | C  |
| HETATM | 34 | C  | 1 | 2.307  | -3.547 | -2.701 | C  |
| HETATM | 35 | H  | 1 | -1.938 | -3.169 | 0.401  | H  |
| HETATM | 36 | H  | 1 | -1.828 | -3.067 | -1.441 | H  |
| HETATM | 37 | H  | 1 | -4.361 | 0.324  | -1.521 | H  |
| HETATM | 38 | H  | 1 | -5.730 | -0.662 | -0.952 | H  |
| HETATM | 39 | H  | 1 | -4.715 | 0.198  | 0.255  | H  |
| HETATM | 40 | H  | 1 | -1.061 | -5.169 | -1.243 | H  |
| HETATM | 41 | H  | 1 | 0.177  | -6.085 | -0.365 | H  |
| HETATM | 42 | H  | 1 | -1.035 | -5.192 | 0.582  | H  |
| HETATM | 43 | H  | 1 | 2.462  | -3.399 | 0.139  | H  |
| HETATM | 44 | H  | 1 | 2.052  | -5.071 | 0.460  | H  |
| HETATM | 45 | H  | 1 | 3.518  | -4.909 | -1.528 | H  |
| HETATM | 46 | H  | 1 | 1.927  | -5.572 | -2.014 | H  |
| HETATM | 47 | H  | 1 | -5.170 | -2.846 | -1.450 | H  |
| HETATM | 48 | H  | 1 | -3.781 | -3.666 | -0.774 | H  |
| HETATM | 49 | H  | 1 | -5.753 | -4.010 | 0.670  | H  |
| HETATM | 50 | H  | 1 | -6.001 | -2.250 | 0.854  | H  |

|         |    |    |    |        |        |        |    |    |  |   |
|---------|----|----|----|--------|--------|--------|----|----|--|---|
| HETATM  | 51 | H  | 1  | -1.778 | 3.699  | 0.465  |    |    |  | H |
| HETATM  | 52 | H  | 1  | -2.721 | 2.142  | 0.717  |    |    |  | H |
| HETATM  | 53 | H  | 1  | -1.299 | 2.857  | -3.772 |    |    |  | H |
| HETATM  | 54 | H  | 1  | -2.238 | 1.311  | -3.598 |    |    |  | H |
| HETATM  | 55 | H  | 1  | -3.073 | 2.821  | -4.032 |    |    |  | H |
| HETATM  | 56 | H  | 1  | -4.518 | 2.874  | -2.158 |    |    |  | H |
| HETATM  | 57 | H  | 1  | -3.925 | 3.334  | -0.575 |    |    |  | H |
| HETATM  | 58 | H  | 1  | -1.650 | 3.878  | 3.922  |    |    |  | H |
| HETATM  | 59 | H  | 1  | -2.626 | 3.550  | 2.513  |    |    |  | H |
| HETATM  | 60 | H  | 1  | 1.293  | 2.656  | 3.166  |    |    |  | H |
| HETATM  | 61 | H  | 1  | 0.175  | 2.722  | 4.556  |    |    |  | H |
| HETATM  | 62 | H  | 1  | 0.476  | 1.150  | 3.758  |    |    |  | H |
| HETATM  | 63 | H  | 1  | -4.617 | 5.329  | -1.870 |    |    |  | H |
| HETATM  | 64 | H  | 1  | -3.478 | 4.938  | -3.190 |    |    |  | H |
| HETATM  | 65 | H  | 1  | -3.526 | 2.546  | 4.661  |    |    |  | H |
| HETATM  | 66 | H  | 1  | -2.092 | 1.480  | 4.763  |    |    |  | H |
| HETATM  | 67 | H  | 1  | -2.533 | 6.732  | -1.740 |    |    |  | H |
| HETATM  | 68 | H  | 1  | -1.522 | 5.256  | -1.580 |    |    |  | H |
| HETATM  | 69 | H  | 1  | -2.699 | 5.701  | -0.281 |    |    |  | H |
| HETATM  | 70 | H  | 1  | -4.058 | 0.256  | 3.794  |    |    |  | H |
| HETATM  | 71 | H  | 1  | -2.777 | 0.399  | 2.551  |    |    |  | H |
| HETATM  | 72 | H  | 1  | -4.217 | 1.479  | 2.488  |    |    |  | H |
| HETATM  | 73 | H  | 1  | -4.903 | -3.181 | 2.890  |    |    |  | H |
| HETATM  | 74 | H  | 1  | -3.759 | -2.071 | 2.066  |    |    |  | H |
| HETATM  | 75 | H  | 1  | -3.561 | -3.859 | 1.909  |    |    |  | H |
| HETATM  | 76 | H  | 1  | 2.781  | -3.855 | -3.661 |    |    |  | H |
| HETATM  | 77 | H  | 1  | 1.238  | -3.322 | -2.919 |    |    |  | H |
| HETATM  | 78 | H  | 1  | 2.802  | -2.607 | -2.367 |    |    |  | H |
| CONNECT | 1  | 2  | 3  | 35     | 36     |        |    |    |  |   |
| CONNECT | 2  | 1  | 7  | 8      |        |        |    |    |  |   |
| CONNECT | 3  | 1  | 4  | 6      |        |        |    |    |  |   |
| CONNECT | 4  | 3  | 5  | 12     |        |        |    |    |  |   |
| CONNECT | 5  | 4  | 37 | 38     | 39     |        |    |    |  |   |
| CONNECT | 6  | 3  | 14 |        |        |        |    |    |  |   |
| CONNECT | 7  | 2  | 14 |        |        |        |    |    |  |   |
| CONNECT | 8  | 2  | 9  | 10     |        |        |    |    |  |   |
| CONNECT | 9  | 8  | 40 | 41     | 42     |        |    |    |  |   |
| CONNECT | 10 | 8  | 11 | 43     | 44     |        |    |    |  |   |
| CONNECT | 11 | 10 | 34 | 45     | 46     |        |    |    |  |   |
| CONNECT | 12 | 4  | 13 | 47     | 48     |        |    |    |  |   |
| CONNECT | 13 | 12 | 33 | 49     | 50     |        |    |    |  |   |
| CONNECT | 14 | 6  | 7  | 15     | 16     | 17     | 18 | 19 |  |   |
| CONNECT | 15 | 14 | 21 |        |        |        |    |    |  |   |
| CONNECT | 16 | 14 | 20 |        |        |        |    |    |  |   |
| CONNECT | 17 | 14 |    |        |        |        |    |    |  |   |
| CONNECT | 18 | 14 |    |        |        |        |    |    |  |   |
| CONNECT | 19 | 14 |    |        |        |        |    |    |  |   |
| CONNECT | 20 | 16 | 22 | 24     |        |        |    |    |  |   |
| CONNECT | 21 | 15 | 22 | 23     |        |        |    |    |  |   |
| CONNECT | 22 | 20 | 21 | 51     | 52     |        |    |    |  |   |
| CONNECT | 23 | 21 | 27 | 28     |        |        |    |    |  |   |

CONNECT 24 20 25 26  
CONNECT 25 24 53 54 55  
CONNECT 26 24 29 56 57  
CONNECT 27 23 30 58 59  
CONNECT 28 23 60 61 62  
CONNECT 29 26 31 63 64  
CONNECT 30 27 32 65 66  
CONNECT 31 29 67 68 69  
CONNECT 32 30 70 71 72  
CONNECT 33 13 73 74 75  
CONNECT 34 11 76 77 78  
CONNECT 35 1  
CONNECT 36 1  
CONNECT 37 5  
CONNECT 38 5  
CONNECT 39 5  
CONNECT 40 9  
CONNECT 41 9  
CONNECT 42 9  
CONNECT 43 10  
CONNECT 44 10  
CONNECT 45 11  
CONNECT 46 11  
CONNECT 47 12  
CONNECT 48 12  
CONNECT 49 13  
CONNECT 50 13  
CONNECT 51 22  
CONNECT 52 22  
CONNECT 53 25  
CONNECT 54 25  
CONNECT 55 25  
CONNECT 56 26  
CONNECT 57 26  
CONNECT 58 27  
CONNECT 59 27  
CONNECT 60 28  
CONNECT 61 28  
CONNECT 62 28  
CONNECT 63 29  
CONNECT 64 29  
CONNECT 65 30  
CONNECT 66 30  
CONNECT 67 31  
CONNECT 68 31  
CONNECT 69 31  
CONNECT 70 32  
CONNECT 71 32  
CONNECT 72 32  
CONNECT 73 33  
CONNECT 74 33



CONECT 75 33  
CONECT 76 34  
CONECT 77 34  
CONECT 78 34  
END

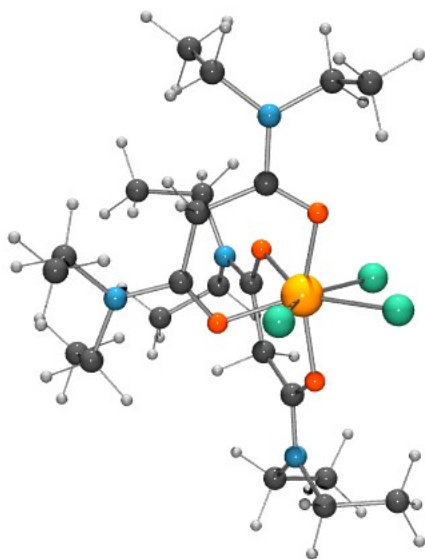

Iron trichloride *bis* tetraethyl malonamide

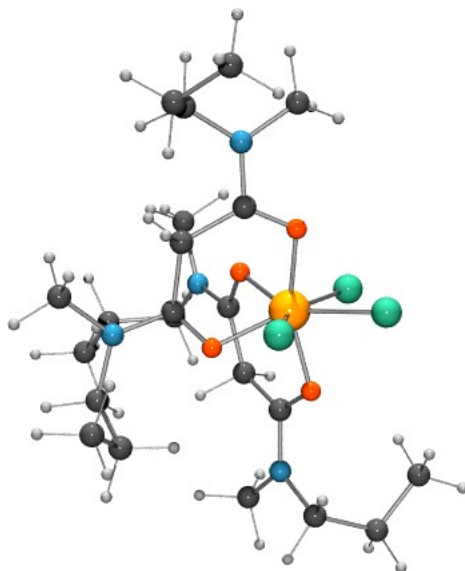

Iron trichloride *bis* dimethyldipropyl malonamide

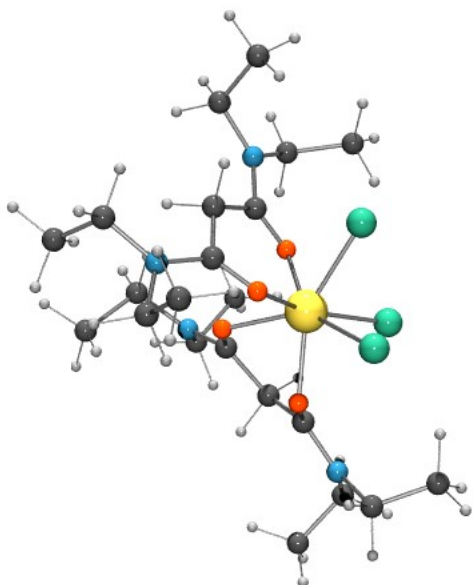

Gold trichloride *bis* tetraethyl malonamide

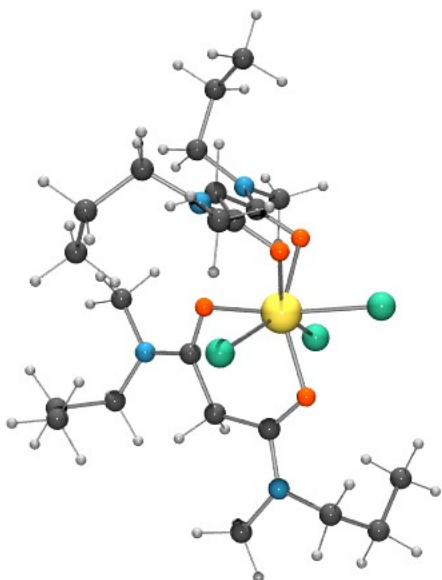

Gold trichloride *bis* dimethyl dipropyl malonamide
