# Supplementary material for: Sustainable solvent extraction of gold and other metals with biomass chemicals
Source: Royal Society of Chemistry journal article supplement (doi:10.1039/d3su00078h), 2024-01-01
Supplement: d3su00078h3.zip [file d3su00078h3.zip]

## Sheet: Sheet1
RT(milliseconds)	RT(minutes)	RI	30	31	32	33	34	35	36	37	38	39	40	41	42	43	44	45	46	47	48	49	50	51	52	53	54	55	56	57	58	59	60	61	62	63	64	65	66	67	68	69	70	71	72	73	74	75	76
186217	3.10362	0	4	2	320	0	0	17	14	18	3	19	113	33	16	6	44	8	0	25	19	211	11	60	4	9	0	11	1	3	0	3	2	0	1	2	2	0	2	3	5	9	5	5	1	2	2	1	1
187230	3.1205	0	1	0	260	0	0	23	9	8	5	13	110	25	4	6	29	3	0	27	19	212	19	89	6	5	5	4	10	5	1	2	0	2	0	0	0	1	1	11	0	10	6	2	0	11	4	1	0
188242	3.13737	0	1	0	295	1	2	24	23	13	6	13	114	17	5	12	48	3	0	33	20	199	20	72	1	2	7	15	6	8	2	6	0	1	0	7	1	3	10	6	4	4	11	0	1	3	2	2	9
189254	3.15423	0	0	0	287	0	6	17	16	10	9	16	97	21	7	13	40	0	0	26	20	193	24	65	4	6	3	16	9	6	2	0	0	0	0	1	4	1	0	13	3	5	7	2	0	8	5	1	2
190266	3.1711	0	0	2	305	0	2	23	20	10	9	12	117	30	8	6	46	2	3	25	27	231	6	61	2	6	4	17	7	0	1	3	0	0	5	4	1	6	1	4	3	14	5	1	0	12	3	1	2
191278	3.18797	0	0	0	337	1	2	24	15	3	14	18	116	17	3	17	39	4	0	29	12	216	15	56	0	3	3	10	10	2	0	3	0	0	0	0	1	0	7	10	0	12	3	1	0	6	4	3	0
192290	3.20483	0	0	0	285	0	4	13	15	10	14	6	119	24	1	8	48	5	0	31	13	192	12	60	2	6	1	11	10	6	0	0	0	3	4	4	0	2	1	9	5	7	3	2	1	9	4	0	0
193303	3.22172	0	0	1	312	0	0	17	6	14	6	20	100	12	7	7	27	0	0	23	20	171	13	70	4	1	6	12	10	3	1	3	1	1	0	2	0	2	3	4	2	2	4	0	0	4	0	1	3
194315	3.23858	0	0	0	297	1	0	23	11	5	14	15	85	18	8	10	21	5	0	13	14	184	9	68	2	3	3	8	8	0	1	0	0	2	1	1	3	2	11	9	6	2	1	6	0	6	2	1	1
195327	3.25545	0	0	1	312	0	3	17	16	9	7	12	135	22	13	11	31	7	1	27	25	192	6	61	0	2	5	18	8	3	1	3	1	0	0	5	1	1	3	12	1	9	6	5	2	1	5	0	0
196339	3.27232	0	0	0	330	0	3	15	14	11	5	15	120	16	7	8	30	1	0	31	23	155	12	56	6	4	1	11	3	10	1	9	2	0	0	2	0	1	2	7	0	1	8	3	0	10	2	4	0
197351	3.28918	0	2	1	304	1	0	15	19	6	3	12	115	26	12	13	33	4	0	28	14	183	12	56	6	3	4	15	6	4	0	0	2	2	1	1	0	2	3	8	0	5	2	1	0	11	3	1	1
198364	3.30607	0	0	0	340	0	0	11	11	7	5	15	147	18	15	13	45	4	0	28	9	162	17	55	2	3	3	14	8	1	0	2	0	0	0	0	0	1	3	3	2	5	2	4	1	3	0	0	1
199376	3.32293	0	1	1	352	0	0	12	8	6	7	19	130	25	7	5	46	2	1	23	13	174	10	80	5	3	3	9	5	8	0	0	0	2	4	5	1	0	4	4	0	10	5	2	0	5	5	1	0
200388	3.3398	0	0	0	343	0	1	17	11	5	1	10	124	25	10	6	42	1	0	22	17	195	9	63	4	11	2	12	2	8	0	9	0	0	0	0	0	0	0	11	0	13	5	4	1	10	5	2	0
201400	3.35667	0	0	2	326	0	0	18	4	6	8	6	107	21	11	13	24	2	4	19	15	186	10	62	3	10	4	5	3	4	2	1	0	0	0	2	0	2	2	2	2	3	8	2	0	3	2	0	0
202412	3.37353	0	2	0	294	0	4	24	15	8	1	18	113	17	2	12	26	1	0	29	17	171	11	49	5	8	2	8	2	3	5	1	0	0	1	4	2	0	0	10	1	8	4	0	0	2	1	2	0
203424	3.3904	0	0	0	311	0	1	11	9	1	7	8	115	25	7	9	25	0	2	20	0	179	5	71	5	4	6	10	5	2	0	2	0	1	0	2	1	1	1	4	1	0	0	1	0	5	1	0	0
204437	3.40728	0	0	0	300	0	1	17	6	4	2	12	123	28	4	8	44	1	1	16	11	171	6	64	1	3	4	8	2	3	3	1	1	2	0	0	0	5	3	6	1	5	4	3	1	2	2	0	0
205449	3.42415	0	0	0	292	0	0	19	3	6	9	22	130	33	9	8	46	0	0	23	12	130	9	64	1	1	0	15	2	6	0	1	0	3	1	3	4	3	0	4	1	5	1	2	0	2	0	3	0
206461	3.44102	0	0	4	301	0	2	18	16	4	6	17	121	16	8	10	50	3	1	29	20	177	8	48	4	1	2	16	3	2	3	11	2	1	0	3	2	1	0	7	1	5	3	4	0	14	1	5	0
207473	3.45788	0	0	0	274	1	0	11	4	9	8	15	123	22	10	9	60	0	0	26	8	176	8	46	2	2	0	18	4	1	0	3	0	0	3	3	0	2	0	9	0	6	3	0	1	8	3	0	0
208485	3.47475	0	2	0	312	0	2	9	1	9	7	15	132	25	1	10	22	5	0	31	27	143	9	20	0	0	0	12	1	1	0	1	0	0	2	2	5	3	3	6	7	0	1	1	0	8	0	0	0
209498	3.49163	0	0	0	287	0	1	16	3	4	5	14	116	17	5	5	43	5	0	27	11	158	8	44	4	8	2	12	2	5	1	0	0	3	0	0	6	2	5	12	2	5	1	8	1	9	0	0	0
210510	3.5085	0	0	1	336	0	0	15	6	8	0	20	119	29	10	4	48	3	0	24	13	135	8	50	2	3	0	16	4	0	0	1	0	2	0	2	2	6	0	9	5	8	6	0	0	9	4	1	2
211522	3.52537	0	0	0	269	0	1	18	7	5	2	18	124	25	0	16	45	1	0	34	17	174	10	58	7	1	2	9	4	5	1	0	1	0	2	0	0	0	5	9	9	0	3	0	0	4	3	0	0
212534	3.54223	0	4	0	333	1	0	10	8	12	4	6	99	23	8	10	39	1	0	17	15	131	9	50	3	1	5	7	3	6	0	5	0	0	0	0	3	0	1	9	0	8	1	0	0	12	0	0	2
213546	3.5591	0	0	1	276	0	2	11	3	3	9	11	128	21	13	14	47	3	0	18	11	162	9	45	8	3	6	14	12	6	0	1	1	0	0	1	1	1	0	14	0	2	3	7	0	2	3	2	2
214558	3.57597	0	1	1	267	0	2	15	2	9	2	20	105	15	7	8	31	0	0	22	6	142	5	41	2	6	8	9	5	4	1	0	0	0	1	3	2	3	1	5	4	0	9	0	0	5	3	1	1
215571	3.59285	0	0	1	337	0	0	23	6	2	2	13	103	37	5	9	25	1	0	31	7	201	11	36	2	0	2	13	6	4	0	5	0	2	0	3	0	2	0	10	1	3	5	0	1	6	0	0	4
216583	3.60972	0	1	0	329	0	1	16	7	1	3	6	147	25	2	6	25	4	0	22	21	142	10	38	2	5	2	11	7	3	0	2	0	0	0	0	0	2	5	7	1	2	8	0	0	8	5	0	0
217595	3.62658	0	0	0	286	0	1	10	1	3	3	9	108	17	6	7	41	3	0	33	11	157	10	46	1	8	0	11	4	2	2	0	0	0	0	1	0	8	0	12	0	3	2	1	2	3	1	1	2
218607	3.64345	0	1	0	296	0	1	23	3	5	9	15	119	29	11	8	57	2	1	23	16	144	2	48	2	4	1	8	0	6	3	2	0	0	1	1	1	0	3	4	1	12	3	2	1	10	7	2	3
219619	3.66032	0	0	2	305	1	1	17	3	4	3	6	126	17	1	11	57	0	0	25	17	146	5	47	0	4	1	18	5	1	1	1	1	0	4	2	0	2	0	16	5	5	2	1	1	8	0	5	2
220632	3.6772	0	0	1	314	0	2	20	1	8	3	18	135	22	17	5	54	1	0	18	13	165	3	57	2	5	0	7	3	2	2	4	0	3	5	0	0	2	0	8	4	1	9	1	3	5	0	1	1
221644	3.69407	0	0	1	323	0	0	18	5	17	2	7	118	20	3	16	51	0	0	18	9	143	4	56	3	0	0	18	1	3	2	4	0	0	0	1	0	4	0	5	4	4	8	3	0	14	1	0	0
222656	3.71093	0	0	0	320	1	0	18	1	4	1	13	128	23	14	10	47	0	0	17	15	140	13	60	3	3	3	7	4	4	1	2	0	2	0	0	2	7	0	4	1	5	5	4	1	8	0	6	1
223668	3.7278	0	1	0	286	0	0	8	6	9	5	0	93	19	1	6	58	2	0	26	11	116	6	53	2	4	4	7	2	5	0	1	0	0	3	1	1	1	3	9	0	2	10	0	0	3	2	0	1
224680	3.74467	0	2	1	281	2	1	11	6	6	3	10	97	19	4	12	46	2	0	20	12	135	8	15	6	1	3	8	0	3	2	3	0	1	0	1	2	2	0	12	0	15	4	0	3	6	0	0	0
225692	3.76153	0	0	2	298	1	2	10	5	7	11	13	114	24	15	9	45	3	0	15	14	133	5	47	0	3	1	5	3	2	1	4	0	1	0	0	4	1	4	12	1	2	3	4	2	10	0	1	0
226705	3.77842	0	0	2	308	1	1	13	4	5	3	13	118	20	9	12	46	3	0	41	7	113	5	38	4	2	7	21	3	9	0	2	0	1	2	2	0	4	3	7	1	4	8	0	1	5	0	0	2
227717	3.79528	0	0	2	291	0	2	9	4	9	10	11	119	12	9	8	40	1	0	17	15	128	10	22	2	5	2	8	0	3	4	0	0	0	3	2	1	8	2	11	1	1	4	4	0	1	1	1	3
228729	3.81215	0	0	0	280	0	5	18	2	2	6	5	129	21	7	11	63	2	0	25	16	129	11	15	2	3	0	3	3	1	3	0	0	0	0	4	0	3	1	7	0	3	2	1	0	9	3	1	1
229741	3.82902	0	1	0	360	0	2	9	10	4	3	9	123	19	8	4	42	1	0	19	11	132	6	18	2	2	0	15	6	4	1	0	0	4	3	4	3	6	0	4	6	5	2	1	0	9	2	0	1
230753	3.84588	0	1	0	330	0	0	18	6	4	9	8	93	31	4	5	50	2	0	19	14	122	4	33	3	3	1	11	7	2	0	0	2	0	0	2	1	3	0	8	0	3	3	2	0	14	2	1	0
231766	3.86277	0	0	0	319	1	1	8	9	7	8	11	100	35	5	12	49	1	0	25	15	118	7	36	1	4	1	8	4	1	0	6	0	0	1	1	0	2	1	11	3	4	9	0	1	6	5	2	0
232778	3.87963	0	2	0	294	1	1	13	5	9	0	8	108	17	3	1	36	3	0	22	13	139	8	29	6	5	6	9	5	4	0	5	0	2	1	3	3	0	0	6	5	6	2	6	0	4	1	0	0
233790	3.8965	0	1	0	286	0	1	10	3	5	11	9	106	15	6	6	52	3	0	25	17	101	5	30	1	1	4	8	3	3	0	3	0	1	0	0	0	1	2	11	1	8	4	1	0	1	6	3	0
234802	3.91337	0	0	0	330	0	0	8	5	5	3	10	112	19	4	5	66	0	0	21	9	107	0	46	6	3	1	9	0	2	0	2	0	0	0	2	3	1	0	2	1	6	10	3	1	9	1	2	0
235814	3.93023	0	0	1	275	0	0	20	3	6	7	13	113	23	9	7	58	3	0	21	9	129	4	22	5	4	2	16	6	3	0	0	1	1	0	1	1	0	4	6	6	2	4	1	0	5	5	4	0
236826	3.9471	0	1	0	349	0	1	16	6	1	4	17	144	18	4	7	40	0	0	19	12	127	5	17	1	2	0	5	6	5	1	1	2	1	1	1	1	5	1	4	0	4	5	7	0	4	0	2	0
237839	3.96398	0	0	0	291	0	3	10	2	4	2	14	117	24	10	17	55	0	2	12	11	119	5	24	4	4	1	12	0	6	1	2	1	2	0	4	0	8	4	11	3	6	9	2	0	12	1	1	0
238851	3.98085	0	0	0	300	0	0	9	6	2	2	17	99	23	1	17	47	0	0	18	19	146	3	33	4	4	4	12	2	2	1	2	0	0	0	1	0	6	2	12	5	0	5	0	0	4	0	0	1
239863	3.99772	0	0	0	332	0	0	11	4	5	2	16	106	28	9	8	51	1	0	29	13	112	8	24	3	7	2	11	8	2	3	0	1	2	1	3	1	2	2	2	2	9	3	3	0	9	0	0	0
240875	4.01458	0	0	0	293	0	3	5	4	6	3	12	108	14	8	9	59	2	0	17	10	94	12	22	10	7	0	20	3	3	1	0	0	2	4	1	0	3	0	8	4	7	4	3	0	3	7	0	0
241887	4.03145	0	2	1	302	0	0	6	1	4	2	11	112	29	7	13	48	1	0	26	8	89	4	30	3	3	1	4	0	5	0	0	0	1	1	0	3	4	1	10	3	1	4	2	0	2	0	0	1
242900	4.04833	0	0	2	348	0	2	10	2	2	3	16	130	30	10	13	49	5	0	18	23	126	7	28	0	0	3	11	3	7	0	2	0	1	0	4	0	0	2	10	6	1	4	3	1	4	0	0	0
243912	4.0652	0	0	1	274	0	0	7	1	6	4	14	113	15	5	8	56	1	0	22	6	130	3	24	1	4	4	7	4	3	0	3	0	1	0	2	5	4	2	6	1	7	3	1	0	6	0	0	1
244924	4.08207	0	0	0	320	0	8	8	11	4	6	19	113	24	7	14	54	0	0	24	10	116	4	23	5	0	3	11	10	5	0	0	0	2	2	2	1	2	1	2	3	7	6	0	0	2	0	3	0
245936	4.09893	0	1	0	356	0	0	13	4	4	3	5	135	26	6	10	57	2	0	17	11	122	7	30	3	2	1	5	4	3	0	0	1	1	4	2	0	6	0	4	4	4	3	1	0	6	0	4	0
246948	4.1158	0	0	7	304	0	1	9	7	5	3	12	132	17	14	8	26	2	0	21	6	101	7	23	3	0	3	8	3	2	0	1	0	2	1	3	1	3	0	4	3	8	3	8	0	4	0	1	3
247960	4.13267	0	0	0	344	0	3	10	2	5	6	22	101	19	6	4	54	5	0	23	12	128	6	18	3	1	2	12	0	2	0	1	0	0	1	3	10	6	2	12	2	4	1	1	0	3	1	0	0
248973	4.14955	0	0	1	352	0	2	8	2	2	5	14	126	8	8	7	50	0	0	34	14	131	12	28	2	5	0	7	4	0	0	2	1	0	0	4	2	3	0	8	0	9	8	1	0	1	1	1	1
249985	4.16642	0	1	0	355	0	2	8	2	5	3	12	109	15	7	3	68	2	0	17	7	106	6	37	2	5	1	12	7	7	2	1	0	0	1	5	1	7	2	6	3	2	5	4	0	3	2	1	0
250997	4.18328	0	1	2	350	0	2	8	6	7	6	11	107	18	5	5	47	0	0	24	10	105	8	49	1	9	2	13	8	3	3	5	0	0	0	2	3	3	4	4	0	1	1	2	2	6	1	0	0
252009	4.20015	0	0	1	343	0	0	14	2	4	3	9	121	17	8	4	29	0	0	18	11	93	8	20	4	5	2	14	6	1	0	0	0	3	0	5	0	0	5	13	2	0	3	0	3	3	0	1	1
253021	4.21702	0	0	1	304	0	0	6	2	3	2	1	111	15	4	5	37	0	0	24	9	123	15	31	2	6	2	10	2	2	0	2	0	0	0	2	2	2	3	3	4	8	4	2	0	2	0	3	1
254034	4.2339	0	0	2	330	1	0	6	2	12	0	20	143	12	8	9	24	2	1	13	13	98	1	28	4	6	0	4	3	4	0	0	0	0	2	0	3	1	0	8	2	6	2	3	3	4	1	1	3
255046	4.25077	0	0	0	326	0	2	13	6	11	6	15	127	26	6	5	43	0	4	17	7	99	7	19	0	0	0	16	3	3	0	2	0	0	0	1	1	6	0	9	0	0	2	2	0	10	5	0	0
256058	4.26763	0	2	3	318	0	1	5	3	12	6	9	110	13	5	17	23	7	1	16	11	114	8	11	4	9	1	7	8	2	0	1	0	1	0	4	1	8	1	5	3	4	7	0	1	6	1	4	0
257070	4.2845	0	0	2	311	0	0	6	4	6	2	13	121	26	1	19	23	3	0	19	9	94	3	25	0	2	1	5	3	1	0	0	0	0	0	2	2	0	0	5	4	4	2	3	0	4	2	1	0
258082	4.30137	0	0	4	288	0	3	18	6	3	1	11	114	11	4	5	41	1	0	18	8	99	4	41	2	3	1	7	6	5	0	1	0	2	3	2	3	1	1	12	1	3	1	1	2	5	0	2	0
259094	4.31823	0	0	0	333	0	1	7	6	16	7	16	127	19	0	10	48	0	0	16	8	91	4	35	0	5	3	7	0	3	1	0	0	0	3	2	1	2	1	2	3	3	4	1	2	6	0	0	1
260107	4.33512	0	0	0	340	0	2	5	4	4	10	10	103	11	5	11	53	0	0	20	10	86	5	17	4	8	0	4	0	3	0	1	0	1	0	1	0	3	0	14	2	10	5	0	1	5	5	0	3
261119	4.35198	0	0	0	316	0	2	13	4	1	2	16	108	17	11	10	50	0	0	11	8	105	6	37	2	6	0	12	0	4	0	0	1	0	0	0	0	3	1	11	1	2	3	0	0	7	2	0	0
262131	4.36885	0	0	0	377	0	3	13	2	2	1	6	109	19	8	5	33	0	0	17	14	113	4	21	1	6	1	14	9	4	0	0	0	0	1	1	3	0	0	4	0	0	11	0	0	4	4	3	0
263143	4.38572	0	3	1	309	1	4	12	5	5	1	7	123	20	4	7	41	0	1	26	7	117	6	22	1	4	3	13	5	4	0	3	0	5	1	3	2	4	0	10	1	4	0	0	1	10	0	6	0
264155	4.40258	0	0	2	331	0	3	10	2	2	7	7	104	10	10	9	41	1	0	24	6	122	8	34	1	2	4	3	5	4	0	0	1	0	4	2	1	2	1	3	3	9	6	4	0	7	2	0	1
265168	4.41947	0	1	0	321	0	2	6	3	5	2	5	134	15	9	11	54	2	0	16	5	94	5	25	7	7	7	9	0	3	2	3	0	0	0	4	0	0	0	4	5	11	7	3	0	8	0	2	0
266180	4.43633	0	0	4	321	1	2	1	6	0	4	12	126	12	2	5	56	3	1	9	9	89	7	26	3	2	0	11	5	3	0	3	1	0	0	1	1	3	2	11	5	9	2	0	0	18	6	0	1
267192	4.4532	0	0	0	361	0	3	12	3	4	8	11	121	16	10	13	60	1	1	15	11	78	10	32	2	1	2	7	4	1	2	0	0	3	6	0	1	2	4	8	4	2	9	1	1	5	1	0	4
268204	4.47007	0	0	1	295	1	1	13	3	0	0	17	115	8	9	3	67	2	0	15	3	98	9	30	1	0	0	5	4	4	0	0	0	1	3	3	1	0	0	9	4	5	5	0	0	7	0	3	0
269216	4.48693	0	0	1	356	1	0	5	1	1	2	17	111	21	8	10	83	1	0	24	7	85	5	29	5	0	6	9	4	0	2	0	0	2	0	2	0	0	1	8	4	2	3	0	1	8	3	1	2
270228	4.5038	0	0	0	324	0	0	7	4	7	11	19	128	10	6	5	54	0	0	26	12	75	7	21	9	4	5	16	4	11	1	8	0	1	1	2	0	2	6	16	2	4	1	3	0	5	0	0	2
271241	4.52068	0	0	0	363	0	0	10	1	1	1	10	87	27	2	10	51	0	0	12	5	75	7	22	4	3	2	4	4	4	2	3	2	0	0	2	0	0	4	6	2	7	8	2	7	6	0	3	0
272253	4.53755	0	0	2	308	4	0	5	1	8	3	13	122	11	14	4	57	0	0	15	9	85	9	27	3	5	0	12	2	3	1	1	0	1	3	3	0	6	0	7	4	10	2	1	0	13	1	4	0
273265	4.55442	0	0	1	329	0	0	4	2	4	1	13	136	14	4	2	50	7	0	19	15	90	9	25	4	3	0	11	13	1	1	0	0	1	1	0	0	1	0	8	1	5	0	0	0	6	3	3	0
274277	4.57128	0	0	0	307	0	0	3	3	7	1	16	121	21	12	5	60	0	1	22	5	74	7	20	0	4	0	8	1	6	0	2	0	2	1	3	3	4	3	3	3	8	1	9	2	11	0	0	0
275289	4.58815	0	2	0	320	0	0	16	2	9	1	14	94	10	6	4	61	2	0	19	8	80	3	20	3	1	0	7	8	0	0	0	0	0	1	6	2	0	2	6	0	8	0	0	0	5	2	2	0
276302	4.60503	0	0	6	363	0	2	7	2	2	2	13	123	9	6	5	75	2	0	21	7	78	6	28	4	2	0	5	5	0	0	0	0	2	3	2	0	1	0	6	1	2	5	2	0	3	1	2	0
277314	4.6219	0	0	1	356	0	1	4	3	7	0	8	114	17	7	6	73	1	0	26	9	93	5	22	0	1	0	8	1	0	0	0	0	2	0	5	0	1	1	11	0	5	3	0	0	4	2	1	1
278326	4.63877	0	0	1	352	0	0	8	5	9	4	7	130	15	1	3	46	2	1	25	14	88	5	23	1	2	0	3	4	2	0	2	0	0	0	5	0	1	1	9	5	7	2	1	1	8	1	2	1
279338	4.65563	0	0	1	330	0	1	7	3	4	2	10	124	16	7	3	52	0	1	22	10	76	0	21	0	2	3	4	3	1	0	0	1	0	0	2	2	0	1	6	0	2	3	1	0	21	2	0	0
280350	4.6725	0	0	1	359	0	1	9	4	7	3	11	118	20	3	4	72	1	0	24	6	86	5	26	1	3	1	6	1	6	0	1	0	0	0	0	0	4	1	7	0	0	7	2	0	7	3	1	0
281362	4.68937	0	0	1	309	0	1	9	2	2	3	20	123	10	12	7	60	2	0	9	12	82	9	24	1	1	3	13	7	8	0	0	1	0	1	4	0	2	5	16	8	9	5	0	0	8	2	0	0
282375	4.70625	0	0	0	336	0	1	8	8	1	1	16	98	12	6	8	47	4	0	18	7	79	6	24	1	7	2	4	1	5	0	2	0	0	0	0	1	2	1	8	3	4	9	4	2	14	1	1	2
283387	4.72312	0	0	0	334	0	1	14	1	3	4	18	114	20	3	8	71	1	0	14	8	72	1	19	0	6	0	12	4	4	2	1	0	0	0	0	0	1	1	9	2	10	8	1	4	8	6	2	0
284399	4.73998	0	0	0	336	2	2	5	1	4	2	14	113	14	6	9	72	3	1	16	4	81	6	24	4	9	1	9	6	0	3	0	0	2	0	0	6	4	1	8	2	7	3	6	0	7	1	1	1
285411	4.75685	0	0	2	337	1	0	4	1	1	1	8	123	21	3	5	56	1	0	11	6	65	3	27	2	2	1	5	6	2	0	1	0	0	1	6	0	3	0	7	0	3	2	2	0	5	1	0	1
286423	4.77372	0	0	0	354	1	2	10	5	3	4	6	123	21	2	10	51	3	0	20	6	87	0	24	1	0	1	4	3	1	1	2	0	1	6	5	0	3	2	7	2	7	4	0	0	8	0	0	5
287436	4.7906	0	0	0	309	0	2	14	3	9	6	4	110	16	6	6	52	3	1	16	4	79	3	20	1	8	1	6	8	2	0	1	2	0	1	0	0	3	0	3	1	7	0	2	0	6	0	0	1
288448	4.80747	0	1	4	314	0	2	8	4	3	3	12	121	17	5	0	61	5	2	20	4	76	10	28	2	1	2	7	7	4	0	0	0	0	1	0	0	8	4	6	5	5	4	0	3	5	0	3	0
289460	4.82433	0	1	3	308	0	0	7	7	1	5	10	114	9	7	4	75	2	5	12	9	88	3	25	1	1	1	18	0	5	1	0	0	0	0	1	1	1	1	4	1	1	4	0	0	5	3	0	0
290472	4.8412	0	0	0	369	0	0	6	0	3	6	14	111	14	2	12	54	1	0	20	5	78	0	28	6	3	1	6	3	3	1	0	0	1	3	2	0	3	3	5	1	2	2	0	0	3	2	0	11
291484	4.85807	0	0	0	346	1	3	8	9	2	9	11	111	14	3	6	66	1	1	7	6	84	4	22	1	1	0	9	0	0	1	0	2	1	0	10	0	2	0	7	1	5	1	0	0	3	2	0	3
292496	4.87493	0	0	0	339	0	2	2	6	1	1	10	91	6	3	11	77	0	0	8	7	63	9	26	2	2	2	10	0	4	0	4	1	0	0	5	4	2	0	7	0	1	4	1	0	10	3	0	6
293509	4.89182	0	0	4	315	0	3	4	2	2	2	9	117	7	8	5	78	0	0	11	10	67	5	22	0	0	2	2	6	1	0	1	2	3	0	4	10	1	1	3	1	2	3	4	0	10	3	2	0
294521	4.90868	0	1	0	314	0	1	12	1	1	2	10	114	16	1	2	54	1	0	14	7	63	4	26	7	1	1	7	1	0	0	2	0	5	1	0	3	8	0	10	2	3	0	2	0	9	1	0	0
295533	4.92555	0	0	0	349	0	1	4	3	3	1	11	119	22	8	6	52	1	1	16	7	75	5	18	7	1	2	6	3	0	2	2	0	0	0	2	1	5	1	6	0	9	0	0	1	10	0	3	1
296545	4.94242	0	0	0	297	1	2	14	5	4	2	11	116	20	6	9	64	2	0	17	3	65	7	18	4	0	0	9	4	0	1	2	0	0	1	1	3	0	1	9	4	5	6	0	2	4	2	0	1
297557	4.95928	0	5	0	313	0	0	9	6	5	4	7	114	8	3	6	55	0	0	9	3	82	3	33	1	9	5	7	1	7	0	2	0	0	0	2	2	1	2	4	0	3	2	3	0	11	1	2	1
298570	4.97617	0	0	0	324	0	0	12	4	3	6	5	140	19	7	1	70	2	1	18	3	56	6	20	0	3	0	6	4	7	1	0	0	0	0	0	0	2	1	12	3	3	4	0	0	7	2	0	5
299582	4.99303	0	0	0	330	0	0	10	2	1	2	13	108	13	5	0	65	4	2	8	9	51	4	15	2	0	2	4	2	1	0	3	0	4	0	0	0	4	2	1	1	2	9	1	0	4	6	2	2
300594	5.0099	0	4	0	334	0	0	10	2	3	6	16	122	17	5	10	59	0	0	16	6	69	10	22	2	2	2	6	1	3	1	0	1	4	1	0	0	5	1	9	0	13	2	2	0	14	0	0	0
301606	5.02677	0	2	0	346	0	0	11	4	2	2	7	92	17	2	0	44	3	0	17	0	70	6	23	1	5	1	10	5	2	1	0	0	0	0	0	0	12	0	3	3	0	3	0	0	9	2	0	4
302618	5.04363	0	0	1	317	0	2	4	2	1	1	11	121	13	3	5	68	5	0	12	16	51	9	14	3	2	2	2	7	6	0	0	0	0	0	3	0	1	3	5	4	0	11	0	0	9	4	3	0
303630	5.0605	0	0	0	274	0	0	6	8	4	0	12	116	13	3	3	59	5	3	11	4	58	2	28	2	3	1	16	3	1	0	1	1	0	3	0	3	7	3	14	2	4	0	4	1	8	0	0	0
304643	5.07738	0	0	1	348	0	0	5	1	3	3	15	94	10	6	8	92	0	0	11	5	49	5	16	4	4	4	10	5	1	0	4	1	1	1	2	0	1	0	12	4	5	4	1	2	20	0	2	0
305655	5.09425	0	0	0	339	0	0	2	7	3	1	8	113	21	5	4	73	0	0	11	5	59	1	24	0	5	1	4	2	3	0	4	0	2	2	2	2	0	5	0	4	7	8	3	0	14	0	2	2
306667	5.11112	0	0	1	329	1	0	5	3	0	1	11	118	10	2	5	56	1	0	18	7	49	4	15	4	5	1	9	6	1	0	0	2	2	1	3	2	1	1	10	1	4	0	3	0	5	0	1	0
307679	5.12798	0	0	1	335	0	0	10	1	3	1	10	95	16	4	2	63	1	1	10	6	57	1	15	1	0	3	4	7	2	0	6	0	5	0	2	2	7	0	5	1	5	3	0	1	2	0	3	0
308691	5.14485	0	0	0	336	0	1	5	0	2	3	10	114	14	6	9	85	2	0	12	11	64	7	19	4	0	2	14	6	0	2	0	0	0	1	5	0	3	0	6	3	10	0	1	1	7	0	3	0
309704	5.16173	0	0	1	313	0	4	7	0	2	4	15	101	12	4	9	60	1	1	11	7	70	3	17	2	2	3	9	4	0	0	0	0	0	0	0	0	8	3	8	2	4	5	2	0	9	2	0	0
310716	5.1786	0	0	0	307	0	1	6	1	2	0	18	117	16	11	12	49	2	0	19	11	26	4	18	4	4	2	13	3	4	0	0	2	1	0	2	0	0	0	12	1	6	0	5	0	2	4	1	1
311728	5.19547	0	1	0	297	1	1	9	4	3	2	8	104	16	8	9	58	2	0	7	7	71	8	26	2	6	2	16	4	1	0	0	1	0	1	1	1	0	5	4	2	3	1	0	0	6	0	1	0
312740	5.21233	0	0	0	319	2	2	2	9	0	0	9	140	14	6	4	69	2	0	14	9	58	0	21	2	2	2	7	2	6	0	0	0	0	0	0	0	5	2	12	3	12	5	1	1	4	0	1	0
313752	5.2292	0	0	1	317	0	2	2	2	1	1	6	116	11	0	11	65	2	2	11	3	61	8	23	2	1	0	10	4	2	1	1	1	1	0	4	2	4	1	4	4	2	2	4	0	8	0	7	5
314764	5.24607	0	1	0	349	2	1	1	1	2	0	10	95	13	7	4	26	1	0	16	3	59	2	20	6	6	2	11	0	1	0	1	0	7	1	0	2	4	1	5	0	4	0	2	0	6	3	0	2
315777	5.26295	0	4	3	299	2	1	5	0	2	2	9	97	15	3	5	78	0	0	11	8	48	2	26	2	4	6	10	11	1	0	0	0	4	0	1	0	5	0	9	4	2	10	0	0	6	0	4	0
316789	5.27982	0	0	0	375	2	0	8	1	1	0	10	115	6	8	6	63	1	3	16	4	62	3	12	3	1	1	8	1	5	3	3	0	0	3	0	0	3	3	10	4	5	8	0	3	15	3	0	3
317801	5.29668	0	0	0	309	0	0	10	1	4	2	13	123	15	7	5	65	3	2	15	4	58	4	15	4	7	0	1	7	5	1	1	0	0	3	5	0	2	2	6	1	5	1	1	0	9	1	3	0
318813	5.31355	0	0	0	282	4	2	7	6	3	1	8	117	13	0	8	81	4	1	14	9	49	0	18	0	2	1	9	4	8	0	2	0	2	0	0	0	1	1	6	0	5	2	3	2	11	0	7	0
319825	5.33042	0	0	0	333	2	4	8	0	3	5	12	114	11	1	4	58	0	0	4	5	61	0	21	10	4	3	7	3	7	5	1	3	1	0	1	2	1	3	3	3	4	2	1	2	5	0	2	0
320838	5.3473	0	1	1	318	0	1	2	3	3	5	18	136	18	9	10	63	0	1	20	7	45	3	24	5	4	3	4	6	1	1	0	0	1	1	3	0	7	3	6	3	6	5	0	1	10	1	2	2
321850	5.36417	0	0	0	276	0	0	4	3	1	2	11	118	12	4	7	74	8	0	9	4	29	2	17	4	2	3	12	1	0	3	0	1	1	1	0	0	2	1	9	2	2	5	0	0	13	6	1	1
322862	5.38103	0	0	0	358	0	1	7	0	1	1	14	123	4	9	3	82	2	0	9	4	28	3	26	4	3	2	7	4	6	0	1	1	0	0	3	0	2	0	9	3	6	4	5	0	9	0	1	2
323874	5.3979	0	0	0	286	2	0	3	2	2	1	12	109	21	11	8	68	0	0	11	3	40	3	19	3	2	4	11	3	5	1	2	2	0	2	2	4	1	0	9	7	4	5	0	0	14	0	0	0
324886	5.41477	0	0	0	376	3	0	6	1	3	4	7	95	25	5	3	73	0	1	14	3	47	8	18	1	8	1	11	2	1	0	3	0	1	0	0	0	2	1	6	0	5	2	0	0	7	1	1	2
325898	5.43163	0	0	0	344	1	2	10	1	3	4	5	118	4	5	4	59	0	0	8	8	20	6	28	3	2	2	4	2	2	1	0	0	0	1	3	0	10	0	6	2	12	10	3	1	4	3	1	0
326911	5.44852	0	0	0	313	0	1	8	2	2	1	13	117	12	1	2	78	0	0	7	2	28	3	21	6	0	1	5	0	5	0	0	0	0	2	5	5	3	2	3	0	2	1	1	0	10	0	3	0
327923	5.46538	0	0	0	315	0	1	3	2	0	3	5	112	17	5	0	76	0	0	8	8	31	1	19	3	2	4	4	4	0	1	1	0	1	0	0	4	1	1	4	1	5	6	0	7	8	0	3	2
328935	5.48225	0	0	1	304	0	2	0	3	0	8	2	134	16	10	3	58	0	0	7	1	38	6	27	1	0	1	7	5	0	1	0	1	2	0	1	0	2	0	8	3	3	4	2	0	19	0	0	0
329947	5.49912	0	0	1	293	0	3	5	3	10	2	8	122	13	2	13	92	2	0	12	4	17	4	19	2	1	5	4	4	5	4	4	0	0	0	0	0	3	7	6	0	2	1	3	1	0	3	0	5
330959	5.51598	0	0	0	323	0	0	6	0	1	4	6	111	26	7	2	59	0	0	9	3	25	9	20	0	4	2	5	7	5	2	0	4	0	1	2	0	1	0	9	7	2	3	2	1	12	4	0	2
331972	5.53287	0	0	0	325	0	2	3	2	2	6	0	143	16	6	6	92	5	0	11	3	40	7	24	4	0	1	6	3	0	0	2	0	1	1	3	1	1	2	6	1	3	0	1	1	12	2	4	0
332984	5.54973	0	0	3	304	1	2	5	2	3	6	6	109	14	8	5	71	0	4	5	5	43	5	25	4	4	0	8	9	0	0	0	0	2	1	0	0	5	0	5	1	2	1	0	0	2	3	1	0
333996	5.5666	0	1	0	353	0	0	7	3	4	3	5	130	14	2	5	79	1	2	13	3	41	7	17	3	2	3	10	5	1	2	0	0	1	0	3	4	4	2	2	0	4	0	1	4	1	0	2	0
335008	5.58347	0	0	0	336	0	1	4	5	3	1	14	106	14	4	5	58	3	0	2	15	18	8	18	4	1	0	8	4	0	1	0	1	0	0	2	0	3	8	14	7	5	2	0	0	5	1	1	0
336020	5.60033	0	0	1	314	1	6	1	4	1	1	7	101	13	3	4	78	7	0	7	6	20	3	15	5	5	1	6	7	2	1	0	0	1	0	2	1	2	1	3	3	2	0	1	1	4	1	1	1
337032	5.6172	0	0	1	339	0	1	6	4	1	4	5	124	17	10	8	82	2	0	13	7	23	0	20	0	0	2	7	2	0	0	0	0	0	1	2	1	5	0	7	3	0	0	1	0	3	2	2	0
338045	5.63408	0	0	1	324	0	4	2	4	5	6	17	124	10	4	5	110	5	0	8	10	50	4	29	2	2	0	5	9	0	0	1	0	0	0	0	0	2	1	6	1	3	4	0	0	11	2	2	0
339057	5.65095	0	0	0	372	0	0	2	3	0	1	13	110	11	4	5	67	1	0	9	4	52	1	21	2	0	3	14	9	0	5	0	0	0	3	1	1	4	2	13	0	3	2	1	0	10	0	0	2
340069	5.66782	0	0	0	315	0	0	4	1	1	3	10	118	18	9	3	72	1	1	11	5	61	3	17	0	7	2	8	5	4	1	0	0	0	0	4	0	1	0	5	0	0	2	3	1	8	1	3	1
341081	5.68468	0	0	0	370	0	0	4	4	1	5	6	119	10	3	6	89	0	0	6	3	44	6	15	2	4	1	13	3	6	2	0	0	0	0	0	0	0	5	6	4	3	8	0	1	3	2	2	0
342093	5.70155	0	0	0	314	0	1	5	4	0	1	10	123	17	8	9	94	3	0	8	7	40	6	23	5	4	2	9	6	5	0	0	1	3	1	1	0	0	2	4	3	5	5	2	0	7	3	1	1
343106	5.71843	0	0	1	322	0	0	4	1	4	2	21	110	18	0	1	72	7	4	5	5	35	1	19	0	9	1	8	4	2	0	0	0	1	2	3	1	1	0	7	0	5	1	5	0	7	0	3	0
344118	5.7353	0	0	0	337	0	4	2	1	3	5	12	107	12	5	6	79	1	1	14	6	26	4	16	0	0	3	9	8	1	1	0	0	1	2	0	2	8	1	6	2	4	4	1	0	4	2	5	0
345130	5.75217	0	0	2	312	0	3	3	0	5	0	11	95	13	3	6	76	1	0	8	3	28	7	19	0	0	1	10	6	1	4	4	0	0	0	1	2	2	1	13	2	3	0	0	0	8	0	5	4
346142	5.76903	0	0	0	321	0	1	5	2	3	3	9	96	16	3	5	79	0	0	7	4	29	6	11	3	2	1	10	3	0	0	0	1	1	1	0	0	0	5	5	1	3	2	2	0	6	1	0	2
347154	5.7859	0	0	0	285	0	1	6	0	0	3	11	97	9	3	9	82	0	0	8	4	51	1	15	5	2	0	17	8	2	2	2	0	1	1	1	4	0	2	5	2	5	1	2	0	4	0	0	0
348166	5.80277	0	0	0	335	0	5	6	6	3	3	14	108	10	10	5	70	2	0	11	3	39	6	14	4	0	0	7	1	0	1	3	0	0	0	0	0	2	2	9	2	2	0	4	0	3	0	0	1
349179	5.81965	0	0	1	341	2	3	0	2	5	1	3	124	10	2	5	79	3	0	14	5	24	3	14	3	1	1	9	10	2	0	5	0	0	4	2	0	2	1	16	0	2	4	4	0	3	0	5	3
350191	5.83652	0	3	0	302	0	1	4	2	0	4	12	111	12	2	14	84	2	0	11	3	38	4	14	3	5	3	6	3	0	0	0	0	0	0	1	0	1	1	6	2	0	0	0	0	4	1	0	4
351203	5.85338	0	5	0	326	0	0	4	1	5	3	18	103	18	15	4	61	2	3	3	2	26	6	21	1	3	0	7	13	5	0	0	1	1	1	3	2	1	0	12	0	2	4	5	0	5	1	0	1
352215	5.87025	0	2	0	281	0	0	4	8	3	6	7	103	8	7	16	91	4	0	9	1	25	5	17	2	4	2	14	2	1	2	1	1	1	0	0	1	2	0	9	1	8	1	5	1	5	2	2	0
353227	5.88712	0	0	0	306	0	2	2	1	2	0	6	101	15	3	12	104	4	0	12	6	31	2	11	3	6	2	7	0	5	1	0	0	0	0	0	6	5	3	9	3	3	0	0	3	7	5	0	0
354240	5.904	0	0	0	329	1	0	2	1	4	2	4	133	9	2	2	87	1	0	17	2	30	9	15	2	1	1	6	1	0	0	3	0	3	1	1	0	0	3	8	3	3	1	4	2	4	1	0	0
355252	5.92087	0	0	3	310	0	0	5	4	2	0	8	104	13	3	10	79	3	0	6	4	15	3	17	0	4	1	4	0	1	0	1	0	1	0	0	1	2	0	6	4	2	5	6	0	10	1	1	2
356264	5.93773	0	4	0	302	3	0	0	8	0	0	6	106	16	5	5	76	3	0	6	0	29	5	12	4	1	0	7	1	3	2	0	0	0	0	1	0	1	4	11	2	1	0	7	0	7	0	1	2
357276	5.9546	0	0	0	317	0	5	3	9	3	3	8	107	13	1	3	104	2	0	5	6	12	8	10	1	0	1	10	4	1	2	1	0	0	3	0	1	2	0	9	4	0	4	0	0	11	4	1	3
358288	5.97147	0	0	2	326	0	0	0	3	0	2	13	102	18	2	6	93	1	0	10	2	32	7	9	0	0	2	2	8	1	0	1	0	0	1	1	0	2	3	11	0	4	1	1	0	9	1	2	0
359300	5.98833	0	0	0	305	5	1	8	1	2	5	8	117	22	8	6	83	2	2	7	4	25	6	28	2	5	3	7	1	2	1	5	0	0	1	0	0	1	1	7	0	5	0	0	0	4	3	0	2
360313	6.00522	0	0	0	297	0	2	3	4	1	6	10	95	12	3	5	97	3	1	7	4	26	1	7	1	0	4	5	5	1	1	1	0	2	0	1	0	8	0	3	0	7	3	0	1	3	4	0	3
361325	6.02208	0	0	0	315	0	0	0	3	2	1	15	97	14	7	4	70	3	0	10	1	30	3	22	1	3	3	4	2	3	0	0	0	0	0	0	0	3	0	5	4	4	1	2	0	3	4	1	1
362337	6.03895	0	0	2	310	0	0	4	3	0	0	11	116	9	5	6	76	0	0	5	2	28	1	9	2	3	1	3	3	3	0	2	2	0	1	5	0	3	1	7	1	2	0	3	1	14	0	1	1
363349	6.05582	0	0	1	313	0	0	3	0	0	3	11	116	15	3	8	72	2	0	4	4	23	5	10	2	0	1	12	1	1	0	0	0	1	1	1	3	0	0	2	1	3	5	2	1	8	0	6	0
364361	6.07268	0	0	0	313	0	1	0	4	0	0	12	106	8	6	9	115	2	0	10	4	27	1	22	1	0	1	2	2	4	1	1	0	0	0	1	1	0	2	4	3	1	0	4	0	12	1	0	0
365374	6.08957	0	1	0	314	1	1	4	1	2	2	11	110	7	5	4	87	0	1	9	2	25	7	18	1	7	0	9	3	2	0	2	0	1	1	0	3	0	0	16	3	4	0	0	0	10	0	5	1
366386	6.10643	0	1	0	332	0	1	1	2	0	2	9	123	12	2	5	91	0	0	4	3	22	2	22	6	0	0	10	2	0	2	0	1	0	1	2	1	2	0	13	0	7	2	6	0	9	1	0	1
367398	6.1233	0	0	0	302	0	2	4	0	5	3	14	120	12	5	9	85	1	0	2	2	24	10	13	3	2	4	9	2	1	1	0	0	1	0	0	3	0	0	9	0	2	1	0	0	10	0	1	0
368410	6.14017	0	0	4	321	0	1	1	2	0	6	10	101	13	9	8	89	1	0	4	2	25	3	13	1	7	2	11	3	0	5	4	0	0	0	1	0	0	0	4	0	4	6	0	0	24	3	1	0
369422	6.15703	0	2	0	294	0	1	3	1	3	5	11	114	10	7	3	83	0	0	4	3	22	2	11	0	0	1	6	0	3	0	0	0	1	1	0	1	2	2	5	1	5	1	0	0	20	1	0	1
370434	6.1739	0	0	3	319	2	1	2	1	1	4	11	110	13	0	4	75	6	0	3	3	25	3	18	0	1	0	13	8	1	1	1	0	6	1	0	2	6	1	5	11	4	7	0	0	15	7	1	1
371447	6.19078	0	0	2	324	0	1	2	1	0	2	23	138	10	2	7	89	4	2	13	3	22	1	17	6	4	1	4	1	2	1	2	0	0	2	5	0	3	2	9	0	10	0	6	0	9	2	0	2
372459	6.20765	0	0	0	288	0	0	2	2	4	4	8	104	16	3	2	87	1	0	4	4	34	4	12	5	9	1	3	1	5	1	0	3	0	0	1	0	0	4	6	3	5	0	0	0	6	1	2	0
373471	6.22452	0	0	1	330	0	2	4	2	2	2	11	100	17	3	6	69	5	0	5	3	26	10	15	2	0	1	16	7	1	0	0	1	0	0	0	1	1	0	6	3	4	2	0	2	6	2	3	0
374483	6.24138	0	0	1	322	0	0	6	0	2	3	15	108	10	10	2	83	4	0	4	5	26	4	8	1	0	1	9	6	6	0	0	0	0	0	4	4	11	0	6	3	7	9	0	0	14	3	1	0
375495	6.25825	0	0	0	333	0	3	3	3	1	5	15	110	16	1	5	73	1	0	5	2	25	4	7	0	0	6	11	13	2	0	1	0	0	1	2	2	4	0	3	1	1	1	0	0	7	1	1	0
376508	6.27513	0	5	0	294	1	0	1	4	1	0	19	131	15	8	5	79	0	3	11	0	25	4	12	0	7	1	9	5	4	0	1	0	0	0	2	0	5	0	5	0	4	3	1	0	3	1	3	2
377520	6.292	0	0	0	305	0	1	4	0	0	0	10	111	10	5	10	79	3	0	10	5	29	1	23	3	2	2	9	1	6	1	4	0	0	1	1	0	0	1	3	3	7	8	0	0	15	2	0	3
378532	6.30887	0	0	3	342	0	0	3	2	0	0	8	104	9	9	2	82	0	0	6	8	27	9	15	3	4	2	9	11	0	2	1	3	0	3	2	1	2	0	3	1	6	9	0	0	9	0	1	4
379544	6.32573	0	0	0	312	0	1	4	2	1	0	11	112	7	2	8	112	1	0	4	3	27	4	13	10	11	2	9	1	11	1	1	0	0	2	0	0	5	0	14	3	3	3	2	0	9	3	1	4
380556	6.3426	0	1	2	303	0	5	4	1	2	0	10	111	14	4	5	112	1	1	5	3	26	4	11	3	0	5	6	3	5	0	0	0	0	3	0	0	9	0	7	2	7	1	0	0	9	4	0	1
381568	6.35947	0	1	4	280	2	4	2	0	5	1	7	105	22	4	1	90	5	0	9	2	26	0	9	0	1	2	8	5	1	1	0	0	2	0	3	0	5	0	4	3	3	7	0	0	8	4	3	0
382581	6.37635	0	0	0	293	0	3	2	2	4	6	7	140	11	3	8	76	4	0	3	4	18	2	15	0	1	0	6	3	4	1	1	0	1	0	2	4	0	2	5	1	3	1	4	0	12	4	1	0
383593	6.39322	0	0	0	283	0	3	3	0	0	3	5	125	14	3	4	92	5	0	4	3	22	2	16	0	2	0	4	3	7	0	1	0	0	0	2	1	1	1	7	2	2	3	0	0	8	0	6	0
384605	6.41008	0	0	0	320	1	0	1	2	3	7	5	97	15	6	8	97	1	0	5	7	28	0	17	0	1	3	11	6	0	0	1	0	0	0	2	3	1	0	6	1	3	1	6	0	12	0	4	0
385617	6.42695	0	0	1	302	0	0	4	0	1	1	7	114	17	7	4	94	4	0	3	4	24	2	27	2	2	4	5	5	1	0	0	0	0	0	1	0	3	0	7	0	3	1	5	0	4	1	1	0
386629	6.44382	0	0	1	305	0	1	1	3	1	1	7	102	18	4	5	73	1	0	6	0	11	3	14	5	0	0	5	3	3	0	0	0	0	3	0	0	2	2	12	3	2	2	0	1	3	1	4	0
387642	6.4607	0	1	0	274	1	3	1	4	3	4	5	120	10	0	7	95	0	0	2	7	25	3	15	1	0	3	5	5	3	1	1	0	2	0	0	0	6	2	7	4	4	2	0	1	9	4	0	0
388654	6.47757	0	0	0	311	4	0	1	1	3	3	8	111	11	8	4	102	5	1	1	2	19	3	18	1	5	1	6	7	2	1	1	0	0	3	0	1	1	0	3	3	5	1	2	1	9	1	1	2
389666	6.49443	0	0	0	279	0	0	3	0	0	1	13	101	9	4	0	102	4	0	5	2	21	8	9	1	2	0	12	4	3	1	0	0	0	0	0	0	1	0	4	0	3	0	3	0	8	0	6	0
390678	6.5113	0	0	0	282	0	1	2	1	1	8	9	108	12	5	10	59	4	0	4	3	18	3	15	1	5	0	4	2	4	0	0	0	1	0	0	1	3	0	18	4	4	3	2	0	9	5	1	0
391690	6.52817	0	0	1	333	0	3	8	1	7	0	10	97	8	1	0	77	1	0	3	1	31	1	13	1	2	1	4	7	2	2	0	0	0	2	3	2	6	0	12	0	9	2	0	2	19	0	1	0
392702	6.54503	0	0	1	280	0	0	5	6	4	4	13	101	10	9	6	81	0	0	7	0	30	3	17	2	2	0	8	2	4	0	6	0	0	1	2	0	1	1	13	0	3	5	0	0	14	0	1	3
393715	6.56192	0	0	0	279	0	0	1	0	0	7	7	92	11	10	4	66	0	0	4	4	20	1	5	0	2	0	4	6	1	0	1	0	1	2	6	1	4	2	7	4	0	7	0	1	1	1	1	0
394727	6.57878	0	1	0	286	0	2	0	3	1	1	6	107	24	3	3	64	2	0	4	5	24	2	13	3	0	0	6	1	2	1	0	4	0	2	0	2	1	0	2	4	2	5	3	0	11	0	0	2
395739	6.59565	0	0	2	264	1	2	2	4	2	0	6	110	12	7	2	72	0	0	10	1	29	2	19	0	0	1	10	2	6	1	0	1	0	3	4	0	2	0	8	0	1	5	3	0	11	0	2	2
396751	6.61252	0	0	0	304	0	0	1	1	0	3	5	116	10	2	5	102	2	1	11	0	24	0	15	0	3	0	7	0	2	0	3	0	1	0	2	1	0	4	11	0	2	1	3	1	9	0	1	2
397763	6.62938	0	0	0	337	0	1	3	0	1	1	7	104	13	7	7	87	0	1	6	7	29	8	19	0	1	1	8	3	4	1	0	0	0	1	1	0	2	4	3	0	3	0	0	0	8	1	2	1
398776	6.64627	0	1	0	314	0	5	0	7	0	1	9	117	22	3	8	85	0	0	6	0	32	1	14	0	3	0	12	4	0	3	1	0	0	5	5	2	0	1	5	1	4	0	3	0	9	0	2	2
399788	6.66313	0	0	0	260	0	0	3	1	2	3	14	120	11	5	5	57	2	0	5	2	24	1	9	2	2	4	7	8	2	0	0	0	0	0	0	2	3	0	10	5	3	3	1	1	11	0	4	0
400800	6.68	0	0	1	299	0	2	1	2	0	3	9	110	5	2	9	78	3	0	2	2	26	3	8	0	3	4	8	3	0	1	0	0	1	0	1	0	2	0	9	6	1	1	2	0	9	0	0	2
401812	6.69687	0	0	0	295	0	1	3	3	3	2	8	103	11	2	7	96	2	0	10	2	15	2	17	1	2	1	12	1	0	3	0	1	0	0	0	3	4	0	10	2	2	3	2	1	3	3	1	1
402824	6.71373	0	0	0	334	0	0	2	2	0	0	5	100	18	4	6	88	4	0	4	1	18	1	9	1	5	2	7	7	3	2	2	0	0	0	4	0	0	1	4	4	6	1	0	0	7	2	6	3
403836	6.7306	0	0	0	287	1	1	0	0	6	0	13	116	10	3	5	88	2	0	2	3	31	1	13	1	10	0	11	5	3	0	1	1	0	1	1	1	2	0	3	5	5	1	0	0	3	2	0	0
404849	6.74748	0	2	2	321	0	1	3	5	0	3	8	118	12	5	4	86	3	0	8	2	23	3	13	2	5	0	1	3	4	0	0	0	0	0	5	0	4	0	6	2	10	4	4	0	7	0	4	3
405861	6.76435	0	0	0	283	0	0	2	3	2	6	15	134	8	3	10	74	0	0	1	4	28	4	15	11	2	4	1	1	1	1	3	0	1	6	1	5	0	0	4	5	7	0	1	0	2	1	0	0
406873	6.78122	0	0	0	301	0	1	0	0	4	3	10	95	12	2	5	93	0	0	4	1	21	1	14	1	0	4	12	3	3	0	2	0	6	0	3	1	2	0	8	0	2	4	1	1	3	0	1	0
407885	6.79808	0	0	0	307	0	0	3	3	0	1	6	91	13	3	10	83	3	1	12	1	23	2	11	3	0	0	8	3	3	0	0	0	2	0	2	0	11	1	6	8	0	6	2	0	5	1	5	0
408897	6.81495	0	0	0	308	0	0	0	5	2	6	13	95	11	1	0	115	1	3	0	4	21	4	15	1	1	1	8	4	1	1	0	0	0	0	0	0	0	0	5	0	4	1	0	2	14	0	0	1
409910	6.83183	0	0	0	302	0	0	3	3	2	2	9	132	13	8	15	74	1	2	9	0	21	4	10	4	8	2	7	5	3	0	2	0	0	1	0	5	4	0	9	6	0	9	4	0	11	3	2	0
410922	6.8487	0	0	0	318	0	2	2	4	0	4	20	115	17	6	10	80	2	0	3	0	23	2	12	6	2	1	10	8	3	1	1	0	5	0	1	0	4	0	6	1	14	2	1	0	5	3	0	0
411934	6.86557	0	0	0	311	0	1	3	4	2	1	14	123	17	0	8	73	2	0	9	1	22	6	16	0	6	0	2	8	3	0	1	0	2	1	2	0	1	2	6	1	6	4	2	0	4	1	3	2
412946	6.88243	0	0	0	269	0	1	0	1	2	1	9	120	19	2	4	95	1	4	4	2	22	0	3	0	5	1	5	6	3	0	2	0	2	2	2	3	0	0	7	2	3	3	0	1	2	2	6	2
413958	6.8993	0	0	1	323	1	0	10	1	0	2	0	121	12	0	6	92	3	0	11	1	14	5	9	1	1	1	7	6	3	1	0	1	4	0	0	0	4	3	8	5	1	5	0	0	8	5	3	1
414970	6.91617	0	1	0	310	0	0	0	7	0	0	6	106	16	10	4	123	2	0	6	0	18	1	17	0	3	0	3	6	3	3	0	1	0	0	2	0	3	8	7	0	3	1	0	0	10	0	0	0
415983	6.93305	0	0	0	319	0	0	4	3	2	1	5	113	13	3	4	99	2	0	3	2	25	1	10	1	2	0	5	0	7	1	0	0	0	0	5	0	1	0	11	0	6	0	0	0	16	1	1	0
416995	6.94992	0	0	0	285	0	2	0	3	2	0	8	105	9	3	6	82	1	1	6	2	21	13	7	1	3	2	8	2	9	0	1	0	0	1	2	2	3	0	3	0	1	2	0	0	2	0	4	2
418007	6.96678	0	0	0	300	1	0	2	2	1	0	17	102	7	10	9	97	1	1	6	10	26	5	13	3	3	1	3	6	4	1	0	0	1	0	1	3	5	0	5	5	3	1	1	0	4	0	1	1
419019	6.98365	0	0	0	296	0	0	0	0	1	1	8	122	25	4	1	81	0	2	2	1	37	5	8	5	2	0	4	4	2	3	0	1	0	4	0	1	0	1	6	2	5	2	0	0	16	2	4	0
420031	7.00052	0	0	0	288	0	3	2	1	0	0	7	113	9	5	3	85	4	0	4	2	13	1	12	2	5	3	4	2	0	0	2	1	0	2	3	0	2	0	15	6	4	0	1	0	13	2	3	4
421044	7.0174	0	0	1	313	0	1	0	1	3	2	9	93	10	1	5	89	4	0	2	1	15	4	12	3	5	4	4	1	0	0	4	0	1	1	1	4	0	3	6	2	3	2	1	0	8	1	1	2
422056	7.03427	0	0	0	320	0	0	3	6	8	2	14	100	10	4	13	121	3	0	2	2	31	2	15	1	0	1	10	3	1	0	0	1	4	0	0	3	0	2	5	0	3	0	2	0	7	1	3	0
423068	7.05113	0	0	0	276	0	2	1	1	0	2	5	83	9	7	6	109	6	3	7	4	20	1	15	1	0	4	5	5	0	1	0	1	0	0	0	0	6	2	7	3	0	3	1	0	9	1	1	0
424080	7.068	0	0	0	260	0	1	1	0	1	2	13	135	10	3	5	93	5	0	6	0	16	2	14	1	1	0	5	0	9	0	0	1	1	0	1	2	1	1	6	0	4	0	0	1	5	0	1	0
425092	7.08487	0	1	1	272	0	1	4	2	1	0	7	99	15	6	4	93	4	0	4	3	20	10	8	1	4	1	2	3	6	0	5	0	2	0	0	1	1	0	6	0	3	0	1	0	7	0	1	0
426105	7.10175	0	0	2	284	0	3	2	2	0	5	8	135	13	8	6	82	0	0	4	3	19	0	7	0	0	0	7	1	5	0	0	0	2	0	0	0	4	0	14	4	11	10	0	0	8	0	3	0
427117	7.11862	0	0	0	276	0	1	1	1	1	0	9	90	18	6	7	111	3	0	6	2	18	4	18	0	11	2	2	2	5	0	5	0	1	0	0	2	1	0	11	0	9	2	0	0	3	1	0	3
428129	7.13548	0	0	0	303	0	5	1	0	0	1	6	106	7	4	7	103	4	0	3	1	19	6	8	8	6	3	11	5	4	1	2	1	0	0	1	0	7	0	7	3	4	0	1	2	12	3	1	2
429141	7.15235	0	0	0	292	0	0	2	2	0	3	7	117	3	7	11	94	2	0	4	0	23	2	16	0	1	1	8	1	1	1	3	0	1	1	5	0	0	0	5	0	3	0	2	0	8	1	3	3
430153	7.16922	0	0	0	288	0	1	3	5	2	2	14	100	18	4	3	112	3	0	2	0	16	3	8	5	4	6	12	2	4	1	2	0	0	1	2	1	8	1	12	5	2	8	3	0	9	0	0	9
431165	7.18608	0	0	0	279	0	1	3	5	1	0	0	131	14	14	4	86	3	0	5	0	23	1	12	3	4	0	4	7	4	1	1	0	3	0	0	0	0	1	8	5	4	2	0	1	17	4	2	0
432178	7.20297	0	1	0	302	1	2	2	1	1	3	15	111	14	4	5	82	7	2	2	0	19	1	9	2	3	0	6	1	4	0	1	1	1	1	0	0	2	0	10	3	6	2	2	0	19	0	0	0
433190	7.21983	0	1	0	290	0	2	1	1	0	2	8	114	5	1	6	88	4	0	8	5	21	0	13	4	4	2	5	6	1	0	1	0	0	1	2	0	5	3	9	4	5	4	0	2	9	2	3	2
434202	7.2367	0	0	0	313	0	2	5	0	2	4	7	83	11	4	6	105	4	1	8	4	21	1	7	5	3	1	5	2	2	0	1	0	1	1	5	3	4	2	3	7	1	7	1	0	20	2	1	3
435214	7.25357	0	0	0	300	0	0	1	2	0	6	6	129	8	7	5	109	0	0	9	2	20	4	8	0	9	1	4	0	9	0	0	0	0	0	0	3	0	0	6	3	6	1	3	0	7	1	1	3
436226	7.27043	0	0	0	306	0	0	1	2	1	1	13	110	6	3	9	117	1	1	3	4	19	0	8	1	4	3	12	8	1	0	2	0	1	3	5	1	2	4	4	1	7	1	0	0	8	0	1	2
437239	7.28732	0	0	0	305	0	1	3	0	4	2	11	99	17	1	2	107	3	0	9	5	18	0	9	4	1	6	17	6	0	1	2	0	3	0	4	1	0	2	5	0	8	0	4	1	10	1	1	1
438251	7.30418	0	0	2	285	0	5	2	0	2	0	14	109	9	1	0	101	1	0	3	1	13	1	11	0	0	3	1	1	7	0	2	0	0	0	5	0	0	2	18	0	1	3	2	0	4	1	1	0
439263	7.32105	0	0	0	318	0	1	1	0	1	4	12	108	10	1	6	106	3	0	2	3	25	11	5	1	1	5	10	5	0	0	2	0	1	1	1	1	3	6	9	0	4	4	1	0	14	3	1	1
440275	7.33792	0	0	2	300	0	1	2	2	2	2	8	112	10	4	10	88	2	0	3	1	29	4	16	2	3	1	4	1	2	3	0	0	3	3	1	5	7	2	3	3	2	0	2	0	9	5	2	4
441287	7.35478	0	0	0	258	0	2	0	1	0	2	8	95	3	1	11	106	0	2	4	2	10	2	9	0	4	2	4	5	2	0	0	0	0	1	2	0	0	1	2	1	6	2	1	0	12	4	1	0
442299	7.37165	0	2	2	308	0	1	0	0	0	1	12	133	7	3	5	99	0	0	5	0	22	6	12	1	1	1	9	2	7	0	1	0	2	0	2	0	0	0	5	1	6	0	0	0	13	1	6	0
443312	7.38853	0	0	1	286	0	3	1	0	3	4	14	107	13	12	5	61	4	1	2	1	17	10	20	3	4	3	3	3	6	0	0	0	0	2	2	2	10	0	9	1	5	3	1	1	12	4	0	0
444324	7.4054	0	0	0	326	0	0	2	0	0	2	11	139	20	5	3	97	2	2	1	2	15	7	12	3	0	0	4	3	0	1	0	0	1	0	0	2	1	1	6	0	0	2	1	0	8	0	3	7
445336	7.42227	0	0	0	281	0	2	2	2	1	6	10	125	11	4	8	121	1	0	5	2	18	2	9	4	1	2	5	0	0	0	2	0	0	2	0	0	3	3	7	1	4	3	1	0	7	1	1	2
446348	7.43913	0	0	0	299	0	1	4	3	2	4	16	108	19	6	7	89	4	1	4	2	23	6	6	3	5	0	14	3	9	0	1	0	0	0	0	0	2	4	3	7	5	2	0	0	10	1	0	1
447360	7.456	0	0	2	282	0	1	2	2	1	1	18	115	18	0	6	113	0	0	2	2	16	2	5	3	2	2	9	2	10	1	0	0	0	0	2	0	3	2	9	1	0	4	3	0	8	1	0	2
448373	7.47288	0	0	0	327	0	1	1	4	2	1	14	106	7	1	1	96	1	0	2	4	13	3	7	2	3	1	6	4	1	2	0	0	0	3	2	0	4	0	15	7	5	0	1	0	5	4	0	0
449385	7.48975	0	0	0	297	0	2	2	0	2	3	10	98	8	5	5	119	3	0	3	2	17	5	15	3	0	0	3	0	5	1	0	1	1	0	3	0	4	1	4	1	2	2	0	0	18	4	3	0
450397	7.50662	0	0	0	318	0	0	1	0	0	2	20	107	17	3	3	119	3	0	4	2	24	8	14	1	1	2	12	6	2	0	1	0	1	2	0	0	6	0	10	7	1	1	2	0	16	1	2	1
451409	7.52348	0	0	0	274	0	2	1	3	0	4	0	112	15	3	9	106	2	1	8	2	17	6	11	4	2	7	10	4	1	2	0	0	3	0	7	2	2	0	2	2	9	4	2	4	7	2	0	0
452421	7.54035	0	1	0	298	0	4	2	2	3	1	19	96	12	5	1	89	1	0	3	1	17	7	10	0	5	0	7	5	5	1	5	0	2	0	4	2	3	2	4	4	9	0	0	0	4	0	4	0
453433	7.55722	0	0	0	275	0	0	0	2	0	1	10	116	12	6	4	95	3	0	3	4	20	2	12	7	6	3	5	7	6	0	0	0	1	0	0	2	1	0	20	3	5	2	2	0	13	0	0	0
454446	7.5741	0	1	0	279	0	1	1	1	5	0	9	115	5	1	4	95	5	3	3	4	25	6	13	0	1	3	6	4	0	2	5	0	0	0	3	0	4	7	9	1	2	0	2	1	6	0	3	1
455458	7.59097	0	0	0	315	0	0	2	0	1	2	17	136	18	5	3	103	0	0	3	4	20	6	11	2	5	2	1	2	5	0	11	0	1	1	0	0	1	1	5	4	1	1	1	0	9	0	2	0
456470	7.60783	0	0	0	273	0	2	2	1	1	1	15	113	14	3	0	75	2	0	3	1	13	2	12	1	5	2	4	2	5	0	3	1	0	2	0	0	3	2	2	1	7	0	5	0	9	0	4	0
457482	7.6247	0	0	0	287	1	0	1	0	2	0	13	105	12	1	5	99	1	0	2	4	41	1	5	0	2	0	2	6	0	0	1	0	0	0	2	0	2	1	4	0	1	0	0	1	10	3	0	4
458494	7.64157	0	0	0	307	0	0	0	2	0	3	7	118	8	1	8	85	3	0	4	2	27	0	5	3	2	0	3	2	9	3	0	0	0	2	0	0	0	1	4	2	5	4	2	0	6	1	3	0
459507	7.65845	0	0	4	324	2	1	3	0	3	2	4	131	12	3	1	118	2	1	6	2	21	2	5	2	1	4	12	2	6	9	1	0	2	0	0	2	8	1	7	0	2	1	3	0	9	3	0	4
460519	7.67532	0	0	1	318	0	0	0	0	0	6	5	128	13	0	3	100	3	0	2	1	13	2	17	2	0	3	5	0	2	0	1	1	0	0	4	2	2	4	4	0	2	0	2	0	14	3	2	0
461531	7.69218	0	1	1	287	0	0	2	1	2	3	15	92	11	2	5	105	3	0	1	0	15	3	8	1	7	2	2	6	1	0	0	1	0	2	0	0	2	0	7	1	4	1	1	0	4	2	3	0
462543	7.70905	0	0	0	311	2	2	0	2	0	1	9	90	14	4	8	97	4	3	8	5	16	1	4	0	2	3	1	0	3	1	1	0	1	0	3	0	2	2	5	3	5	0	3	0	11	0	1	3
463555	7.72592	0	0	0	244	0	1	0	2	0	1	5	108	11	6	0	96	3	0	7	0	18	0	8	2	1	4	4	1	2	0	1	0	0	0	0	0	7	0	8	3	2	1	2	0	4	3	5	1
464567	7.74278	0	1	0	289	2	0	0	4	1	0	16	110	11	7	4	110	0	0	5	1	22	2	5	0	1	5	3	7	3	1	1	0	0	0	1	5	9	0	6	3	5	0	4	1	7	0	1	0
465580	7.75967	0	0	0	295	0	3	2	0	0	4	13	115	7	2	4	101	2	1	1	1	11	1	12	0	2	0	8	0	16	0	0	0	0	0	0	0	9	3	7	1	5	0	2	0	12	0	0	2
466592	7.77653	0	0	1	287	0	0	0	0	0	0	12	130	13	0	2	134	4	0	4	2	20	6	11	0	6	1	10	1	0	0	0	3	3	0	0	0	6	0	9	3	3	6	1	2	19	1	8	3
467604	7.7934	0	0	1	288	0	4	3	0	2	1	3	93	15	1	4	114	2	0	2	0	15	2	9	0	0	5	6	4	5	0	0	1	2	1	7	0	10	3	5	1	2	1	5	2	6	1	1	2
468616	7.81027	0	0	0	288	0	0	1	0	0	1	5	103	7	6	5	105	4	1	8	0	19	5	14	5	4	2	9	3	0	0	0	0	0	1	0	0	2	0	2	3	2	0	2	0	8	0	2	1
469628	7.82713	0	0	1	267	0	2	0	1	1	2	5	116	12	11	5	93	0	0	0	2	20	5	12	1	1	1	3	2	1	3	3	0	0	0	2	0	4	2	4	5	6	3	2	0	14	0	2	0
470641	7.84402	0	0	2	317	1	0	1	0	0	1	0	87	16	3	5	94	1	1	0	1	19	4	5	0	5	0	5	4	0	1	2	0	1	0	0	0	8	1	5	2	2	1	3	0	5	0	1	1
471653	7.86088	0	0	2	268	0	1	2	1	1	2	4	110	9	1	3	112	5	0	5	2	11	2	10	1	4	0	4	5	2	0	5	3	2	1	2	2	0	3	9	1	4	2	0	5	20	3	3	2
472665	7.87775	0	0	1	305	0	2	2	3	0	1	6	118	12	5	6	110	3	0	1	5	16	10	2	0	1	2	3	2	2	5	0	1	0	1	2	6	0	0	7	3	5	7	3	0	9	4	3	1
473677	7.89462	0	0	0	305	1	0	0	0	1	2	4	117	12	0	4	125	3	1	3	0	15	3	7	1	6	0	4	3	2	2	0	1	0	1	2	1	0	0	10	4	6	0	1	4	6	2	3	0
474689	7.91148	0	2	0	267	1	0	1	0	5	1	5	113	4	5	2	117	4	0	1	0	14	6	3	0	1	0	3	2	0	0	0	0	2	0	0	2	0	3	4	0	3	3	8	0	10	2	2	6
475701	7.92835	0	0	1	272	0	1	1	4	4	2	12	112	13	6	0	113	2	1	3	2	23	2	7	5	1	2	15	2	1	2	4	1	0	0	1	0	4	0	7	0	1	1	2	0	11	1	0	0
476714	7.94523	0	0	0	276	0	1	1	0	0	0	8	105	18	4	2	114	1	3	4	4	19	2	6	3	5	1	7	7	2	1	4	0	1	3	0	0	2	0	2	3	0	2	0	0	13	3	8	4
477726	7.9621	0	0	1	291	0	0	1	3	5	0	4	113	9	2	7	106	5	0	5	1	15	1	16	2	3	1	10	6	5	2	0	1	0	2	1	0	5	0	7	0	1	5	1	2	9	1	0	7
478738	7.97897	0	0	0	318	0	0	1	6	1	3	8	117	13	5	7	121	0	0	0	6	20	4	9	0	4	0	5	0	0	0	2	0	2	2	7	0	0	3	8	0	4	2	2	0	7	0	3	0
479750	7.99583	0	0	0	280	2	1	0	2	1	2	16	104	12	4	4	104	3	2	8	2	16	2	7	1	6	3	13	1	4	0	4	3	0	0	4	0	4	4	8	0	3	1	0	1	6	2	1	1
480762	8.0127	0	0	0	347	0	1	3	4	1	4	8	116	18	10	2	108	1	0	3	2	20	1	11	1	4	3	5	15	2	0	1	0	3	0	0	2	2	4	8	2	14	1	0	0	17	2	2	1
481775	8.02958	0	0	3	290	1	0	2	2	0	3	9	114	5	3	8	132	1	2	6	1	15	3	11	3	6	1	7	7	2	0	0	0	0	1	0	0	1	5	4	2	11	7	1	4	11	0	11	2
482787	8.04645	0	0	0	298	0	0	2	2	0	4	3	101	5	4	5	96	1	0	5	3	20	3	6	4	2	2	8	3	2	0	1	0	1	0	0	2	2	0	8	1	5	1	0	0	14	0	4	1
483799	8.06332	0	0	0	281	0	0	0	1	0	3	9	90	13	5	2	99	1	0	6	1	4	0	9	3	7	2	12	0	1	1	1	0	3	0	1	0	0	3	1	5	0	1	6	0	21	4	0	0
484811	8.08018	0	0	0	284	0	1	0	0	0	2	14	109	9	4	0	115	0	0	6	0	10	3	13	5	4	4	12	2	4	0	2	0	2	0	2	0	2	0	7	2	4	0	0	1	12	0	1	1
485823	8.09705	0	0	0	263	0	4	1	3	1	3	6	87	9	1	8	105	1	3	1	0	9	4	8	0	1	6	9	5	8	0	2	0	1	0	0	1	7	5	3	0	2	0	2	0	16	2	4	2
486835	8.11392	0	0	1	274	0	0	1	0	1	2	11	100	13	1	6	93	0	1	2	0	10	1	6	1	0	0	10	3	2	1	3	0	0	0	0	4	3	0	8	0	8	2	0	1	11	0	1	1
487848	8.1308	0	3	0	311	1	0	0	1	0	1	9	103	15	3	2	111	6	0	2	1	8	5	5	3	2	0	4	2	1	0	0	0	1	0	1	3	7	2	7	0	3	1	0	1	9	2	3	0
488860	8.14767	0	0	0	265	0	1	4	0	3	0	7	114	14	0	5	104	1	0	3	3	9	4	9	0	6	0	2	2	3	0	2	0	2	0	2	1	2	0	7	6	4	5	1	1	17	3	2	0
489872	8.16453	0	0	0	307	0	3	4	0	1	2	8	111	16	9	8	107	4	1	5	0	23	6	5	3	6	2	9	4	7	3	2	1	0	0	3	1	4	1	17	3	4	0	2	0	13	1	1	0
490884	8.1814	0	0	3	311	0	0	0	2	0	1	5	108	12	6	19	120	1	0	2	1	10	1	14	3	2	0	14	2	6	0	2	0	0	0	3	4	3	0	4	0	8	2	1	0	29	1	2	2
491896	8.19827	0	0	0	315	0	0	0	3	0	2	8	127	6	6	5	115	2	0	3	3	9	4	12	1	5	0	1	6	6	0	0	2	2	1	2	3	0	0	7	0	7	1	1	1	21	1	5	2
492909	8.21515	0	0	0	281	0	0	0	0	4	2	3	106	17	1	12	120	4	0	1	1	7	2	9	3	0	2	7	4	1	0	1	0	0	1	3	1	3	3	7	0	8	4	1	1	9	0	3	0
493921	8.23202	0	0	0	270	0	0	0	2	0	2	5	96	17	4	4	131	1	0	0	2	13	3	8	5	4	1	4	0	2	5	0	3	0	2	0	0	2	1	8	3	3	3	1	0	15	2	0	0
494933	8.24888	0	1	0	257	0	0	3	0	1	2	9	130	5	5	4	115	5	0	2	1	13	1	11	0	0	3	10	2	0	3	0	0	0	0	0	0	2	0	4	1	7	4	1	0	12	2	2	0
495945	8.26575	0	0	1	285	0	2	0	2	2	4	5	96	8	7	2	109	3	0	7	2	13	6	6	3	1	0	7	1	3	1	0	0	0	0	0	2	3	0	8	5	13	2	0	1	12	0	3	0
496957	8.28262	0	2	1	308	0	0	2	1	1	2	16	120	10	1	8	125	2	4	2	2	10	5	6	0	7	0	4	1	2	5	1	0	7	0	0	0	2	2	14	0	7	1	0	1	8	1	0	2
497969	8.29948	0	0	2	258	0	2	1	5	0	2	6	111	8	5	6	119	4	0	3	4	7	3	4	0	1	2	3	2	3	3	3	0	0	0	2	0	0	0	1	6	2	4	0	0	20	0	0	0
498982	8.31637	0	0	1	283	1	0	0	1	2	8	7	110	11	6	1	115	3	0	5	7	11	6	10	1	0	2	1	8	5	0	2	1	0	3	1	0	3	0	3	4	4	5	1	0	16	2	0	0
499994	8.33323	0	0	0	276	1	2	0	3	2	6	2	128	13	9	3	133	3	0	0	0	9	4	7	0	2	0	6	0	3	1	4	0	3	0	0	0	2	0	3	2	6	7	0	1	11	1	2	0
501006	8.3501	0	0	0	279	0	1	0	1	4	2	18	111	7	1	5	109	6	0	1	2	10	1	9	4	2	0	9	1	1	0	0	0	3	3	1	0	3	1	3	2	6	3	1	0	14	1	2	2
502018	8.36697	0	1	0	276	0	0	0	3	1	3	6	137	13	3	5	125	1	0	0	0	15	2	5	6	2	1	12	1	3	1	0	0	2	0	0	0	2	3	4	1	5	10	0	0	15	3	0	0
503030	8.38383	0	2	0	312	0	0	1	2	3	4	4	114	6	1	8	133	0	0	1	2	19	1	7	0	4	1	5	4	2	0	2	0	0	0	2	2	4	0	5	0	0	2	2	2	13	7	0	1
504043	8.40072	0	1	0	289	1	1	5	1	0	0	12	124	9	1	3	120	1	0	2	2	11	2	5	0	2	1	11	0	0	0	3	1	0	0	4	1	2	5	7	0	2	2	1	1	19	0	2	1
505055	8.41758	0	0	0	279	2	3	4	2	2	0	5	105	6	2	1	91	4	0	3	1	27	4	10	0	6	2	8	3	0	1	2	0	1	0	1	4	1	0	6	2	7	0	9	0	16	2	1	0
506067	8.43445	0	0	0	241	0	3	2	0	1	2	8	113	3	6	4	124	0	0	2	1	6	1	10	2	0	1	10	1	2	0	1	0	1	0	6	0	5	2	2	1	0	3	0	0	8	1	0	1
507079	8.45132	0	0	0	281	0	1	0	1	0	5	4	114	16	0	10	114	5	0	2	0	5	6	11	4	1	1	5	1	2	0	0	0	0	1	0	0	1	0	5	1	1	4	0	3	7	1	1	1
508091	8.46818	0	0	0	313	0	3	0	2	0	0	5	113	9	2	2	131	0	0	1	1	11	1	5	1	3	0	6	4	1	0	1	1	2	0	0	0	2	0	5	3	1	5	1	0	12	1	4	0
509103	8.48505	0	0	0	256	0	1	1	5	10	2	4	90	8	3	3	142	3	0	0	1	19	5	7	3	1	1	4	2	3	0	0	0	5	4	0	0	1	0	3	0	3	1	4	0	11	0	4	0
510116	8.50193	0	0	0	276	0	3	4	0	0	2	6	114	9	4	9	126	1	1	4	0	9	4	8	3	2	0	2	0	1	0	0	0	2	0	1	5	0	2	11	0	2	4	2	0	16	1	0	0
511128	8.5188	0	0	0	290	0	2	6	1	0	7	7	109	13	2	8	101	1	1	0	3	16	6	17	0	1	1	18	2	0	0	5	0	1	0	0	1	3	0	2	0	4	0	0	0	13	1	0	5
512140	8.53567	0	0	0	262	0	1	0	1	0	0	12	95	15	4	3	139	0	0	3	0	12	9	11	1	2	0	13	2	5	0	2	0	1	4	2	4	2	0	9	1	4	3	6	0	14	1	1	2
513152	8.55253	0	0	0	249	0	0	0	0	1	1	11	115	13	2	8	144	1	0	3	2	7	4	3	0	1	4	8	1	4	1	1	0	0	0	2	5	3	0	10	3	7	1	0	0	19	4	2	5
514164	8.5694	0	0	0	303	0	3	0	3	0	1	10	106	10	10	8	121	4	0	3	1	12	4	0	0	5	1	10	2	4	4	2	1	2	0	1	2	2	1	4	0	6	1	2	0	15	2	0	3
515177	8.58628	0	1	1	320	0	0	4	1	0	1	3	111	14	0	4	131	3	0	2	2	14	0	9	5	1	1	9	0	1	0	1	0	3	4	0	4	10	2	6	4	4	1	0	0	13	2	2	1
516189	8.60315	0	0	0	327	0	0	0	3	2	4	8	109	21	3	6	126	0	1	0	3	16	1	8	2	3	4	18	6	3	1	1	1	0	0	6	0	2	0	7	1	5	5	1	0	13	2	3	3
517201	8.62002	0	0	0	284	0	3	2	1	1	2	13	121	7	3	6	123	0	0	9	0	21	2	3	0	0	5	8	4	7	0	1	0	0	0	1	1	2	3	7	0	7	2	2	1	14	1	0	1
518213	8.63688	0	0	0	275	0	0	4	1	3	7	6	121	9	3	11	113	1	0	7	0	10	3	4	2	1	2	10	1	4	0	7	0	0	0	0	1	7	2	6	0	7	3	1	0	8	0	0	0
519225	8.65375	0	0	0	299	1	0	0	0	0	0	9	138	6	5	12	117	0	0	6	0	17	9	9	3	1	2	5	3	5	0	6	0	0	1	5	2	12	6	8	4	9	0	3	1	13	0	3	6
520237	8.67062	0	0	0	264	1	3	0	0	0	1	6	83	14	1	4	133	7	0	4	0	16	3	9	2	0	5	7	3	2	1	1	0	0	3	2	8	7	0	9	0	5	0	2	0	16	1	0	3
521250	8.6875	0	0	0	275	0	1	1	5	1	3	12	116	9	4	10	119	1	0	2	2	12	14	7	4	10	1	1	15	3	0	1	0	0	0	3	0	3	0	5	2	7	1	2	0	18	7	5	1
522262	8.70437	0	0	0	267	0	0	4	0	0	1	11	90	13	7	5	137	4	1	1	2	11	3	6	4	3	1	0	2	0	0	0	0	2	0	0	0	1	4	12	4	7	3	1	0	13	1	0	0
523274	8.72123	0	1	0	304	1	1	0	3	0	0	9	140	11	2	5	144	5	1	2	0	9	0	7	2	2	2	19	8	3	2	0	2	2	0	5	5	1	3	7	1	2	1	1	0	7	1	1	1
524286	8.7381	0	0	0	284	0	3	1	4	0	1	7	113	9	3	9	113	2	1	4	0	8	4	5	0	4	1	8	8	0	1	0	0	1	0	2	1	0	2	0	1	1	0	4	0	17	0	1	1
525298	8.75497	0	0	0	276	0	0	0	2	0	1	15	122	20	5	4	144	5	1	3	2	11	7	6	8	1	2	15	1	5	0	4	1	3	5	2	0	2	1	9	1	5	2	1	0	18	0	3	0
526311	8.77185	0	0	0	294	0	0	0	1	0	1	5	110	17	2	5	109	2	1	3	2	8	0	5	4	2	0	10	6	2	1	1	1	0	0	0	1	7	0	5	0	7	3	4	0	22	6	2	0
527323	8.78872	0	0	0	279	0	0	4	2	1	3	9	123	9	10	8	135	0	2	3	1	13	3	11	3	7	3	2	0	3	0	1	0	1	0	3	1	4	0	12	1	4	1	2	1	13	4	5	0
528335	8.80558	0	0	1	294	0	1	0	0	0	1	5	104	9	8	4	96	2	0	0	0	5	2	16	1	2	4	1	5	3	0	0	0	0	1	3	1	2	1	5	2	0	4	1	0	11	0	2	1
529347	8.82245	0	0	0	319	0	0	2	1	2	0	3	106	11	4	2	144	2	0	0	2	13	0	3	0	0	1	5	1	2	0	0	0	0	0	0	2	1	0	8	0	8	0	0	0	10	0	5	4
530359	8.83932	0	0	0	332	2	0	2	4	1	3	7	116	16	2	7	115	2	1	0	2	10	3	7	2	0	4	4	6	1	1	0	0	1	0	5	0	1	0	4	3	6	1	7	2	13	2	3	0
531371	8.85618	0	0	0	269	0	0	1	0	0	2	9	117	15	0	9	129	1	2	1	0	17	2	8	2	3	1	5	1	4	1	2	1	1	1	4	0	5	0	12	2	6	4	0	1	15	0	1	1
532384	8.87307	0	0	1	293	0	4	0	0	1	3	17	116	5	4	8	142	4	0	1	1	10	1	10	1	4	3	12	4	2	0	0	1	0	0	4	2	0	4	5	1	2	7	0	4	18	7	5	2
533396	8.88993	0	1	1	325	4	0	0	0	4	0	12	101	12	3	7	123	2	1	4	3	10	2	7	2	1	2	4	3	2	0	4	0	2	3	3	3	11	4	4	5	3	3	4	0	23	0	1	0
534408	8.9068	0	0	0	278	2	1	1	1	0	0	5	89	17	6	4	133	0	0	1	0	7	8	4	4	1	1	8	3	1	1	0	1	2	0	1	1	1	0	1	2	6	2	3	0	13	0	2	4
535420	8.92367	0	1	2	273	0	2	0	1	1	4	11	114	10	6	7	129	1	0	2	2	16	3	3	3	2	4	13	0	4	0	0	3	0	0	4	5	2	0	3	3	4	1	1	0	22	1	4	0
536432	8.94053	0	0	0	319	1	0	4	1	2	2	6	95	9	6	3	152	3	1	3	0	13	6	4	4	0	2	5	6	7	2	3	0	0	1	0	0	2	5	7	1	7	1	0	0	17	6	3	0
537445	8.95742	0	0	0	284	0	1	0	0	0	3	8	115	22	2	0	120	7	0	2	0	12	4	8	7	0	3	10	7	4	0	3	0	0	0	0	3	1	1	4	1	6	2	2	0	19	1	2	1
538457	8.97428	0	0	0	292	0	0	1	0	0	4	1	110	15	10	4	122	2	0	0	0	17	2	7	0	5	0	4	1	5	0	2	2	0	0	1	2	0	0	7	0	3	8	2	0	20	3	4	1
539469	8.99115	0	0	0	295	0	2	0	1	1	1	17	126	7	5	1	132	4	0	7	1	15	1	12	0	8	3	7	2	2	1	2	1	0	0	2	1	3	0	7	1	5	2	0	0	24	7	3	0
540481	9.00802	0	1	0	278	0	0	0	0	0	2	15	121	14	0	3	126	0	0	3	1	5	2	6	3	0	0	4	4	5	4	0	0	0	0	4	1	1	0	7	0	0	1	0	1	15	0	1	1
541493	9.02488	0	0	0	266	0	3	2	1	1	0	9	94	13	4	8	167	13	1	1	0	7	7	8	4	5	2	12	4	1	4	6	0	0	0	0	1	1	0	6	0	3	3	1	1	11	7	7	3
542505	9.04175	0	0	0	251	2	0	6	0	2	0	4	100	14	8	5	135	1	1	4	0	8	4	3	1	3	1	9	1	2	0	0	0	0	0	0	1	0	3	2	1	1	1	5	0	16	1	6	0
543518	9.05863	0	2	0	287	0	0	1	2	0	2	1	139	3	11	11	141	1	0	0	6	18	0	6	8	3	0	6	3	0	0	2	0	0	0	1	0	4	0	0	1	6	0	1	0	13	5	3	0
544530	9.0755	0	0	0	265	0	0	1	1	2	2	11	121	9	2	4	126	4	0	5	0	9	2	12	0	4	2	12	3	7	0	2	0	1	2	1	1	1	0	9	2	5	3	0	0	23	3	7	5
545542	9.09237	0	0	3	291	2	0	2	1	1	0	10	123	15	14	11	137	2	0	0	3	13	0	2	2	4	1	8	2	6	0	1	1	1	0	4	0	0	0	5	8	3	0	2	0	11	3	2	1
546554	9.10923	0	0	0	289	0	2	0	4	2	4	7	94	18	2	0	136	3	2	1	1	12	2	6	0	3	0	11	4	1	0	3	0	0	2	1	1	1	0	0	0	7	1	1	0	12	3	1	1
547566	9.1261	0	0	0	269	0	5	0	2	0	3	0	115	11	1	9	121	2	3	5	1	9	1	6	5	0	0	0	2	8	0	1	1	1	0	0	1	6	1	9	8	2	7	1	0	15	1	6	4
548579	9.14298	0	1	0	260	0	1	1	1	2	1	10	116	10	2	2	124	3	0	1	1	10	3	3	5	3	1	14	4	3	0	1	1	2	1	2	2	6	0	6	3	3	0	5	0	16	4	5	0
549591	9.15985	0	0	0	278	1	1	2	0	0	4	20	116	8	3	7	133	4	0	1	1	14	1	7	1	0	0	6	3	5	1	1	0	0	2	0	2	1	0	9	0	2	3	3	0	3	0	7	0
550603	9.17672	0	1	0	275	0	6	1	0	0	2	9	105	6	2	5	125	2	1	1	3	8	5	3	4	2	3	3	0	6	1	2	0	3	3	1	5	3	0	6	1	2	1	0	0	18	3	5	0
551615	9.19358	0	0	0	307	0	2	0	2	1	1	10	102	14	4	9	146	4	0	3	1	7	8	10	0	2	2	8	3	7	2	0	0	1	0	0	1	1	4	5	7	2	3	0	0	13	1	5	7
552627	9.21045	0	0	3	288	0	4	0	3	0	2	6	95	14	2	7	155	2	0	1	1	16	3	9	4	1	2	15	1	6	0	4	0	0	1	1	0	2	4	5	2	3	0	3	1	14	7	10	2
553639	9.22732	0	1	0	264	0	2	0	1	0	3	11	141	5	3	5	113	6	0	0	0	16	0	8	0	1	1	16	4	6	1	2	0	0	1	4	0	10	3	3	0	6	0	1	0	21	2	2	0
554652	9.2442	0	0	0	284	0	0	0	2	0	3	14	95	14	1	3	131	5	0	3	2	9	2	9	2	6	0	13	0	4	2	0	3	0	0	1	0	5	1	13	0	6	0	2	0	20	4	1	0
555664	9.26107	0	0	0	329	5	0	1	0	2	2	5	105	7	5	3	125	0	1	4	1	7	2	9	5	0	2	10	4	5	3	1	0	1	1	1	1	5	0	9	0	7	0	8	0	17	0	3	1
556676	9.27793	0	0	3	270	0	2	0	4	3	6	11	97	13	5	3	122	2	1	0	1	10	0	7	0	10	3	7	3	4	0	1	1	0	2	0	2	3	3	2	3	2	2	2	0	19	2	4	3
557688	9.2948	0	0	0	298	0	0	2	5	2	1	14	98	10	4	2	131	8	1	2	1	10	1	4	4	1	0	17	3	4	4	1	1	0	0	0	5	0	11	3	5	1	1	2	4	22	3	1	0
558700	9.31167	0	2	0	251	0	0	0	6	0	3	11	102	15	5	10	171	3	0	1	2	10	1	10	0	1	2	11	2	8	3	1	0	2	2	5	1	5	1	8	1	3	2	1	1	26	3	1	2
559713	9.32855	0	0	0	265	1	2	0	0	0	0	16	108	5	1	3	124	7	0	3	3	5	1	18	1	1	4	9	2	5	0	0	0	0	3	1	0	5	0	9	1	5	1	4	0	20	4	4	1
560725	9.34542	0	0	3	263	0	2	0	2	1	5	6	93	21	2	4	135	0	0	2	3	17	1	7	2	4	1	1	2	1	0	5	0	3	0	3	0	3	6	5	2	2	2	4	0	17	2	4	2
561737	9.36228	0	0	0	267	0	0	0	0	0	2	8	111	10	2	4	168	4	0	5	2	12	3	3	1	3	4	8	1	2	0	2	3	1	1	2	0	0	2	4	3	4	0	2	0	11	0	8	0
562749	9.37915	0	0	1	293	0	2	0	2	0	3	8	121	15	3	14	133	2	0	6	2	25	6	2	2	2	0	3	2	8	0	3	0	1	0	0	0	0	0	8	4	8	1	3	2	20	1	1	1
563761	9.39602	0	0	7	247	0	1	1	0	0	4	7	104	12	10	11	151	5	0	2	0	13	7	7	4	1	1	10	4	2	0	1	0	0	1	1	0	7	0	12	0	5	4	3	0	14	1	0	0
564773	9.41288	0	0	4	284	0	3	0	2	2	2	15	110	8	6	13	149	5	1	4	0	10	1	6	3	6	0	9	1	6	1	4	0	4	0	0	3	2	0	4	0	3	0	0	0	10	0	5	0
565786	9.42977	0	0	1	257	6	0	1	0	0	4	14	87	10	1	6	107	0	0	4	1	10	1	5	0	0	3	6	4	1	2	0	0	2	0	3	2	2	1	8	0	5	3	2	1	18	0	5	0
566798	9.44663	0	0	0	287	0	2	2	0	0	1	6	103	9	4	4	108	6	1	3	2	5	3	7	1	5	2	8	3	1	1	3	0	2	0	0	2	3	2	2	3	2	3	1	0	14	7	3	1
567810	9.4635	0	1	0	285	0	1	2	3	2	1	9	122	4	4	6	126	2	1	5	0	13	1	4	3	4	0	14	2	0	0	2	0	2	2	2	0	4	1	7	4	3	1	3	0	16	1	7	1
568822	9.48037	0	0	0	315	0	2	0	0	4	1	4	121	11	3	7	157	2	0	0	2	9	0	4	3	2	1	6	2	12	0	2	1	2	0	0	0	5	0	7	0	6	0	5	0	30	3	1	5
569834	9.49723	0	0	0	251	0	0	0	1	1	2	3	86	14	8	9	117	7	0	4	1	10	3	9	1	0	2	3	6	4	0	0	0	3	0	1	0	0	1	9	3	4	3	3	0	14	2	1	1
570847	9.51412	0	2	1	287	0	0	3	1	1	0	16	113	13	4	7	119	3	2	0	4	8	4	10	12	0	3	9	7	16	0	0	0	0	0	4	2	1	3	14	0	4	2	3	0	17	2	2	1
571859	9.53098	0	0	0	288	0	2	2	0	1	4	11	118	19	5	4	122	4	3	2	0	11	3	3	1	2	1	6	2	3	0	5	1	0	0	0	1	2	5	3	3	14	0	0	0	23	4	3	0
572871	9.54785	0	0	0	235	0	3	0	3	0	1	5	96	10	7	8	132	3	5	2	1	16	4	4	3	6	2	8	1	4	0	5	0	1	1	0	0	0	0	7	3	2	6	0	0	27	6	2	0
573883	9.56472	0	0	1	296	0	3	2	4	1	1	8	116	10	2	12	141	9	0	0	0	14	2	6	1	2	0	6	2	5	4	2	0	0	0	2	0	4	1	7	5	4	1	4	0	12	5	2	2
574895	9.58158	0	0	0	280	0	3	0	1	1	3	12	140	16	5	7	134	4	3	3	3	7	3	7	1	6	3	8	4	4	1	2	1	5	1	4	0	1	0	3	0	7	2	1	1	20	4	1	10
575907	9.59845	0	0	0	248	2	2	0	0	0	4	9	117	9	6	7	118	5	0	1	1	5	4	5	2	3	2	6	4	3	1	1	0	0	0	3	0	3	0	7	1	2	3	1	0	5	1	2	1
576920	9.61533	0	0	0	288	0	0	1	2	0	0	10	109	17	3	5	141	0	0	0	0	14	3	3	1	0	5	6	4	4	1	6	0	1	0	2	2	3	2	12	4	1	3	3	0	24	1	3	0
577932	9.6322	0	0	2	266	0	0	1	1	0	3	17	118	9	2	3	143	2	0	1	2	19	0	13	0	0	4	7	2	5	3	0	0	2	0	1	2	3	2	11	1	5	0	1	0	23	2	2	5
578944	9.64907	0	1	0	269	0	0	1	2	0	0	8	106	17	2	8	142	0	0	2	4	10	0	13	0	6	0	14	7	5	8	9	5	0	0	0	5	1	1	10	1	10	1	1	0	22	2	1	5
579956	9.66593	0	0	2	281	1	0	5	4	1	3	4	121	11	7	12	134	4	1	2	1	10	1	6	2	7	3	7	1	3	0	2	0	1	0	2	1	5	2	5	1	3	1	1	0	12	0	2	2
580968	9.6828	0	2	0	291	1	0	2	1	2	2	8	111	17	1	5	127	2	1	0	1	14	5	7	0	2	0	14	3	4	0	3	2	0	1	1	2	1	0	13	1	14	0	3	0	31	0	1	4
581981	9.69968	0	1	1	302	1	0	0	0	1	2	10	97	10	4	9	156	1	0	5	3	8	4	6	5	4	2	2	1	3	2	0	1	3	0	0	0	2	0	3	2	5	4	11	4	23	1	3	0
582993	9.71655	0	0	1	299	0	0	0	0	2	2	11	117	16	2	4	133	0	4	9	1	11	6	5	1	2	2	7	0	6	2	2	0	0	1	1	2	2	5	7	5	7	1	2	2	18	1	5	5
584005	9.73342	0	0	0	273	0	0	3	1	1	0	8	91	15	0	6	127	4	1	5	4	10	3	6	2	2	2	14	3	7	0	0	0	0	0	0	0	0	0	8	0	8	3	4	0	18	4	1	0
585017	9.75028	0	0	0	272	0	0	0	0	2	0	6	117	18	2	4	149	1	0	2	0	6	4	8	4	2	1	0	6	6	1	1	2	1	0	0	0	2	3	6	5	3	2	2	0	18	2	8	1
586029	9.76715	0	0	0	262	0	3	1	1	2	2	14	114	9	7	2	125	3	1	0	0	13	5	4	3	3	0	10	3	6	0	0	0	1	0	2	1	2	2	8	2	7	2	4	0	29	3	0	0
587041	9.78402	0	0	3	281	0	2	0	0	3	1	5	129	14	1	4	149	3	2	1	3	10	3	7	4	4	3	14	7	6	0	5	0	0	0	2	1	5	2	14	3	6	0	4	1	22	3	0	1
588054	9.8009	0	1	3	262	2	1	0	0	0	4	9	130	6	7	9	135	2	0	4	0	10	2	9	0	0	5	6	0	5	0	0	1	0	1	2	3	5	0	4	0	9	1	1	0	26	2	2	0
589066	9.81777	0	0	1	267	0	0	1	0	1	1	4	113	13	0	9	154	1	1	1	0	9	5	2	3	5	0	5	4	6	0	5	0	1	0	1	1	2	1	11	0	13	0	5	0	19	3	1	3
590078	9.83463	0	0	0	284	1	0	0	0	2	8	7	120	10	1	15	161	3	2	1	1	4	2	7	1	3	0	9	5	4	0	1	0	0	0	0	1	2	0	8	3	5	2	7	0	25	1	1	0
591090	9.8515	0	1	0	258	0	4	0	3	0	2	8	103	6	4	14	155	9	4	7	0	11	2	13	0	5	6	10	2	6	0	0	0	0	0	1	1	4	1	9	1	2	0	6	0	28	9	1	0
592102	9.86837	0	0	0	249	1	2	4	1	1	1	6	84	7	9	7	120	0	2	4	0	15	2	1	3	0	0	11	4	6	2	0	0	0	0	1	1	2	0	6	0	12	0	7	0	25	0	1	5
593115	9.88525	0	0	0	270	0	0	0	1	4	2	14	93	12	5	7	142	2	1	0	1	14	4	4	0	0	0	12	6	6	1	1	0	0	1	2	2	0	2	2	3	9	3	1	1	27	2	2	2
594127	9.90212	0	0	1	257	0	1	1	1	0	2	6	115	17	4	11	113	4	2	2	2	7	4	7	2	3	0	15	5	11	1	1	0	0	1	3	0	3	0	5	2	7	0	0	3	12	3	2	3
595139	9.91898	0	0	2	268	0	0	1	0	1	0	11	95	16	3	5	145	3	0	6	1	2	0	4	1	5	1	15	2	5	0	0	0	0	1	2	1	3	2	11	5	5	8	5	1	22	1	8	0
596151	9.93585	0	0	1	272	0	1	2	3	0	1	16	81	10	3	16	153	0	0	1	0	14	2	12	0	4	4	16	4	2	1	0	0	1	0	0	1	1	1	7	1	5	4	14	0	28	11	2	3
597163	9.95272	0	0	2	309	0	0	0	1	0	3	5	98	8	5	15	132	1	2	0	0	9	7	4	8	4	0	17	5	4	0	2	0	2	1	1	1	0	0	7	5	8	4	7	0	15	1	9	0
598175	9.96958	0	2	0	279	0	2	1	0	0	0	6	130	9	5	22	114	1	0	6	3	4	0	2	1	4	3	18	5	5	0	0	0	1	0	2	2	0	0	8	9	4	6	6	0	14	1	0	1
599188	9.98647	0	0	0	284	0	2	0	1	1	9	10	98	14	4	1	155	7	0	1	2	6	3	6	1	6	0	9	0	7	0	5	0	0	0	0	0	0	1	9	2	10	2	5	0	12	2	0	0
600200	10.0033	0	0	0	246	0	0	0	0	0	0	7	104	10	3	5	150	4	0	2	7	16	1	5	3	4	1	11	5	9	0	1	0	1	2	3	3	1	0	16	7	5	6	7	2	18	2	0	0
601212	10.0202	0	0	0	311	0	3	0	2	0	1	10	109	10	2	4	127	6	1	4	2	3	0	4	3	5	4	6	3	7	5	0	0	0	2	2	5	4	4	7	2	6	8	4	0	28	1	1	0
602224	10.0371	0	0	0	298	2	0	1	0	1	2	20	114	10	2	11	156	1	1	0	0	6	4	2	2	6	4	13	2	4	2	4	0	1	1	2	1	5	0	12	6	9	2	2	1	30	0	4	0
603236	10.0539	0	2	0	280	0	1	0	1	1	1	7	115	18	5	13	147	6	1	1	2	3	4	7	0	10	3	14	5	17	0	3	0	0	2	1	0	3	0	10	5	23	4	2	1	30	1	4	2
604249	10.0708	0	0	0	255	0	1	1	0	0	0	8	105	10	4	16	148	5	1	2	3	4	0	6	1	2	0	6	4	9	0	2	1	1	1	3	0	2	1	13	2	5	10	4	2	21	4	7	0
605261	10.0877	0	0	1	232	0	0	1	0	0	4	15	105	17	7	12	154	2	1	3	0	8	3	3	1	3	5	13	2	18	2	2	0	1	0	6	0	1	4	7	5	2	6	3	0	30	2	0	2
606273	10.1045	0	0	0	291	1	0	1	0	2	2	5	99	32	4	14	157	3	0	10	2	10	2	8	4	1	0	12	4	10	1	1	0	1	0	0	1	3	1	11	0	6	7	8	2	21	3	7	4
607285	10.1214	0	0	0	261	0	0	0	1	1	1	8	110	16	8	12	140	3	0	1	0	10	5	3	2	7	2	14	3	3	1	0	0	0	0	0	1	5	1	8	6	3	4	6	1	20	1	10	5
608297	10.1383	0	0	0	258	1	0	0	0	4	2	12	117	10	6	10	127	4	1	1	1	10	1	7	2	1	2	17	4	4	0	5	0	0	0	1	4	2	2	15	1	13	0	7	0	18	4	7	1
609309	10.1552	0	1	0	258	0	0	2	0	0	5	6	109	12	13	10	153	3	1	2	2	13	0	9	3	4	0	16	5	13	0	2	0	4	0	2	0	3	1	20	1	25	8	5	5	22	0	2	0
610322	10.172	0	0	0	271	0	2	0	2	1	0	10	90	11	4	13	175	6	1	3	0	8	1	6	0	4	0	29	3	12	1	2	1	2	2	1	3	12	2	7	4	23	4	13	3	30	7	3	1
611334	10.1889	0	0	3	285	0	2	2	2	0	1	7	115	21	2	14	162	5	1	1	0	5	2	6	2	5	1	25	8	21	7	0	0	1	0	4	2	0	1	15	1	22	6	7	0	27	3	5	0
612346	10.2058	0	0	3	298	0	3	1	3	2	0	12	120	18	5	21	150	2	0	0	3	3	4	4	6	0	2	24	6	11	0	3	0	2	0	2	3	2	4	6	0	22	1	6	3	24	9	4	0
613358	10.2226	0	0	2	271	1	4	0	2	1	0	15	128	23	3	11	151	1	0	0	2	5	4	9	4	1	3	14	2	18	1	2	1	1	3	0	3	1	1	14	0	15	9	10	2	23	6	4	0
614370	10.2395	0	0	0	268	0	0	0	2	1	3	11	123	24	4	14	139	0	1	1	1	10	1	5	3	2	4	9	5	12	2	2	0	2	0	3	6	3	0	13	5	18	1	12	0	20	4	0	0
615383	10.2564	0	0	0	266	0	0	0	0	0	1	9	94	20	4	21	159	0	1	0	7	9	5	10	2	10	5	21	8	17	1	7	0	1	0	0	0	11	1	13	4	12	6	15	0	24	1	4	3
616395	10.2733	0	0	1	286	0	0	0	1	0	0	12	115	32	4	22	164	1	0	7	2	8	0	5	2	5	1	21	12	15	3	0	0	0	0	1	2	1	0	19	5	17	2	13	0	18	6	11	0
617407	10.2901	0	0	0	261	0	1	0	3	0	0	11	100	27	2	15	163	4	1	0	0	4	0	2	4	8	3	24	6	18	0	1	0	1	6	5	0	0	0	19	6	23	3	6	3	30	1	2	4
618419	10.307	0	0	2	253	0	1	0	0	1	0	16	96	23	3	21	155	3	0	3	2	4	4	15	4	2	5	19	3	11	1	3	0	1	0	6	4	1	3	12	1	19	1	6	1	21	0	4	3
619431	10.3239	0	0	0	256	0	0	0	3	0	1	4	113	22	1	10	153	3	0	1	0	12	2	8	4	4	2	19	4	12	1	1	0	1	0	1	5	8	1	12	7	12	7	14	3	21	6	1	3
620443	10.3407	0	0	0	274	0	0	0	1	0	0	4	114	16	3	12	172	3	1	4	6	3	0	2	1	3	5	10	5	9	0	8	0	0	0	0	2	7	0	16	7	25	9	8	3	21	4	2	0
621456	10.3576	0	0	0	251	0	2	1	1	3	0	10	109	16	9	22	148	4	0	2	0	9	3	7	5	4	5	20	7	16	1	2	0	2	0	0	0	4	0	9	7	19	4	17	1	17	5	4	0
622468	10.3745	0	0	0	295	0	1	1	2	2	5	6	131	15	1	18	159	3	0	2	1	8	1	7	2	0	0	19	7	19	0	1	0	0	2	4	0	4	2	9	5	13	4	10	0	25	6	7	0
623480	10.3913	0	0	0	302	0	1	0	0	2	1	11	105	18	0	20	155	5	3	4	0	9	2	6	2	1	5	21	11	19	0	0	0	1	2	4	6	3	2	18	4	17	6	8	0	31	2	4	0
624492	10.4082	0	1	0	254	0	0	0	1	1	2	8	110	22	6	20	193	6	1	5	1	8	0	9	0	1	1	22	8	16	0	6	0	0	3	4	0	2	0	28	4	30	4	15	1	27	6	3	2
625504	10.4251	0	0	0	263	1	0	1	5	0	0	6	100	27	5	18	159	4	0	1	0	10	6	4	1	1	5	20	11	25	4	7	1	0	2	0	2	3	1	13	8	19	13	12	0	38	4	7	1
626517	10.442	0	0	0	288	0	2	4	6	1	0	10	94	17	9	10	156	1	0	5	2	9	0	8	1	5	3	24	0	23	1	4	0	0	0	4	0	7	0	14	1	11	8	16	0	31	6	2	3
627529	10.4588	0	0	0	257	0	0	0	2	0	0	7	88	22	6	22	180	5	3	1	1	13	8	5	2	13	3	27	11	20	1	7	0	2	2	0	3	4	0	22	5	24	13	14	3	24	1	6	2
628541	10.4757	0	2	0	256	0	1	1	1	0	1	13	117	26	6	17	164	1	1	7	0	10	4	8	2	2	2	26	8	14	3	3	0	1	0	2	3	2	3	15	2	24	8	13	0	20	3	6	5
629553	10.4925	0	1	1	250	0	0	1	0	0	1	3	146	23	13	20	163	2	2	2	0	2	0	3	3	1	0	20	5	25	1	2	0	0	0	3	2	4	1	7	4	23	8	16	0	23	0	10	0
630565	10.5094	0	0	1	255	0	2	0	2	0	2	6	112	23	3	18	171	6	0	1	0	12	7	6	3	7	5	22	11	21	0	1	0	1	0	4	1	4	1	16	3	12	6	17	0	20	4	1	0
631577	10.5263	0	0	0	242	0	4	0	2	1	0	8	119	26	4	15	146	3	0	6	3	13	1	8	3	8	4	30	12	29	3	2	0	2	0	0	0	11	0	28	7	20	17	26	2	26	6	1	0
632590	10.5432	0	0	0	275	0	2	0	1	0	1	5	121	19	3	17	177	7	0	1	3	4	0	2	2	7	0	25	25	19	2	4	1	3	0	4	0	2	1	10	4	23	2	10	0	24	2	2	0
633602	10.56	0	0	1	281	0	0	0	4	0	1	12	102	23	5	19	150	5	1	0	1	8	0	10	1	5	2	44	6	26	2	0	0	0	0	6	1	9	2	19	9	13	8	11	1	28	2	11	0
634614	10.5769	0	0	2	288	0	0	2	4	3	1	7	101	17	3	28	150	2	0	0	0	9	3	9	3	2	1	43	6	20	0	6	0	0	0	5	1	9	2	24	2	24	13	19	0	31	3	7	0
635626	10.5938	0	4	3	277	1	2	0	2	2	1	7	120	18	4	9	126	3	1	0	0	16	0	6	0	4	3	29	3	24	1	1	0	1	1	0	2	3	1	16	5	26	6	19	2	29	4	8	1
636638	10.6106	0	0	0	254	0	0	0	0	0	3	12	107	17	2	22	171	2	3	1	0	9	4	6	0	12	1	24	11	28	1	2	0	1	2	0	4	4	0	25	5	23	8	26	0	26	0	7	0
637651	10.6275	0	0	0	255	0	1	0	1	0	3	14	109	18	3	19	128	8	0	2	1	3	0	2	3	10	0	35	14	33	2	7	0	0	0	0	0	11	2	17	9	28	5	21	0	18	6	2	1
638663	10.6444	0	0	1	245	1	3	1	2	0	2	2	118	27	7	22	158	6	0	2	2	13	1	5	1	6	5	44	6	28	1	3	0	0	0	1	6	1	0	21	5	22	14	28	0	16	3	0	1
639675	10.6613	0	0	5	227	0	4	1	1	0	2	11	118	23	9	20	129	12	0	0	0	11	0	2	3	6	4	55	18	25	0	0	1	0	1	0	0	1	2	22	5	29	9	20	0	24	3	8	1
640687	10.6781	0	1	0	295	0	0	4	0	2	5	15	101	31	6	28	139	6	0	3	1	3	0	6	1	2	14	47	16	28	3	1	0	3	0	3	1	7	4	23	10	31	15	20	1	20	1	7	13
641699	10.695	0	0	1	251	0	0	1	2	0	0	7	112	21	4	28	156	9	0	0	1	6	4	13	0	10	2	33	13	26	2	0	0	2	1	2	2	8	3	27	1	37	7	20	2	27	2	10	0
642711	10.7119	0	0	0	315	0	1	0	0	2	10	13	111	22	10	19	155	3	0	2	0	5	1	4	2	4	8	17	6	31	0	2	1	1	0	1	5	9	2	30	5	36	11	16	6	26	6	6	1
643724	10.7287	0	0	0	227	0	0	0	1	1	2	11	105	27	12	31	171	4	0	1	2	0	1	6	4	10	0	40	12	30	3	3	0	2	0	0	11	4	3	36	7	25	8	19	5	40	2	10	0
644736	10.7456	0	1	0	309	0	3	0	2	0	1	8	118	26	9	42	139	3	0	0	4	12	3	11	0	4	0	39	5	21	1	0	2	3	3	2	1	7	1	13	15	21	4	26	2	33	5	2	0
645748	10.7625	0	0	3	270	0	2	1	0	0	0	9	91	26	11	55	182	2	0	4	0	10	4	7	1	7	4	73	12	41	2	10	3	0	2	2	3	3	5	23	6	19	8	24	1	18	5	3	0
646760	10.7793	0	0	1	248	0	3	0	3	0	0	4	103	36	11	43	170	4	0	1	2	7	1	4	1	9	1	46	14	54	3	2	0	1	0	6	0	6	1	14	12	33	6	17	0	25	1	12	1
647772	10.7962	0	1	0	252	0	1	0	0	3	1	7	100	39	6	32	167	7	0	1	3	5	0	9	0	21	5	40	11	74	2	2	0	1	0	1	1	9	5	34	4	36	7	24	1	19	1	4	0
648785	10.8131	0	0	0	270	0	0	1	0	0	4	15	122	34	8	31	157	5	2	1	2	5	1	5	3	15	0	50	8	50	2	3	0	2	3	0	0	6	0	22	16	44	8	26	2	20	4	11	1
649797	10.83	0	0	2	266	0	1	1	3	0	5	12	103	21	14	17	191	4	1	2	2	6	3	8	4	17	3	53	16	64	8	2	4	0	0	1	0	3	2	16	13	21	20	18	0	17	5	8	1
650809	10.8468	0	0	3	277	1	2	3	1	0	2	7	111	46	12	25	132	6	0	4	0	6	0	3	1	11	3	79	12	76	1	9	0	4	7	0	4	3	1	31	12	42	15	27	1	43	2	4	1
651821	10.8637	0	0	0	283	0	0	0	0	0	11	11	95	72	8	23	184	16	0	0	3	7	0	1	3	5	1	58	17	68	2	0	0	3	0	0	3	3	1	22	5	39	17	19	0	48	0	6	4
652833	10.8805	0	0	1	250	0	0	2	1	0	6	15	88	49	9	27	159	5	0	3	0	5	4	7	1	4	4	58	12	71	2	1	0	1	0	0	0	7	3	39	3	41	20	24	2	35	3	4	0
653845	10.8974	0	0	0	280	1	1	1	1	1	5	24	118	53	7	33	163	7	0	5	1	9	3	10	1	3	1	65	24	56	0	3	0	3	1	2	1	1	1	24	12	67	10	31	5	24	2	5	2
654858	10.9143	0	0	0	293	0	0	0	2	0	3	7	92	42	2	33	178	8	0	5	0	9	1	7	6	7	3	60	18	75	1	8	0	3	0	2	1	3	8	24	10	63	20	38	7	21	3	5	0
655870	10.9312	0	0	0	243	0	0	0	1	0	4	13	103	51	15	46	194	4	0	7	1	5	2	8	1	9	0	61	18	66	3	5	0	0	1	5	0	11	1	44	7	89	11	36	0	48	8	7	1
656882	10.948	0	0	3	266	1	1	1	2	0	1	5	114	50	8	63	145	6	2	5	0	6	2	3	2	0	6	61	14	66	5	1	0	3	0	0	3	6	1	30	18	56	16	54	0	32	3	6	2
657894	10.9649	0	0	0	271	2	0	0	0	0	6	12	117	52	16	59	150	10	0	2	3	10	3	8	2	7	1	62	10	59	5	2	0	0	4	0	1	4	9	42	8	40	9	47	2	24	10	8	1
658906	10.9818	0	0	1	242	0	4	2	6	0	5	15	95	31	8	43	181	17	0	1	1	10	5	10	3	10	5	67	17	82	4	0	0	0	0	0	5	5	3	43	8	50	9	58	2	17	3	15	0
659919	10.9986	0	0	0	276	1	2	1	2	2	0	10	107	46	11	18	161	9	0	4	1	10	1	18	0	6	4	66	4	60	0	9	0	1	0	2	3	8	2	32	10	76	19	37	0	35	3	11	5
660931	11.0155	0	0	0	282	0	1	0	1	2	3	9	125	51	10	64	150	12	0	1	1	15	4	11	1	8	2	93	16	60	5	3	0	3	0	2	1	9	2	30	9	54	16	30	6	16	2	2	4
661943	11.0324	0	2	2	253	1	0	0	1	1	1	9	118	46	13	61	164	5	0	7	0	7	1	5	0	7	2	75	14	61	3	8	0	7	5	2	2	1	3	40	10	67	23	22	3	41	6	3	0
662955	11.0493	0	1	1	230	2	2	0	1	2	0	31	93	52	18	78	153	3	0	2	0	8	7	8	2	12	4	100	14	99	0	7	0	1	0	0	1	7	4	32	13	73	22	48	4	19	6	8	2
663967	11.0661	0	0	0	233	0	2	0	1	2	1	10	125	45	4	66	176	1	1	1	2	8	3	3	1	9	12	110	28	88	3	0	0	1	0	3	3	13	2	21	14	56	20	66	1	24	1	11	0
664979	11.083	0	0	0	272	0	3	0	0	2	4	18	107	63	10	60	145	7	1	2	1	13	2	8	2	7	5	64	30	66	4	4	1	2	1	4	2	8	9	44	10	79	21	47	0	31	3	3	2
665992	11.0999	0	0	1	242	0	0	1	1	1	3	19	116	56	11	55	130	4	0	0	1	3	5	5	3	13	7	73	12	91	4	0	2	2	2	5	0	4	0	50	2	96	18	46	4	19	3	5	0
667004	11.1167	0	0	3	277	0	0	1	0	4	0	16	110	52	6	69	169	5	3	2	4	10	8	7	1	10	4	125	15	76	1	4	0	5	0	0	1	7	3	47	8	73	20	44	3	20	5	6	0
668016	11.1336	0	1	0	256	0	2	1	3	0	4	12	113	53	4	78	158	7	0	5	0	12	1	6	4	12	4	121	20	66	2	2	0	5	0	0	2	11	0	63	21	61	17	56	7	30	3	6	0
669028	11.1505	0	0	0	218	0	1	0	2	0	5	10	105	61	27	69	191	4	0	5	3	7	10	2	1	12	6	96	23	58	2	0	0	0	1	0	1	10	1	53	6	87	23	64	9	41	6	10	0
670040	11.1673	0	5	0	243	0	0	0	0	6	3	16	125	68	5	75	132	9	1	2	0	7	2	6	5	6	5	85	18	103	1	5	0	9	2	0	1	4	3	58	15	90	21	71	4	44	6	7	0
671053	11.1842	0	0	2	225	1	1	1	1	2	0	20	93	76	12	78	164	3	0	2	0	4	3	8	3	3	11	118	29	76	10	1	0	4	0	0	0	8	1	55	15	102	17	49	6	23	6	8	1
672065	11.2011	0	0	0	251	0	0	0	1	2	1	13	103	52	13	59	169	5	0	3	3	13	2	3	5	14	5	98	13	73	2	1	0	4	0	0	4	8	12	64	18	84	17	41	2	47	3	3	0
673077	11.218	0	0	3	266	0	2	0	2	0	1	20	104	68	17	67	174	7	2	0	1	7	4	13	4	8	4	112	27	92	8	1	0	3	1	6	3	6	5	71	18	100	23	49	3	45	8	8	3
674089	11.2348	0	0	0	220	0	0	0	4	6	2	12	105	59	5	68	158	7	0	7	5	4	0	3	1	21	12	119	16	96	3	3	0	3	0	0	1	2	4	57	14	111	22	52	2	61	6	10	1
675101	11.2517	0	2	0	274	2	0	0	2	1	0	18	114	73	12	83	176	1	0	1	5	13	0	13	2	11	5	126	24	109	9	4	0	2	0	2	4	6	10	52	17	107	23	71	5	46	4	11	4
676114	11.2686	0	0	0	257	0	0	0	0	6	0	14	96	73	17	64	156	5	0	1	0	14	5	3	2	7	3	130	25	66	5	4	0	2	2	3	1	9	4	98	12	93	20	65	10	23	6	14	7
677126	11.2854	0	0	0	256	1	1	0	1	2	3	15	115	77	10	80	155	6	0	3	3	13	7	1	1	14	9	103	23	79	0	0	0	1	1	1	2	6	6	47	22	108	32	64	2	57	5	12	0
678138	11.3023	0	0	0	278	0	0	0	1	0	0	15	115	90	8	91	157	12	0	1	4	11	2	8	7	17	16	140	29	105	2	3	1	1	2	0	3	10	3	39	12	89	19	64	5	56	10	11	0
679150	11.3192	0	0	1	219	0	0	0	2	0	0	24	104	74	10	81	143	9	1	2	2	8	1	6	7	11	7	100	20	84	1	2	0	4	2	4	2	7	0	84	17	88	28	75	3	55	3	8	0
680162	11.336	0	0	2	239	0	0	0	1	2	2	19	117	79	13	93	159	8	0	1	0	7	6	12	0	10	11	120	29	125	4	5	0	0	0	0	2	3	4	67	20	100	23	74	5	56	3	6	1
681174	11.3529	0	0	0	231	0	0	2	3	8	2	11	113	94	23	81	150	4	0	5	2	7	3	9	0	10	19	130	19	98	4	7	2	3	0	0	1	0	6	71	16	121	25	97	2	33	10	11	0
682187	11.3698	0	1	0	254	0	3	2	2	0	0	17	108	110	18	114	171	4	0	4	1	7	5	4	1	6	8	140	26	115	7	1	0	1	1	0	1	15	13	53	23	121	16	66	1	74	4	9	1
683199	11.3866	0	0	0	247	0	2	2	0	0	3	23	134	84	13	110	162	8	0	0	0	7	3	9	1	6	7	132	26	133	10	7	3	2	0	6	4	5	2	25	22	123	29	83	6	69	2	8	0
684211	11.4035	0	0	0	254	0	0	0	5	1	3	12	103	79	18	121	167	1	0	1	0	18	5	9	4	6	13	181	32	157	9	2	1	1	0	0	0	1	6	77	19	165	19	97	4	82	3	2	4
685223	11.4204	0	0	0	277	0	1	0	3	2	6	13	124	96	16	106	153	10	0	6	1	4	0	7	5	17	16	158	30	128	3	2	0	7	0	2	1	9	2	67	16	130	28	71	9	54	2	11	0
686235	11.4373	0	0	1	229	0	0	0	0	2	0	29	97	92	20	113	141	4	1	1	5	3	2	11	1	17	5	163	16	128	15	1	0	2	0	8	3	4	3	61	24	138	19	83	6	47	8	6	4
687248	11.4541	0	1	0	269	0	4	1	0	1	1	28	128	75	20	110	168	7	0	1	0	2	3	3	2	10	7	150	24	101	6	10	0	0	0	3	3	15	5	80	21	126	15	81	9	76	4	19	13
688260	11.471	0	1	0	231	0	0	0	4	0	1	21	119	90	17	132	146	5	0	1	0	4	3	11	5	15	10	188	18	114	2	6	0	7	3	1	2	0	2	103	15	136	28	84	0	57	7	4	3
689272	11.4879	0	0	1	255	0	0	0	0	1	2	17	113	110	17	118	169	15	0	2	1	5	1	6	1	25	15	182	26	159	7	0	0	2	2	5	2	7	6	89	25	138	31	96	5	66	9	8	2
690284	11.5047	0	0	0	244	0	2	1	0	0	5	11	105	102	13	138	167	5	1	1	0	6	8	5	4	8	7	210	34	181	13	4	2	8	0	1	1	5	7	63	17	158	22	101	1	74	2	7	1
691296	11.5216	0	0	0	277	0	1	0	0	1	4	16	104	102	9	109	177	7	1	1	7	7	1	10	1	13	11	203	13	167	10	6	0	4	0	4	0	7	3	75	26	151	48	123	3	58	4	14	2
692308	11.5385	0	0	0	257	0	0	2	5	2	2	15	127	97	15	104	192	1	0	1	0	8	4	3	6	9	9	178	13	185	8	5	0	6	1	0	1	10	0	99	16	147	41	104	2	51	6	11	1
693321	11.5554	0	0	0	219	0	0	1	1	1	2	12	114	94	23	107	154	6	0	3	2	3	7	11	4	16	7	170	23	145	5	6	1	3	1	4	1	5	3	121	23	146	30	91	1	71	4	11	4
694333	11.5722	0	0	0	256	0	0	0	0	2	0	12	113	80	15	155	173	10	0	2	1	7	6	9	0	15	18	176	33	168	3	8	0	4	1	2	4	10	3	123	29	148	40	107	6	65	11	15	6
695345	11.5891	0	0	0	257	0	0	0	1	1	0	25	99	139	15	128	185	8	0	4	0	3	1	3	3	15	8	188	21	175	7	2	0	0	0	2	1	3	2	100	18	144	45	111	7	66	3	10	0
696357	11.6059	0	0	0	213	1	0	1	2	0	3	17	102	102	20	124	198	6	3	6	3	8	1	5	1	13	13	189	27	185	7	4	5	4	2	1	1	12	9	99	12	189	35	130	4	79	4	18	0
697369	11.6228	0	1	0	259	1	7	0	1	5	1	7	135	103	19	158	152	10	1	1	4	9	4	14	8	13	12	199	48	161	9	6	0	4	0	0	2	6	3	91	22	170	32	104	6	76	4	12	3
698382	11.6397	0	0	0	221	0	0	0	3	1	2	23	104	127	22	154	154	16	0	1	0	7	4	2	1	17	13	177	57	181	10	8	0	3	0	0	2	9	3	122	14	192	56	139	7	54	10	13	0
699394	11.6566	0	0	0	205	1	2	1	1	0	0	19	117	105	16	158	170	7	0	3	1	2	5	7	5	13	10	207	35	148	9	1	2	9	5	2	1	15	1	98	31	170	45	116	3	83	1	6	0
700406	11.6734	0	0	0	266	0	1	0	2	3	0	19	115	137	26	139	143	10	1	11	1	6	1	7	6	21	25	222	29	179	4	5	1	7	0	0	0	16	11	95	25	190	60	132	1	77	9	6	3
701418	11.6903	0	0	0	244	0	2	2	1	1	0	23	92	104	27	164	180	14	5	6	0	6	8	11	1	19	20	247	40	190	8	1	0	1	0	3	0	7	8	133	27	209	57	127	7	75	11	6	2
702430	11.7072	0	0	0	247	0	1	1	0	0	1	15	122	105	22	138	132	11	0	4	1	3	2	8	4	14	31	219	46	191	10	2	0	0	0	4	3	12	7	116	23	183	50	74	7	78	20	10	1
703442	11.724	0	0	0	242	1	0	1	0	0	0	24	120	160	19	209	190	6	3	4	1	6	9	13	1	20	13	254	77	236	7	3	0	0	3	5	4	14	10	109	30	235	35	140	11	75	11	8	0
704455	11.7409	0	0	0	244	0	0	0	0	0	2	26	130	185	20	188	185	7	0	0	0	7	3	10	5	18	12	269	67	259	5	12	0	2	2	7	1	7	5	117	30	231	27	171	7	89	3	10	1
705467	11.7578	0	2	0	255	0	0	0	3	0	0	25	129	191	22	201	148	3	0	1	0	7	0	14	9	26	17	271	70	249	8	3	1	2	1	1	1	12	4	119	23	209	46	188	13	87	8	13	3
706479	11.7746	0	0	0	240	0	4	2	1	1	4	16	98	139	18	201	157	12	0	5	1	13	4	8	4	15	18	266	52	265	11	6	0	2	0	3	1	14	6	119	12	229	54	186	6	67	6	13	7
707491	11.7915	0	6	0	257	0	0	2	4	0	3	23	114	131	15	188	149	6	0	3	4	3	0	4	1	14	13	268	72	250	9	6	1	3	0	1	0	0	7	134	25	228	54	202	0	95	6	10	1
708503	11.8084	0	0	1	285	0	0	0	2	1	0	23	123	127	28	174	199	14	3	7	0	4	3	14	2	15	12	270	65	250	7	15	1	2	0	4	0	9	7	129	15	200	65	147	11	104	14	22	1
709516	11.8253	0	0	0	227	5	0	1	0	0	2	14	106	147	22	173	187	18	3	5	4	8	2	5	4	21	13	263	59	252	13	6	1	1	2	3	4	10	5	104	30	236	68	149	11	89	8	16	3
710528	11.8421	0	0	2	240	0	0	1	2	2	5	14	101	170	26	239	155	10	0	2	1	9	5	11	7	18	11	286	78	297	7	2	0	5	0	1	0	13	9	159	21	252	68	196	17	95	8	9	6
711540	11.859	0	3	0	259	0	1	0	3	0	2	22	101	188	21	199	143	8	1	5	2	9	5	5	2	27	17	320	67	259	17	14	2	10	0	0	1	10	16	138	19	252	67	160	11	87	4	14	3
712552	11.8759	0	3	1	288	0	1	1	0	1	1	25	90	166	25	208	162	16	1	2	0	2	3	7	6	32	14	271	67	284	13	9	2	4	1	4	2	5	13	135	24	272	44	171	9	103	3	17	1
713564	11.8927	0	0	0	286	0	0	3	0	4	3	20	111	174	37	237	167	7	1	2	2	7	3	11	0	25	38	304	92	332	11	6	2	2	0	1	2	18	11	153	44	280	56	213	10	78	7	6	3
714576	11.9096	0	0	3	238	0	0	0	3	2	6	18	95	191	18	265	154	8	1	6	0	7	12	6	1	32	17	270	92	286	22	7	1	4	1	0	1	10	9	140	46	255	68	212	6	80	10	12	2
715589	11.9265	0	5	3	200	0	0	2	0	3	1	19	108	183	37	270	169	10	0	3	5	10	8	10	2	14	18	313	87	377	21	8	1	3	1	2	2	15	7	129	40	306	60	193	18	96	16	12	0
716601	11.9434	0	0	0	242	0	1	0	6	0	4	36	141	171	41	226	166	11	0	3	0	8	4	15	8	12	19	311	85	306	16	13	0	0	0	1	4	19	13	150	24	298	67	182	16	92	21	6	4
717613	11.9602	0	0	1	202	0	3	0	2	1	9	42	103	173	43	270	169	11	0	2	2	6	6	12	2	26	22	326	69	329	12	5	0	0	2	1	0	16	9	152	31	288	81	192	12	92	13	15	13
718625	11.9771	0	0	1	218	0	5	0	1	0	2	23	108	192	21	243	184	11	0	2	2	4	13	4	3	15	19	362	108	325	13	2	0	10	0	0	3	16	6	153	24	288	76	245	7	102	21	15	1
719637	11.9939	0	5	0	239	0	0	1	0	3	2	16	115	212	21	244	163	13	0	3	1	4	6	10	2	23	18	346	92	346	19	8	0	0	1	0	2	8	14	146	30	334	81	224	13	100	17	10	3
720650	12.0108	0	0	1	233	0	5	0	7	0	3	16	108	185	16	259	189	10	0	1	2	4	2	6	3	29	18	408	87	381	23	16	1	0	0	4	1	13	5	192	28	332	67	216	9	99	18	20	0
721662	12.0277	0	0	2	256	0	2	0	2	5	5	26	101	158	16	267	163	5	0	4	5	6	2	11	4	15	18	366	70	352	15	4	1	0	0	5	1	15	15	155	44	329	73	229	18	103	7	13	0
722674	12.0446	0	0	0	227	0	0	1	2	0	7	21	112	215	20	292	163	10	2	5	0	8	1	4	3	15	15	319	101	352	14	2	3	4	1	2	1	16	6	192	29	292	106	233	15	79	17	17	6
723686	12.0614	0	0	0	252	0	0	3	4	2	1	23	118	220	29	281	179	8	1	0	1	5	2	4	1	25	13	357	104	322	15	12	1	7	1	4	4	9	3	159	16	280	79	206	16	109	4	18	1
724698	12.0783	0	0	0	214	1	2	3	2	0	3	17	109	199	32	257	170	15	0	9	0	7	2	7	0	18	13	401	97	362	15	15	0	5	5	4	5	12	10	203	56	347	102	203	4	125	13	24	2
725710	12.0952	0	0	1	240	1	1	2	4	3	1	28	100	200	21	346	158	16	0	1	3	10	6	5	11	18	31	375	77	326	21	6	2	8	0	1	2	26	4	147	68	337	84	270	10	112	12	27	3
726723	12.112	0	1	1	230	0	0	1	1	2	0	33	107	228	26	264	155	11	0	2	1	7	7	4	9	25	26	385	86	379	15	8	1	3	0	3	5	9	13	208	63	401	92	248	19	118	16	14	3
727735	12.1289	0	0	1	215	0	1	0	1	0	1	26	100	282	22	323	178	9	0	3	3	6	5	15	5	23	22	461	118	419	22	17	0	6	2	4	0	22	12	193	70	353	93	289	14	121	7	14	3
728747	12.1458	0	1	0	224	0	0	0	2	2	1	13	115	281	27	434	165	15	5	4	1	11	3	8	3	24	32	532	99	635	22	2	2	4	0	0	1	16	10	220	67	410	135	467	13	112	16	16	3
729759	12.1626	0	0	0	235	0	2	1	0	0	3	24	104	227	20	461	129	13	0	3	2	14	8	9	4	16	25	459	133	544	34	5	0	1	0	0	4	10	14	227	65	399	106	400	10	133	10	19	1
730771	12.1795	0	2	0	220	0	4	0	3	0	1	35	101	233	24	408	188	14	0	2	0	10	2	9	5	19	32	482	120	534	9	4	1	2	0	2	0	22	0	197	76	402	113	368	13	93	23	13	4
731784	12.1964	0	0	0	226	0	6	1	3	1	9	16	120	245	28	369	173	14	3	6	0	6	5	14	2	30	21	461	113	465	19	17	2	2	0	3	4	17	13	194	53	458	110	329	10	144	9	20	4
732796	12.2133	0	0	0	203	0	0	1	1	2	0	40	98	270	40	316	184	6	1	1	3	7	5	12	2	29	18	489	98	413	24	13	0	6	2	0	0	14	9	202	67	386	82	274	14	142	9	22	0
733808	12.2301	0	0	1	189	0	0	0	4	1	1	23	119	246	19	335	137	16	3	0	3	6	3	11	4	40	21	446	105	410	21	14	1	2	0	6	2	9	14	263	46	428	103	274	5	134	8	19	0
734820	12.247	0	1	1	233	1	1	2	3	1	1	29	114	263	41	307	159	21	1	1	1	5	10	7	4	32	21	549	92	463	30	12	1	4	1	2	0	12	2	227	59	437	98	328	6	151	13	21	0
735832	12.2639	0	0	1	196	0	1	0	3	3	4	34	113	218	40	349	190	8	0	2	3	8	4	15	0	22	21	480	105	452	9	6	0	5	0	2	8	20	9	222	41	413	101	262	13	108	8	22	2
736844	12.2807	0	1	1	241	0	5	0	1	0	0	45	100	300	62	450	147	15	3	2	0	4	3	5	6	33	18	530	146	694	21	12	0	1	0	1	2	20	17	252	63	529	114	416	15	128	16	20	6
737857	12.2976	0	2	2	256	0	0	0	0	2	3	23	118	361	47	461	173	14	5	2	0	12	4	8	3	27	27	548	164	629	27	7	1	6	0	3	3	20	16	278	63	475	169	432	10	120	10	20	3
738869	12.3145	0	0	0	229	0	0	0	0	0	2	19	116	321	37	422	178	9	2	3	0	14	7	12	10	34	21	484	125	601	18	9	0	5	0	4	1	20	13	235	62	478	126	414	24	147	23	19	7
739881	12.3314	0	1	0	195	3	1	0	0	1	4	31	127	372	44	453	168	17	0	4	0	3	6	19	7	25	30	495	103	521	21	1	5	6	1	1	1	17	16	247	77	484	111	340	15	142	13	25	5
740893	12.3482	0	1	0	224	0	0	3	1	2	0	39	92	301	68	551	146	14	0	2	0	13	3	9	0	27	30	551	118	648	24	8	0	7	0	3	4	22	11	232	72	466	130	427	15	132	22	17	4
741905	12.3651	0	2	0	233	0	0	0	6	1	2	36	121	321	62	449	177	21	0	9	5	9	3	10	4	26	17	582	181	671	14	7	2	5	2	3	2	17	16	269	80	512	154	520	32	144	15	7	6
742918	12.382	0	0	1	221	0	0	1	5	0	1	36	111	307	64	486	178	7	2	2	0	5	6	17	10	37	31	644	160	686	21	13	1	1	0	1	0	26	16	273	82	551	151	495	19	152	20	19	6
743930	12.3988	0	0	0	231	0	0	0	1	4	4	46	128	365	64	519	157	11	0	4	0	2	4	15	8	23	34	649	180	664	25	9	7	2	0	0	5	21	17	314	118	588	198	458	21	157	12	15	2
744942	12.4157	0	1	2	205	0	1	0	0	2	3	17	103	328	47	505	184	10	0	2	2	5	11	4	7	50	23	618	187	596	29	9	0	8	3	1	2	12	16	246	116	556	129	427	24	164	17	9	11
745954	12.4326	0	1	0	237	0	0	3	2	5	5	23	101	324	36	483	172	10	0	7	1	1	8	14	4	53	16	628	148	652	27	11	1	10	3	7	2	9	7	268	72	553	173	443	23	176	15	27	0
746966	12.4494	0	2	0	214	0	0	0	2	0	4	27	94	337	52	475	169	17	0	0	2	7	10	15	8	51	28	625	193	617	37	17	0	5	2	0	3	10	14	250	85	530	173	409	13	167	17	16	3
747978	12.4663	0	0	0	212	0	0	0	0	3	0	35	102	303	23	449	177	11	3	5	0	6	5	10	6	30	31	600	130	600	24	11	0	5	0	10	4	17	13	266	64	501	133	365	33	134	15	12	1
748991	12.4832	0	0	2	204	0	1	3	6	3	3	21	121	328	67	546	180	14	5	5	1	7	2	11	10	23	19	650	179	621	21	11	1	1	2	2	4	29	21	303	92	675	151	398	12	187	14	13	8
750003	12.5	0	4	0	195	0	0	0	5	0	10	45	100	346	51	527	191	16	0	5	0	6	3	12	11	5	20	695	135	627	23	9	2	2	1	0	5	19	14	334	113	585	147	413	21	118	23	22	2
751015	12.5169	0	0	2	204	0	1	0	7	0	2	21	123	353	58	561	178	23	0	3	0	5	3	6	4	44	34	641	158	709	22	5	2	4	0	5	5	16	15	352	90	633	159	439	15	168	20	5	2
752027	12.5338	0	1	0	246	0	0	0	6	2	9	30	117	403	53	584	179	13	0	5	1	16	2	16	5	30	44	721	192	815	25	10	0	2	0	8	0	18	14	375	86	703	164	532	21	166	17	25	0
753039	12.5506	0	0	0	232	0	0	1	5	1	2	42	112	482	79	632	153	18	4	2	0	9	4	13	7	38	43	888	218	1036	31	10	1	5	0	1	1	26	17	360	121	686	223	642	22	156	13	18	1
754052	12.5675	0	1	1	219	0	0	0	8	1	0	30	83	407	80	607	176	18	0	6	7	11	1	12	2	39	19	713	190	901	24	9	1	6	2	2	2	33	26	357	116	724	199	509	23	176	17	13	7
755064	12.5844	0	2	1	192	0	1	0	1	2	2	31	98	340	59	586	168	15	2	3	1	3	10	11	3	29	28	743	168	756	29	7	1	4	5	5	2	18	15	344	110	676	166	472	21	204	25	24	0
756076	12.6013	0	1	1	240	0	0	2	4	1	0	26	104	441	59	569	172	19	0	10	0	13	10	13	4	26	29	838	168	758	21	3	0	4	4	1	3	15	23	421	89	778	213	468	25	189	14	29	0
757088	12.6181	0	0	0	210	1	0	0	2	2	7	33	118	368	58	571	146	7	0	0	1	6	6	7	1	43	27	767	167	757	30	14	0	4	0	6	7	17	20	329	112	750	193	478	17	162	11	15	8
758100	12.635	0	3	0	230	0	3	3	1	2	4	33	126	436	61	650	189	12	0	2	2	12	3	8	7	35	27	801	165	759	23	17	1	7	0	11	6	19	17	396	117	718	141	518	18	181	11	18	1
759112	12.6519	0	0	2	225	0	3	0	4	1	5	45	98	453	76	752	203	20	0	4	0	10	4	10	4	38	45	903	258	1017	26	20	2	7	0	0	6	13	25	419	130	758	205	619	25	174	22	26	8
760125	12.6687	0	5	0	223	1	0	0	0	4	1	67	91	538	124	982	178	6	6	3	5	5	9	28	4	76	58	953	245	1311	49	17	2	10	0	4	4	29	28	428	157	866	258	885	18	182	26	34	8
761137	12.6856	0	1	1	219	0	0	0	0	0	6	60	122	471	68	849	172	17	3	3	0	1	6	6	3	67	50	938	276	1095	50	9	1	7	0	6	2	36	24	384	115	919	266	884	27	209	10	17	3
762149	12.7025	0	1	0	210	0	1	1	2	2	9	63	114	459	94	748	139	15	3	1	0	7	5	13	7	51	20	913	221	995	53	19	0	6	0	6	2	23	14	400	122	791	203	647	3	185	12	19	0
763161	12.7194	0	0	0	205	0	1	0	0	2	4	52	101	408	94	693	199	14	0	7	3	7	5	19	8	53	27	918	200	918	22	19	0	7	1	8	5	23	18	405	148	801	207	594	21	162	20	30	2
764173	12.7362	0	0	1	191	0	2	1	0	0	10	41	101	502	96	677	200	12	1	5	3	11	7	10	7	29	43	906	190	963	33	12	6	0	0	2	4	24	19	372	108	850	228	589	24	181	15	21	7
765186	12.7531	0	0	1	224	0	0	1	4	2	8	41	83	564	101	964	158	16	1	2	2	2	6	8	3	79	48	1065	281	1256	67	13	0	4	4	3	2	20	16	430	122	942	302	974	26	226	14	17	8
766198	12.77	0	0	0	206	0	0	0	2	3	2	56	104	614	108	953	198	11	1	3	0	9	7	14	11	72	72	1154	329	1289	74	18	0	10	5	6	2	20	24	430	140	962	278	854	23	222	11	28	9
767210	12.7868	0	0	0	208	0	0	0	1	4	2	61	94	547	85	910	173	12	1	7	1	10	5	8	9	63	58	1061	243	1173	65	14	1	8	2	6	5	28	23	451	140	996	270	794	41	241	21	18	5
768222	12.8037	0	4	0	232	0	1	1	1	2	0	62	124	567	92	808	167	14	4	2	1	4	12	8	2	84	59	1034	256	1041	46	16	3	7	3	1	7	28	18	419	120	1002	205	764	65	229	16	24	3
769234	12.8206	0	2	1	196	0	0	1	0	0	2	63	93	502	85	759	185	27	2	5	0	4	6	9	8	56	68	977	268	1154	34	21	2	8	3	7	5	16	20	521	108	974	223	722	45	186	28	25	3
770246	12.8374	0	0	0	220	0	2	1	3	0	1	56	108	537	68	781	198	28	0	8	6	7	11	10	7	51	35	1069	246	1033	48	13	0	18	0	10	1	21	27	476	131	978	266	751	12	204	13	34	1
771259	12.8543	0	0	1	205	0	0	1	0	1	6	69	96	517	96	853	213	17	0	1	1	10	5	8	6	64	57	1059	254	1268	53	13	2	1	2	4	8	16	16	529	156	995	223	737	33	221	24	22	2
772271	12.8712	0	1	0	211	0	0	0	4	0	2	55	120	567	80	863	181	24	4	4	3	10	5	10	12	71	58	1149	237	1137	53	14	2	7	0	0	4	16	22	558	112	1045	235	729	48	227	27	26	0
773283	12.888	0	3	0	202	0	0	0	1	0	3	56	106	535	96	916	196	24	0	3	1	4	10	12	9	69	57	1108	264	1195	55	10	0	7	0	7	2	30	38	570	201	1193	268	747	46	227	12	28	2
774295	12.9049	0	4	0	178	0	1	0	1	2	0	58	106	546	88	974	195	19	0	4	6	4	11	28	3	72	65	1118	287	1225	55	17	1	6	3	3	0	23	15	525	163	1095	257	833	21	235	25	27	1
775307	12.9218	0	0	0	244	2	2	2	5	1	4	66	102	572	130	1064	180	18	1	3	5	4	5	18	8	78	62	1237	314	1326	31	18	1	9	0	4	4	47	28	572	181	1163	306	926	22	232	22	17	5
776320	12.9387	0	2	0	223	0	4	2	2	1	0	64	107	654	110	1013	184	15	1	3	0	13	3	15	10	82	79	1221	291	1348	37	21	0	11	0	3	1	22	26	587	163	1193	376	897	46	226	24	19	4
777332	12.9555	0	0	1	194	0	2	1	4	2	2	73	97	611	111	973	190	31	1	2	1	4	4	23	8	67	83	1238	298	1276	21	15	0	6	3	4	8	28	23	574	151	1105	286	817	39	264	27	23	2
778344	12.9724	0	0	0	214	0	1	0	0	1	6	80	86	613	108	946	205	26	1	4	2	3	5	16	5	71	78	1260	314	1298	59	20	0	5	2	5	2	23	37	577	152	1099	288	796	16	212	15	41	2
779356	12.9893	0	1	2	176	0	1	1	10	2	1	69	91	661	110	903	174	23	2	7	0	4	13	15	11	82	86	1317	279	1180	63	27	2	9	0	9	0	24	26	605	138	1186	268	748	31	254	19	28	8
780368	13.0061	0	0	1	190	0	1	0	3	3	8	83	89	615	99	1037	172	17	2	4	1	2	5	19	10	60	76	1341	269	1314	60	16	3	8	0	6	1	25	16	583	158	1239	276	825	55	283	19	18	5
781380	13.023	0	0	3	179	0	2	6	6	0	4	66	114	727	117	1179	173	35	0	3	0	9	2	19	6	89	83	1434	391	1744	56	16	0	14	5	2	4	31	13	606	217	1295	324	1253	59	286	27	21	2
782393	13.0399	0	1	1	197	0	1	2	2	6	3	103	115	855	170	1335	220	15	1	10	2	7	6	3	16	60	90	1559	379	2034	53	14	2	7	4	10	1	25	31	629	190	1433	367	1452	75	262	23	42	4
783405	13.0567	0	8	1	204	0	2	4	2	0	10	82	120	820	177	1546	171	20	0	5	0	7	0	21	10	77	95	1548	456	2105	80	22	5	6	2	5	4	34	21	664	183	1421	397	1443	90	236	21	29	3
784417	13.0736	0	0	0	304	0	1	2	2	7	4	94	121	654	121	1233	189	15	1	3	2	7	10	17	13	75	92	1583	425	1964	77	13	3	11	3	6	4	16	32	675	177	1448	376	1308	54	289	29	36	5
785429	13.0905	0	0	1	187	2	5	1	2	5	8	89	126	674	123	1155	191	30	3	8	0	9	10	7	5	54	64	1400	339	1676	58	26	1	10	4	7	4	16	24	634	186	1328	344	1072	64	298	27	33	5
786441	13.1074	0	0	0	216	0	0	0	0	1	10	74	114	725	109	1110	211	22	3	4	1	5	14	18	6	66	80	1395	333	1392	84	24	1	11	1	4	2	19	23	690	205	1315	356	1000	68	283	25	20	5
787454	13.1242	0	2	3	162	0	0	0	1	4	3	77	105	737	127	1282	217	12	5	5	2	9	6	13	3	70	92	1430	381	1549	64	15	1	9	0	0	0	23	37	750	188	1420	373	1063	62	265	29	26	2
788466	13.1411	0	0	0	199	0	1	1	2	3	9	81	105	770	143	1221	173	21	3	10	2	5	9	22	5	89	88	1477	441	1721	75	20	3	10	1	8	2	27	29	677	213	1551	391	1220	65	263	44	27	9
789478	13.158	0	0	0	202	1	0	2	1	2	6	101	120	751	117	1391	203	15	6	6	2	4	3	13	10	88	116	1667	388	1841	94	28	2	9	0	6	3	23	26	744	235	1578	435	1312	76	259	20	26	2
790490	13.1748	0	4	2	170	0	2	4	0	0	6	87	115	782	155	1337	173	23	2	4	1	4	12	17	11	91	86	1587	423	1773	85	21	3	12	1	10	9	38	20	749	227	1547	417	1194	40	323	30	31	8
791502	13.1917	0	0	2	203	0	0	2	2	5	3	94	99	763	171	1264	195	26	0	7	2	3	12	12	14	76	83	1645	383	1698	82	16	2	10	0	8	2	51	17	721	240	1526	424	1242	71	260	25	16	3
792514	13.2086	0	0	1	195	0	0	1	1	2	2	76	114	725	144	1239	179	22	6	3	2	9	11	25	1	79	65	1561	391	1687	65	25	2	16	4	6	1	28	18	753	220	1502	369	1052	38	296	31	24	15
793527	13.2255	0	0	0	196	0	0	0	4	3	10	96	105	792	109	1279	168	32	1	8	1	10	19	12	9	85	85	1584	371	1493	62	21	9	3	1	4	5	32	24	825	189	1445	324	1054	61	335	15	31	5
794539	13.2423	0	4	1	208	0	0	0	0	8	10	77	113	773	130	1210	203	28	4	5	1	3	6	11	10	70	88	1524	340	1549	78	23	2	15	1	6	2	24	19	750	232	1408	388	1057	52	296	26	26	8
795551	13.2592	0	0	0	193	3	2	0	2	2	8	95	101	829	133	1279	186	24	3	8	9	3	5	32	6	92	97	1741	426	1741	66	26	0	6	5	8	3	24	22	805	224	1633	366	1237	56	278	22	30	8
796563	13.276	0	0	0	164	0	0	2	4	1	3	77	112	858	155	1273	200	21	4	3	3	2	7	14	18	81	93	1613	447	1767	51	26	3	11	2	0	2	20	34	755	212	1609	362	1219	70	351	20	23	1
797575	13.2929	0	7	1	193	2	7	1	5	0	1	77	102	823	167	1351	208	19	0	0	1	6	10	16	13	114	95	1710	440	1822	81	24	0	10	1	6	1	38	49	811	227	1559	392	1353	72	340	28	45	2
798588	13.3098	0	0	1	210	0	1	0	6	2	7	82	97	830	151	1490	235	29	2	11	0	9	14	27	6	115	117	1806	429	1954	82	19	1	9	0	2	5	57	39	837	182	1682	386	1316	63	322	19	45	4
799600	13.3267	0	4	0	163	0	0	1	3	0	0	81	130	861	137	1459	221	23	2	5	1	8	7	30	12	110	121	1823	371	1938	93	18	1	4	1	9	2	41	24	859	229	1689	415	1286	57	276	28	46	4
800612	13.3435	0	0	0	203	0	0	0	1	0	1	103	95	840	120	1371	187	25	0	4	3	12	10	23	6	84	95	1780	434	1874	92	16	3	5	4	2	3	36	21	764	207	1594	398	1145	60	302	30	32	5
801624	13.3604	0	0	1	186	0	1	0	1	1	2	109	117	883	148	1427	165	30	5	6	0	10	13	17	18	71	99	1789	455	1994	79	14	5	5	0	5	2	32	40	782	234	1626	435	1404	61	299	28	31	12
802636	13.3773	0	2	0	213	2	0	1	2	1	8	83	92	899	152	1619	205	23	1	6	1	5	3	8	13	96	104	1728	431	2094	90	26	7	12	4	8	1	40	32	803	217	1716	408	1325	83	305	25	31	2
803648	13.3941	0	6	1	190	1	0	2	7	5	6	84	106	876	181	1587	216	19	5	4	1	8	7	17	10	95	112	1894	405	2150	130	17	0	11	0	10	1	52	51	843	215	1820	486	1449	91	329	33	31	9
804661	13.411	0	0	1	174	1	0	4	1	2	3	107	116	1087	228	2077	255	22	0	3	2	9	13	20	21	115	164	2163	594	3034	131	19	2	12	4	8	5	26	43	841	281	1957	576	2087	109	335	30	36	4
805673	13.4279	0	3	1	191	0	0	0	1	1	6	97	121	1012	195	1943	212	19	4	7	0	6	10	20	9	103	117	2119	599	2718	145	14	0	3	0	13	2	28	41	961	265	1872	490	1919	106	351	29	62	5
806685	13.4448	0	14	1	161	0	0	1	3	3	4	107	114	981	139	1751	176	25	1	7	0	7	11	17	11	103	119	1921	537	2425	110	26	1	11	2	8	5	42	19	859	262	1921	467	1714	108	349	21	41	9
807697	13.4616	0	5	1	159	1	0	0	3	1	6	104	103	979	205	1675	211	16	2	8	2	6	11	11	7	118	128	2038	467	2336	97	18	4	14	3	6	5	37	33	988	279	1913	563	1605	86	410	31	20	1
808709	13.4785	0	0	0	141	0	0	0	6	6	3	100	94	877	159	1692	204	35	0	6	2	4	10	19	16	102	94	1999	446	2307	121	19	1	14	3	14	7	50	32	956	266	2018	516	1530	66	397	21	24	5
809722	13.4954	0	13	1	234	4	1	0	0	3	7	81	90	932	155	1633	192	20	2	7	0	1	12	15	13	111	106	1865	463	2112	100	20	1	8	3	1	5	46	50	894	249	1904	490	1383	60	384	17	31	6
810734	13.5122	0	0	4	184	0	0	0	1	9	2	94	113	1009	187	1728	247	17	2	0	1	10	8	31	17	120	125	1999	564	2363	108	27	1	16	1	13	3	50	53	958	277	2008	571	1525	96	407	21	47	2
811746	13.5291	0	0	1	194	0	0	0	2	6	6	110	77	957	187	1833	216	23	3	9	0	9	10	25	11	116	108	2058	504	2404	124	23	4	11	2	9	7	59	42	1066	287	2121	540	1627	88	381	42	28	9
812758	13.546	0	0	0	194	1	0	1	0	4	5	88	83	1059	212	1866	219	27	0	8	2	7	9	20	4	141	119	2166	563	2445	113	25	0	21	3	3	2	48	48	1022	286	2052	528	1477	90	372	28	34	8
813770	13.5628	0	3	0	178	0	3	1	1	6	4	106	123	1087	164	1762	177	26	3	8	2	8	9	19	9	132	125	2262	546	2525	98	14	2	18	7	6	6	27	36	1069	327	2058	474	1611	100	381	32	34	6
814782	13.5797	0	4	3	204	0	0	0	3	4	2	102	113	1116	217	1944	232	29	0	6	1	8	3	27	1	117	140	2105	619	2550	129	17	1	12	5	8	5	19	25	983	282	2112	557	1733	90	368	41	61	7
815795	13.5966	0	3	7	173	1	1	0	1	3	3	97	115	1090	206	1805	205	19	0	4	2	11	7	20	11	90	112	2201	588	2503	115	17	7	12	1	8	8	45	39	1016	279	2151	501	1712	99	400	47	43	6
816807	13.6135	0	1	2	193	0	1	1	7	3	6	104	108	1110	197	1817	173	34	0	10	1	10	14	19	19	116	120	2141	586	2559	131	35	5	17	1	2	10	52	44	1025	278	2181	559	1662	80	345	49	44	13
817819	13.6303	0	10	5	213	0	0	4	0	5	12	91	121	1085	189	1758	228	27	3	8	3	13	15	14	11	104	87	2146	528	2359	91	27	2	11	7	6	3	57	42	1051	275	2154	531	1530	93	384	42	26	14
818831	13.6472	0	0	0	165	0	0	0	1	1	4	92	100	961	128	1736	197	22	0	2	6	4	11	23	13	76	127	1990	475	2393	91	30	0	10	2	18	6	58	48	904	293	1972	498	1481	78	395	20	47	17
819843	13.664	0	4	0	192	0	3	2	3	4	0	109	116	1070	192	1838	220	15	2	4	0	12	13	17	9	138	113	2106	497	2449	94	16	4	12	2	13	4	51	31	1029	283	2209	557	1681	76	416	41	54	9
820856	13.6809	0	0	0	201	0	4	2	4	0	7	97	114	1096	190	1833	206	21	2	8	3	6	10	15	15	120	133	2093	584	2474	100	23	0	24	2	3	2	47	20	981	328	2093	541	1750	90	414	31	52	11
821868	13.6978	0	6	0	192	0	0	0	3	4	4	115	124	1112	205	1979	223	26	1	9	0	6	9	21	19	137	127	2311	499	2682	118	30	5	9	0	20	3	41	41	1096	347	2307	538	1829	102	393	22	57	9
822880	13.7147	0	0	0	180	0	3	0	1	5	7	115	141	1158	187	2076	209	28	1	4	0	6	21	20	16	137	114	2435	575	2902	113	19	2	19	3	7	1	59	64	1096	340	2254	586	1969	86	403	25	48	8
823892	13.7315	0	0	3	176	1	0	0	1	6	6	135	100	1114	174	1954	213	25	4	13	1	8	6	20	12	142	112	2324	550	2522	113	22	0	16	2	9	2	33	23	1090	301	2309	584	1844	112	410	22	42	6
824904	13.7484	0	1	2	163	3	2	0	3	3	4	99	122	1126	180	1910	241	32	3	4	3	4	10	17	10	129	155	2224	547	2495	135	28	2	11	4	10	1	51	45	974	322	2222	550	1708	86	414	49	32	0
825916	13.7653	0	0	0	185	0	0	1	6	6	9	77	123	1150	203	1994	237	29	1	6	1	10	13	27	4	122	133	2318	578	2823	108	48	1	10	2	10	4	57	36	1011	348	2378	549	1889	116	419	54	31	5
826929	13.7821	0	0	0	162	0	0	0	0	2	7	124	107	1079	194	2050	244	24	0	2	4	9	16	26	9	144	147	2453	676	3198	144	22	0	13	2	7	3	45	50	1051	360	2315	647	2153	132	438	22	32	7
827941	13.799	0	0	5	192	0	0	1	7	6	5	114	108	1213	221	2244	198	24	0	12	2	9	13	21	17	144	132	2433	661	3376	138	23	2	18	0	11	3	23	44	1206	304	2557	678	2198	117	436	46	33	5
828953	13.8159	0	0	2	164	0	1	1	3	6	9	98	113	1245	236	2390	220	12	6	14	4	9	5	19	10	113	133	2460	667	3431	136	31	0	8	6	6	1	47	56	1158	342	2556	672	2300	105	457	55	34	2
829965	13.8328	0	0	1	176	0	1	0	1	2	8	103	114	1396	288	2675	254	25	5	9	3	8	12	28	15	121	177	2830	819	4359	221	17	2	15	2	4	7	57	57	1105	349	2706	723	2935	186	404	57	39	9
830977	13.8496	0	4	3	191	0	0	1	2	2	8	106	101	1316	269	2550	244	34	3	7	4	6	6	24	14	151	141	2619	742	3803	167	25	1	8	1	4	3	77	45	1172	345	2503	707	2545	130	425	39	31	6
831990	13.8665	0	2	3	176	0	0	0	0	1	9	136	125	1229	238	2236	235	25	0	2	1	7	7	16	6	125	150	2533	602	3152	140	33	4	12	2	7	9	65	40	1131	321	2504	610	2145	141	423	30	46	13
833002	13.8834	0	0	0	183	0	0	2	2	7	12	124	125	1149	228	2157	245	27	1	4	6	5	13	17	12	149	133	2469	634	2911	134	23	1	14	2	7	5	51	24	1195	361	2492	681	1953	111	396	23	42	12
834014	13.9002	0	0	0	170	0	2	0	3	2	4	103	143	1242	204	1982	214	22	1	6	1	7	12	23	13	129	160	2672	630	2931	169	13	0	14	1	8	8	64	75	1226	393	2613	628	1918	117	426	22	38	24
835026	13.9171	0	0	0	182	1	0	1	5	5	10	118	125	1220	220	2026	202	22	5	6	2	9	11	14	13	105	125	2329	619	2739	138	23	5	12	1	4	4	65	62	1175	354	2338	606	1917	104	402	42	37	7
836038	13.934	0	14	1	220	0	1	2	2	2	3	112	142	1033	207	2092	218	20	2	7	0	6	12	25	13	133	156	2338	646	2965	121	17	4	10	4	15	6	64	38	1258	365	2377	617	1925	117	390	51	64	8
837050	13.9508	0	8	0	183	1	0	0	0	2	6	109	120	1246	235	2222	246	30	0	12	0	8	15	23	10	127	141	2618	668	3015	161	19	0	9	0	5	5	50	53	1213	368	2558	685	2043	132	478	62	39	5
838063	13.9677	0	3	0	184	0	1	0	3	1	3	98	113	1283	236	2107	223	18	2	5	2	6	23	20	6	123	143	2424	613	3070	112	29	0	13	5	4	4	66	70	1127	321	2603	642	2123	85	430	30	33	1
839075	13.9846	0	8	2	189	0	0	0	1	9	12	120	113	1167	260	2421	234	31	4	8	2	7	16	20	5	151	151	2660	730	3182	124	18	2	12	1	8	7	61	59	1194	416	2575	627	2209	118	434	31	56	14
840087	14.0015	0	7	0	163	0	0	2	4	4	7	118	125	1260	239	2297	226	16	5	1	3	3	12	13	8	136	166	2763	773	3332	132	26	2	22	3	7	2	56	63	1193	374	2487	684	2058	165	475	44	60	13
841099	14.0183	0	2	0	190	0	0	0	2	12	8	137	103	1397	195	2456	194	20	5	8	4	4	19	17	4	133	162	2792	778	3535	143	23	3	16	4	11	2	76	74	1228	390	2654	687	2403	139	430	26	19	7
842111	14.0352	0	0	0	190	0	0	0	0	4	5	143	104	1381	257	2603	268	34	2	3	2	4	10	26	13	148	156	3001	864	4166	200	23	1	14	4	9	3	57	53	1329	351	2845	796	2803	202	459	12	27	8
843124	14.0521	0	0	2	173	0	0	0	3	5	6	136	119	1407	247	2600	258	34	3	4	1	4	15	20	13	129	174	2938	793	3916	194	21	0	15	0	11	1	66	48	1235	379	2887	743	2826	158	433	31	54	9
844136	14.0689	0	4	2	182	0	0	0	4	6	12	112	106	1421	257	2633	252	31	1	11	1	5	12	32	5	130	152	2970	781	3938	163	29	0	13	5	8	6	81	57	1276	376	3017	740	2744	151	445	44	57	5
845148	14.0858	0	4	1	173	0	0	1	5	16	6	117	107	1279	214	2226	242	30	4	12	2	6	8	20	9	139	124	2667	750	3428	137	28	3	12	6	4	6	64	55	1304	411	2719	683	2381	117	437	53	52	9
846160	14.1027	0	4	2	188	0	1	0	3	10	11	126	83	1275	238	2336	259	26	6	6	4	3	10	16	14	127	146	2736	734	3101	149	22	3	19	6	7	2	49	57	1286	351	2634	710	2259	172	459	22	42	1
847172	14.1195	0	11	2	200	0	0	0	6	10	9	100	124	1276	224	2303	237	21	4	1	1	8	20	20	17	156	155	2703	679	3301	138	26	1	12	3	7	0	45	67	1157	364	2679	690	2198	117	470	48	75	3
848184	14.1364	0	0	1	221	2	1	0	4	4	11	126	126	1256	219	2296	216	30	1	13	7	8	17	23	17	142	132	2801	696	3378	135	28	3	15	2	11	0	57	45	1273	358	2673	742	2191	120	406	41	47	9
849197	14.1533	0	0	1	179	0	4	1	2	3	10	99	107	1342	255	2551	219	27	2	6	1	7	11	15	18	129	140	2905	690	3522	147	15	1	9	0	6	2	60	53	1325	396	2761	690	2412	168	447	32	66	12
850209	14.1701	0	8	0	177	0	0	2	3	2	8	145	100	1368	252	2429	251	22	3	4	3	3	15	24	12	166	179	2886	817	3843	181	29	3	9	0	14	3	51	62	1287	416	2836	783	2614	153	457	22	48	8
851221	14.187	0	6	1	173	0	0	0	2	6	11	128	108	1297	221	2203	221	19	2	12	1	10	11	26	12	136	123	2805	739	3578	129	23	4	12	1	7	1	46	58	1184	364	2749	828	2233	116	435	31	52	5
852233	14.2039	0	11	2	202	1	3	2	2	4	13	122	113	1234	225	2244	227	28	3	9	1	11	14	30	11	124	158	2754	688	3290	136	15	2	20	5	12	2	50	57	1299	370	2604	668	2238	157	498	55	53	9
853245	14.2208	0	6	0	207	0	0	3	0	4	8	142	121	1253	249	2438	269	39	0	10	0	5	8	16	12	156	156	2750	778	3477	146	30	7	19	4	11	4	65	53	1283	416	2658	737	2233	153	468	26	47	7
854258	14.2376	0	0	3	157	0	3	0	2	4	12	110	110	1269	239	2323	217	28	0	6	6	4	9	20	11	111	140	2822	731	3326	172	19	3	15	3	9	5	71	37	1286	408	2710	734	2194	126	449	22	51	7
855270	14.2545	0	0	2	159	1	1	0	3	5	12	126	114	1279	218	2395	245	30	3	4	2	8	11	20	15	121	132	2751	635	3367	132	18	4	10	3	6	2	62	70	1250	389	2784	745	2249	122	436	25	24	4
856282	14.2714	0	0	1	192	0	0	1	2	6	6	130	121	1301	220	2387	271	25	0	7	4	7	8	25	12	118	177	2858	789	3605	177	26	9	11	8	10	2	77	77	1246	350	3027	786	2402	110	472	25	37	16
857294	14.2882	0	17	0	198	0	0	2	2	4	7	133	98	1297	255	2730	232	26	2	3	3	17	16	29	9	136	154	2867	829	3972	195	30	3	14	5	13	6	57	68	1318	419	2879	807	2738	148	457	47	59	8
858306	14.3051	0	9	0	159	0	0	0	2	3	4	142	135	1642	359	3373	274	23	0	4	10	12	7	23	23	129	189	3180	963	5125	232	27	8	11	5	11	7	59	62	1431	399	3101	899	3515	235	433	41	54	7
859318	14.322	0	0	1	169	0	0	2	1	3	8	161	127	1512	310	2995	277	29	0	5	2	3	16	24	15	145	166	3273	946	4433	200	23	2	13	2	5	2	72	74	1389	465	3133	843	3206	200	410	38	53	8
860331	14.3389	0	1	0	195	0	0	2	1	7	7	143	143	1333	240	2756	255	18	1	15	1	10	11	9	19	142	141	3009	833	3935	175	27	2	17	2	6	3	64	79	1358	378	3015	844	2680	145	413	24	25	4
861343	14.3557	0	2	3	215	2	1	6	4	2	8	136	122	1363	302	2441	251	23	0	9	7	13	10	29	11	117	152	2892	746	3735	168	20	4	12	3	11	8	54	65	1379	418	2973	761	2367	132	447	20	16	9
862355	14.3726	0	0	0	170	1	0	3	1	4	10	119	95	1239	226	2416	249	35	5	8	0	8	18	40	18	140	141	3029	796	3526	165	18	5	14	5	10	4	57	46	1374	409	2911	663	2478	134	469	23	33	13
863367	14.3895	0	0	5	190	0	1	2	4	6	15	132	113	1314	256	2472	273	21	6	3	3	7	24	16	19	126	159	2952	776	3713	122	26	1	10	4	10	9	51	57	1312	406	2847	642	2307	130	454	18	39	2
864379	14.4063	0	0	0	180	1	1	3	1	10	11	121	139	1409	225	2486	239	29	0	15	0	6	6	18	5	135	182	3045	780	3613	161	36	3	11	4	7	3	50	62	1388	445	2958	697	2567	127	448	20	27	11
865392	14.4232	0	5	2	192	0	2	1	2	9	11	134	116	1446	322	2763	262	28	2	4	2	2	24	25	18	152	179	3112	819	3794	178	24	6	8	8	13	0	78	75	1496	421	3219	760	2576	147	440	28	43	7
866404	14.4401	0	0	0	202	1	8	0	1	1	5	156	107	1499	259	2935	261	29	1	7	1	7	17	28	6	156	193	3167	886	4156	201	21	13	8	6	9	0	55	55	1579	409	3087	828	2944	151	431	23	27	11
867416	14.4569	0	0	0	198	0	3	0	0	2	4	131	104	1477	267	2881	270	22	1	7	4	11	17	17	7	154	215	3219	842	4238	218	21	3	20	0	18	6	71	89	1458	467	3223	890	3028	146	421	30	47	12
868428	14.4738	0	0	2	169	0	0	4	1	2	11	152	126	1458	338	2893	272	31	2	2	0	7	11	20	3	133	205	3175	884	4500	178	26	2	21	0	7	1	71	51	1484	442	3103	837	2984	155	426	42	46	6
869440	14.4907	0	12	4	186	0	2	4	5	3	2	120	122	1407	282	2734	251	35	4	10	2	6	16	15	8	131	207	2990	824	4075	173	23	4	14	4	11	1	54	76	1409	483	3184	810	2824	131	455	45	51	4
870452	14.5075	0	2	0	192	0	1	3	3	2	10	108	142	1412	261	2606	250	26	3	8	0	9	14	27	22	168	155	3029	785	3697	164	23	2	16	5	19	4	62	59	1213	418	2863	807	2534	158	470	51	57	7
871465	14.5244	0	5	0	169	0	1	2	4	4	6	111	109	1341	281	2511	222	31	2	12	0	8	11	28	12	150	156	3022	782	3791	170	17	4	14	6	8	1	52	54	1341	409	2941	749	2615	142	448	47	54	0
872477	14.5413	0	5	0	182	0	0	0	2	2	9	140	112	1445	228	2737	279	23	1	7	0	12	10	26	19	105	191	3045	914	4364	194	38	2	5	5	6	0	46	59	1418	424	3186	782	2877	154	434	23	39	8
873489	14.5581	0	0	1	196	0	0	1	0	3	9	142	118	1477	273	3007	275	23	3	18	3	8	9	28	18	132	196	3328	966	4878	219	35	0	8	3	8	4	69	73	1374	410	3439	893	3265	177	450	47	28	10
874501	14.575	0	5	0	202	0	0	0	1	1	4	141	104	1596	266	2919	285	18	2	6	1	10	17	28	7	161	181	3266	981	4854	217	26	3	19	6	4	3	53	54	1360	431	3387	896	3397	187	474	39	31	4
875513	14.5919	0	8	1	182	0	0	0	2	7	7	116	116	1436	277	2853	251	24	2	3	5	3	7	26	17	129	202	3238	920	4524	220	11	3	15	1	9	6	78	28	1436	389	3228	877	3203	207	498	24	40	4
876526	14.6088	0	11	0	190	0	0	0	7	4	1	130	107	1408	254	2817	243	46	0	7	0	6	14	25	13	142	157	3181	864	4338	192	25	7	12	3	6	5	68	64	1394	484	3171	918	2946	181	457	30	42	14
877538	14.6256	0	8	0	194	0	0	2	4	0	6	144	136	1449	260	2714	252	45	5	15	1	10	8	39	12	143	152	3010	894	4140	173	25	0	9	3	3	4	72	75	1403	391	3102	880	2905	146	432	36	48	5
878550	14.6425	0	5	0	211	0	0	0	3	2	6	111	111	1394	319	2633	264	22	1	5	1	5	13	26	13	154	156	3013	792	4000	192	26	3	18	2	3	1	53	73	1394	401	3166	805	2757	163	476	38	53	15
879562	14.6594	0	9	0	195	0	0	0	0	6	17	136	114	1373	266	2575	242	23	4	7	0	3	9	42	11	142	163	2948	801	3962	153	32	8	14	2	3	1	53	61	1409	393	3142	716	2618	154	414	51	26	5
880574	14.6762	0	0	0	197	0	0	0	0	4	12	118	100	1365	244	2728	257	24	4	14	2	5	5	20	14	114	172	3156	826	4220	177	28	3	14	3	3	8	62	57	1366	432	3304	786	2834	144	531	55	46	5
881586	14.6931	0	6	0	196	0	0	3	2	1	7	143	112	1456	215	3024	265	31	1	3	1	12	5	16	14	135	160	3241	865	4147	218	25	0	22	1	10	4	57	57	1408	465	3279	855	2890	171	433	45	50	6
882599	14.71	0	0	0	195	0	5	1	8	8	8	107	108	1369	248	2820	292	24	0	6	2	9	10	22	8	136	176	3089	824	4052	189	23	2	11	4	14	4	64	50	1460	464	3329	847	2761	161	428	48	22	8
883611	14.7269	0	0	0	177	0	2	0	3	5	6	139	135	1363	277	2689	303	34	1	11	2	6	9	19	25	100	163	3019	815	3799	178	22	1	15	2	7	5	77	59	1315	433	3137	803	2726	138	420	17	57	2
884623	14.7437	0	0	6	198	0	1	0	1	0	16	132	118	1428	239	2621	249	28	1	0	1	10	12	21	9	144	180	3093	793	3819	158	23	0	13	2	7	3	61	55	1342	397	3131	799	2593	157	422	23	63	8
885635	14.7606	0	7	0	198	0	0	1	5	12	6	122	116	1404	258	2615	215	28	1	5	3	12	8	24	21	151	158	3019	827	3745	162	24	7	20	4	6	8	55	89	1434	463	3221	799	2485	134	472	19	46	5
886647	14.7774	0	0	1	176	0	1	1	1	3	12	135	130	1652	235	2567	244	25	0	5	4	7	8	17	19	233	196	3490	851	4031	165	27	9	20	2	4	4	86	80	1863	713	3635	862	2557	110	481	42	45	13
887660	14.7943	0	0	1	189	0	4	0	4	4	8	148	118	1377	272	2463	250	35	0	8	0	6	8	21	16	147	186	3271	780	3741	154	25	8	13	5	14	6	65	72	1686	540	3121	848	2532	155	458	61	44	9
888672	14.8112	0	0	2	178	0	0	0	3	3	7	115	107	1305	258	2604	260	26	0	9	0	9	7	41	3	149	156	3015	841	3810	185	23	6	18	6	10	6	52	68	1475	448	3159	782	2471	138	471	34	53	9
889684	14.8281	0	7	1	184	0	0	3	4	6	6	144	124	1505	264	2807	239	13	0	13	1	4	16	19	7	132	175	3118	871	4236	176	27	1	8	1	11	2	84	70	1507	440	3165	883	2778	159	471	46	33	7
890696	14.8449	0	0	8	197	0	0	0	4	3	6	155	115	1557	307	3242	274	32	6	8	0	8	15	14	20	137	166	3546	1029	5088	227	16	0	9	5	12	3	71	61	1410	487	3389	952	3857	220	452	45	50	0
891708	14.8618	0	2	1	205	0	0	0	3	4	6	129	118	1540	323	3336	268	29	4	5	1	9	15	31	26	188	225	3500	980	5111	244	27	4	16	1	4	2	59	83	1437	468	3416	933	3473	202	453	44	31	2
892720	14.8787	0	11	0	176	1	1	0	4	0	6	122	132	1387	276	2889	289	26	2	3	0	5	14	11	11	149	197	3203	842	4304	171	21	10	13	3	10	6	65	59	1378	453	3229	774	2955	177	448	43	28	7
893733	14.8956	0	7	2	190	0	0	0	4	3	12	122	140	1466	251	2823	259	29	1	7	1	3	10	23	19	127	156	3092	812	4029	170	24	4	15	0	8	1	43	82	1423	427	3246	809	2770	159	456	39	35	5
894745	14.9124	0	8	0	154	1	0	0	3	3	8	116	116	1281	197	2553	211	23	2	7	7	9	8	24	11	108	142	3128	754	3774	158	18	11	13	3	1	3	73	51	1354	446	3016	796	2538	138	462	43	30	8
895757	14.9293	0	4	3	204	0	2	0	0	4	6	133	151	1293	278	2588	270	27	3	14	6	8	10	25	7	132	184	3146	798	3964	183	36	8	15	3	4	4	44	68	1440	437	3153	794	2751	145	446	45	30	12
896769	14.9461	0	1	1	163	3	0	3	2	5	4	124	113	1267	268	2661	260	33	1	8	1	3	18	22	14	111	167	2914	789	3820	181	32	1	14	2	7	4	45	65	1360	445	3200	765	2707	124	495	19	51	8
897781	14.963	0	0	0	188	0	0	2	3	4	9	139	126	1327	258	2694	241	18	1	7	0	5	11	28	21	135	176	2927	788	3968	165	27	2	12	2	5	5	44	66	1271	411	3116	763	2663	161	423	25	58	15
898794	14.9799	0	0	0	166	0	0	0	0	0	10	103	108	1373	265	2657	245	38	3	6	1	8	11	17	9	111	163	3161	803	4032	194	22	6	19	2	10	3	51	64	1320	420	3166	786	2656	149	449	38	41	8
899806	14.9968	0	7	2	209	0	5	2	2	1	3	133	136	1349	243	2715	221	37	2	11	1	6	13	30	6	110	165	3153	861	4125	174	32	0	21	4	12	0	61	77	1378	434	3184	847	2885	141	444	47	44	12
900818	15.0136	0	0	0	200	1	0	1	0	5	12	131	112	1431	277	2957	243	21	1	7	1	3	14	34	13	139	162	3229	844	4324	201	9	0	23	0	6	2	39	73	1442	434	3260	902	2970	161	408	57	48	11
901830	15.0305	0	8	2	188	0	0	0	3	4	6	150	107	1499	305	3034	255	9	0	9	3	1	16	29	13	124	188	3283	1007	4604	208	25	2	18	0	13	2	50	76	1371	465	3320	855	3244	179	500	56	25	1
902842	15.0474	0	7	2	161	0	3	2	7	8	14	130	116	1455	326	3210	292	26	6	3	2	3	14	22	10	142	178	3274	977	4980	221	15	7	8	5	16	0	70	88	1386	453	3209	994	3461	178	413	21	29	7
903854	15.0642	0	3	2	171	0	0	1	4	5	5	120	132	1492	305	3226	271	30	3	9	2	5	10	18	5	159	180	3290	914	4874	202	24	5	18	9	17	3	67	74	1395	423	3334	933	3398	171	489	56	38	9
904867	15.0811	0	0	0	186	0	0	4	1	6	3	135	92	1478	270	2957	226	26	2	4	5	9	15	28	16	137	189	3377	997	4521	208	13	0	13	5	6	6	44	47	1476	475	3270	1037	3260	163	424	56	43	7
905879	15.098	0	0	0	202	7	1	2	1	3	6	109	119	1375	269	2775	248	21	0	8	5	5	15	24	17	121	159	3081	836	4220	170	27	0	11	11	8	8	53	89	1405	440	3302	807	2953	161	452	43	40	5
906891	15.1149	0	7	2	203	0	3	0	9	1	7	136	141	1341	254	2615	247	30	0	3	2	7	7	21	16	138	195	3019	780	4010	154	24	4	12	4	4	4	67	68	1400	366	2994	743	2741	137	414	37	50	15
907903	15.1317	0	0	6	193	0	1	1	6	2	4	127	137	1303	261	2618	249	29	2	1	0	11	7	23	18	134	169	3044	814	4116	155	29	2	17	1	11	8	54	64	1342	441	3035	875	2723	154	464	48	66	15
908915	15.1486	0	0	4	288	2	2	0	1	11	20	93	132	1354	266	2676	222	16	0	4	1	2	14	29	17	119	166	2927	757	3919	185	25	5	9	2	8	4	65	78	1318	413	3029	749	2652	160	442	53	59	7
909928	15.1655	0	9	0	183	0	1	2	0	4	10	106	117	1364	271	2685	263	21	3	8	6	9	10	23	9	109	179	3043	876	4180	177	35	5	18	4	7	0	58	73	1362	410	3143	798	2848	154	510	29	57	15
910940	15.1823	0	8	0	193	0	1	1	2	3	3	130	96	1352	283	2759	298	24	1	7	2	9	8	23	11	135	169	3128	848	4339	210	24	2	15	2	7	8	61	43	1509	465	3252	851	2913	149	425	32	20	6
911952	15.1992	0	0	0	170	0	0	2	0	2	7	123	112	1397	301	2849	286	21	5	7	4	9	22	27	9	138	179	3198	809	4274	214	28	0	9	4	10	2	70	63	1366	409	3148	878	2744	177	438	39	53	5
912964	15.2161	0	2	1	174	0	0	2	2	3	8	115	127	1274	275	2663	269	24	3	2	2	12	22	14	6	129	183	3102	857	4122	210	21	0	15	5	13	0	66	70	1419	458	3170	902	2917	158	472	30	58	18
913976	15.2329	0	0	3	157	0	0	1	1	6	18	147	120	1286	231	2819	242	35	0	3	4	7	19	15	16	144	167	3062	826	4123	179	21	1	11	0	13	6	50	55	1409	413	3170	824	2728	160	490	16	58	10
914989	15.2498	0	0	0	168	0	0	1	5	0	9	128	110	1233	279	2559	246	43	0	5	2	14	15	30	27	143	156	3111	836	3949	210	20	7	18	6	5	2	48	51	1390	442	3153	779	2792	158	441	32	37	7
916001	15.2667	0	16	0	169	0	0	0	1	5	6	145	93	1332	263	2616	270	21	3	4	4	6	10	16	10	127	192	3274	859	3982	167	23	4	16	2	16	5	70	67	1446	422	3188	810	2778	157	470	24	61	5
917013	15.2835	0	18	1	185	1	2	1	8	3	10	134	127	1538	241	2973	259	30	3	15	2	9	16	30	8	195	206	3374	869	4250	202	23	10	14	0	6	10	86	79	1676	565	3675	919	2895	168	479	28	58	8
918025	15.3004	0	5	0	205	0	2	0	3	2	8	154	133	1548	236	2731	300	22	0	9	4	8	7	28	6	170	137	3408	895	4100	202	30	3	19	5	14	1	79	61	1739	586	3744	841	2866	163	473	30	51	8
919037	15.3173	0	14	4	181	0	1	1	5	2	8	140	122	1465	278	2799	307	34	1	4	2	5	7	19	14	179	202	3181	898	4051	202	30	1	20	4	13	8	68	79	1538	425	3442	886	2816	174	414	42	39	10
920049	15.3341	0	2	2	156	2	0	0	0	4	16	103	118	1359	271	2697	261	23	2	7	1	1	10	17	14	151	169	3078	808	4106	195	16	11	12	4	12	7	67	65	1508	477	3242	882	2686	151	476	25	49	14
921062	15.351	0	6	2	196	0	0	0	0	0	12	129	113	1248	270	2539	254	17	2	11	1	2	14	15	13	108	188	3056	926	3879	167	15	7	7	2	12	1	38	77	1408	416	3152	813	2552	138	428	37	60	7
922074	15.3679	0	1	1	177	0	0	0	4	4	4	129	142	1170	227	2459	197	17	5	6	0	2	10	21	20	109	136	2788	783	3728	169	37	5	6	5	3	3	76	54	1347	401	2929	725	2569	152	420	55	23	19
923086	15.3848	0	0	5	164	0	0	0	1	5	15	115	126	1185	247	2427	233	29	3	7	1	6	6	21	13	139	155	2846	757	3675	166	44	3	17	2	10	5	61	48	1288	371	3045	839	2440	153	425	41	59	12
924098	15.4016	0	0	1	227	0	0	5	2	5	9	102	126	1225	243	2599	284	18	4	5	2	6	18	22	7	122	149	2898	755	3723	155	23	1	14	3	14	4	69	72	1311	444	2982	748	2533	165	417	36	54	6
925110	15.4185	0	2	2	176	1	0	1	3	2	19	116	112	1225	223	2453	241	39	0	7	0	8	10	25	18	107	152	2917	783	3412	181	27	3	10	2	6	10	50	53	1373	375	2911	748	2504	128	442	31	29	10
926123	15.4354	0	0	3	196	1	3	0	7	1	7	105	109	1187	207	2512	250	28	0	8	0	7	16	27	16	138	121	2863	747	3587	149	23	3	15	3	8	5	51	52	1325	404	2958	694	2450	130	537	55	50	2
927135	15.4522	0	2	0	176	0	0	1	1	2	14	119	93	1296	226	2615	248	18	3	10	0	9	6	17	19	123	188	3159	811	4040	206	28	1	19	7	9	7	53	50	1380	448	3156	813	2683	140	432	52	44	0
928147	15.4691	0	0	2	182	0	1	0	2	4	10	125	131	1362	315	2787	254	46	0	10	0	2	9	24	17	134	156	3109	852	4397	224	23	5	17	4	10	0	46	64	1387	401	3260	906	3120	183	483	51	40	0
929159	15.486	0	0	0	181	0	0	0	3	2	4	126	112	1456	305	3108	236	16	6	4	1	13	14	23	8	139	169	3141	919	5053	235	25	3	19	4	4	0	58	66	1450	376	3342	882	3461	180	428	25	47	7
930171	15.5029	0	6	0	171	1	0	2	0	5	10	124	134	1374	250	2977	303	20	1	12	3	10	19	26	27	140	167	3076	876	4791	226	25	0	18	2	10	2	46	67	1353	449	3321	832	3201	174	461	33	41	6
931183	15.5197	0	6	0	176	0	0	2	0	1	10	114	129	1401	263	2792	313	24	5	3	1	13	17	27	9	135	182	2948	873	4511	217	24	10	21	2	11	2	63	51	1235	354	3188	826	3228	160	488	28	48	3
932196	15.5366	0	0	0	184	0	5	1	4	9	7	140	141	1469	263	2953	283	20	2	15	0	5	5	26	10	115	178	3078	823	4842	209	14	3	24	5	7	8	35	67	1332	390	3157	951	3276	181	413	33	42	3
933208	15.5535	0	0	0	192	0	0	2	0	1	5	142	140	1357	303	2685	244	33	1	9	2	9	8	21	11	135	188	3023	854	4771	182	18	2	10	3	11	7	60	64	1409	411	3335	880	3186	203	434	45	55	7
934220	15.5703	0	7	3	198	0	0	1	5	5	7	129	109	1274	272	2697	244	24	3	13	5	8	6	32	11	142	170	3048	843	4494	199	24	7	16	2	9	4	61	67	1352	391	3054	860	3051	182	429	45	50	8
935232	15.5872	0	7	2	206	1	1	3	0	7	10	129	114	1284	246	2749	275	21	8	4	0	6	23	23	14	116	181	3024	852	4150	166	13	4	12	1	13	3	63	63	1336	425	3066	788	3020	156	408	29	43	9
936244	15.6041	0	0	1	168	0	1	1	0	3	11	130	114	1315	258	2673	237	19	0	4	1	8	19	28	11	138	150	2818	783	3958	152	17	1	14	2	12	9	64	51	1343	384	3065	732	2679	176	453	37	29	1
937257	15.621	0	8	0	195	1	0	0	3	4	4	109	118	1205	248	2491	226	24	3	13	1	5	12	25	12	105	163	2912	759	3960	172	25	3	25	4	6	8	52	59	1313	436	2884	731	2689	144	437	37	50	8
938269	15.6378	0	0	0	165	0	0	2	1	5	13	100	112	1213	218	2486	257	22	0	6	3	3	11	12	19	130	209	2729	802	3784	178	32	2	7	3	11	5	76	40	1249	462	2926	763	2684	151	422	30	49	7
939281	15.6547	0	0	1	198	0	0	2	3	1	10	102	79	1208	208	2506	220	17	1	7	3	4	11	23	9	121	167	2816	796	3981	155	18	1	18	2	6	7	64	67	1295	408	2884	780	2754	128	435	36	40	4
940293	15.6715	0	3	2	171	0	1	3	2	3	10	119	123	1164	233	2518	269	23	2	8	1	11	12	15	10	159	178	2718	741	3933	188	32	0	7	1	8	0	60	86	1266	394	3080	772	2636	121	457	20	63	7
941305	15.6884	0	3	3	190	0	1	2	1	3	6	134	129	1167	236	2599	243	17	3	9	0	3	9	18	8	128	186	2850	795	3783	199	43	0	18	1	12	9	55	65	1341	366	2928	762	2705	119	439	42	44	2
942317	15.7053	0	5	0	148	2	2	1	3	2	3	128	119	1254	282	2590	244	22	2	9	3	9	14	19	15	109	147	2838	783	3992	169	18	6	12	1	11	5	69	71	1363	395	3067	846	2686	153	458	37	56	8
943330	15.7222	0	5	1	195	0	0	0	5	2	4	86	97	1289	293	2715	287	25	3	9	0	12	9	21	12	116	164	2863	806	4159	217	24	7	14	4	9	3	59	60	1311	394	3063	854	2954	153	432	39	45	14
944342	15.739	0	13	1	182	0	0	1	5	4	5	130	115	1226	228	2625	277	44	2	10	1	11	18	24	7	118	181	2819	758	4128	169	33	4	10	4	5	1	41	64	1251	418	2855	833	2836	153	445	32	55	3
945354	15.7559	0	12	3	177	1	0	0	2	3	7	125	99	1074	233	2635	257	27	2	6	0	5	20	39	15	91	153	2728	774	3812	172	25	3	18	2	8	5	42	77	1224	354	2984	696	2719	144	515	49	52	5
946366	15.7728	0	4	0	188	0	0	0	1	4	7	100	142	1127	227	2398	255	44	0	6	0	9	7	22	19	109	170	2814	822	3868	190	21	5	17	8	13	3	44	64	1316	385	2904	797	2666	152	453	34	47	7
947378	15.7896	0	0	0	140	0	0	0	2	4	10	133	114	1192	211	2431	245	24	0	5	3	14	9	22	12	117	158	2638	692	3612	176	26	5	15	4	4	4	38	41	1215	380	2775	800	2435	138	474	40	39	5
948391	15.8065	0	5	0	178	1	0	0	3	3	4	107	107	1139	242	2387	273	28	0	6	1	5	10	21	12	114	144	2808	736	3621	150	16	8	13	2	19	5	29	63	1234	376	2805	721	2595	143	451	36	46	11
949403	15.8234	0	0	0	182	0	3	0	3	9	6	124	112	1121	188	2391	286	14	10	3	2	7	19	18	8	102	141	2747	734	3642	140	19	0	13	1	10	4	26	50	1214	434	2975	719	2570	139	441	39	48	9
950415	15.8402	0	0	0	167	0	1	0	2	6	8	123	114	1175	252	2443	250	31	2	8	2	3	12	33	7	123	152	2776	748	3825	163	23	4	15	2	3	2	47	63	1297	360	2969	803	2571	157	495	25	31	5
951427	15.8571	0	5	3	156	0	1	1	0	6	7	136	91	1236	253	2425	271	27	2	10	1	5	9	48	10	108	168	2803	737	3823	157	25	0	10	2	8	4	32	62	1225	385	2981	783	2574	113	491	47	21	11
952439	15.874	0	6	0	188	0	1	1	1	16	6	95	124	1118	258	2390	254	33	5	2	0	6	10	25	10	85	165	2634	768	3772	177	28	3	6	5	10	6	30	67	1286	353	2983	774	2558	93	508	56	40	11
953451	15.8909	0	7	1	171	0	3	3	0	5	12	115	111	1201	220	2317	261	20	0	5	0	6	9	23	9	106	170	2754	729	3992	156	27	3	12	5	5	2	39	52	1282	405	2983	707	2562	141	468	26	68	3
954464	15.9077	0	5	0	208	0	0	0	11	2	15	124	130	1172	202	2636	287	32	3	3	3	10	9	20	7	120	153	2679	787	3981	199	28	11	20	0	10	8	28	56	1219	393	2815	740	2757	161	454	38	48	10
955476	15.9246	0	0	1	165	0	3	3	2	3	5	121	121	1155	211	2546	279	33	3	2	4	4	8	27	8	117	168	2857	806	4336	212	23	3	10	2	12	2	18	61	1236	368	3032	787	2997	194	505	51	50	9
956488	15.9415	0	6	1	162	3	1	0	0	2	4	125	99	1264	242	2725	290	30	0	4	1	5	9	20	18	103	143	2923	910	4704	177	22	3	16	2	8	4	32	58	1255	421	3020	857	3278	193	479	41	47	9
957500	15.9583	0	6	3	187	0	3	2	5	4	1	131	111	1319	264	2500	259	43	1	7	2	9	13	18	16	115	135	3041	899	4551	221	21	2	8	4	7	4	50	62	1268	426	3058	783	2972	146	497	40	52	2
958512	15.9752	0	0	0	179	0	0	0	4	2	6	156	114	1349	257	2659	270	44	4	2	3	9	14	25	21	174	153	2964	846	4263	202	14	0	16	3	3	4	64	74	1472	572	3396	856	3030	155	458	24	19	4
959525	15.9921	0	7	0	185	0	0	1	5	11	8	120	121	1344	183	2536	261	25	0	8	0	7	20	27	13	146	171	3045	846	4287	171	31	1	17	3	9	4	60	55	1409	513	3113	784	2886	189	438	27	51	4
960537	16.0089	0	7	1	177	2	1	0	5	4	9	118	131	1214	256	2511	266	24	1	9	2	4	14	15	17	118	135	2751	780	4102	212	19	2	20	6	2	7	55	69	1284	425	3084	770	2780	156	435	32	49	0
961549	16.0258	0	4	3	188	2	0	0	0	7	3	104	96	1169	235	2498	261	27	3	4	1	3	20	28	7	112	173	2820	793	3839	147	14	4	7	7	16	3	59	57	1313	366	2882	770	2616	148	408	29	34	7
962561	16.0427	0	6	0	165	0	3	0	4	5	11	114	120	1184	219	2316	240	26	0	5	0	11	8	22	8	118	134	2597	697	3765	179	21	6	14	3	15	4	68	80	1313	383	2760	754	2625	155	448	23	57	9
963573	16.0596	0	0	0	142	0	1	0	7	3	8	107	125	1236	213	2301	261	34	2	22	1	9	18	20	7	132	152	2805	746	4036	220	25	4	20	6	4	2	46	64	1394	460	3163	817	2586	185	438	46	50	6
964585	16.0764	0	8	0	157	1	0	0	6	1	9	96	153	1262	219	2257	246	32	2	11	1	6	9	29	12	129	130	2885	772	3585	182	19	6	17	0	11	5	46	75	1394	484	3176	755	2413	115	468	43	31	5
965598	16.0933	0	0	3	183	0	0	0	6	9	5	115	121	1160	209	2175	230	33	1	8	2	6	11	21	11	106	173	2635	664	3542	153	27	5	10	5	9	12	27	50	1247	372	2859	722	2355	143	520	36	30	11
966610	16.1102	0	0	2	173	0	0	2	0	0	9	91	104	1006	196	2063	218	22	2	7	2	4	10	21	15	105	119	2465	726	3322	155	25	9	13	1	11	2	46	67	1078	368	2632	691	2304	139	484	24	24	10
967622	16.127	0	0	1	174	0	1	1	1	4	14	123	99	1075	176	2244	223	39	2	10	1	9	11	16	9	106	132	2576	754	3500	165	21	0	14	3	3	12	21	50	1152	361	2708	671	2293	121	427	23	40	5
968634	16.1439	0	0	0	178	0	0	0	6	1	7	110	127	1021	213	2158	237	43	6	4	0	8	17	20	8	101	123	2417	691	3190	125	26	3	10	1	8	6	30	46	1137	317	2615	725	2170	133	482	37	63	7
969646	16.1608	0	2	0	210	1	0	0	2	0	5	135	90	988	197	2004	233	42	4	6	6	10	10	18	11	99	137	2564	724	3295	136	24	0	18	2	7	12	30	24	1095	308	2744	654	2167	115	414	51	53	19
970659	16.1776	0	2	3	225	0	1	4	8	0	4	124	114	1048	208	2114	264	39	2	4	0	6	10	23	8	115	123	2504	666	3350	154	30	3	14	4	6	3	65	47	1153	384	2579	667	2179	125	406	69	49	17
971671	16.1945	0	3	3	177	0	2	3	4	1	14	97	129	978	243	2179	237	30	1	8	0	4	18	25	3	102	138	2619	709	3420	169	22	0	12	0	13	0	54	76	1132	383	2766	629	2310	143	434	51	60	4
972683	16.2114	0	0	3	187	0	1	0	4	1	2	94	76	1136	244	2281	288	40	3	1	2	10	8	27	12	102	152	2451	723	3713	171	10	2	22	3	2	5	43	64	1126	340	2810	713	2449	159	460	50	58	4
973695	16.2282	0	10	2	157	0	3	0	4	2	13	111	111	1195	265	2637	291	34	0	6	0	3	11	19	20	115	156	2781	869	4248	225	7	1	11	4	12	8	29	51	1153	404	2816	725	2956	152	457	41	43	8
974707	16.2451	0	6	0	166	0	1	0	4	7	2	125	110	1278	217	2563	280	17	1	8	1	2	23	24	17	107	171	2812	771	4197	212	21	0	18	8	7	6	44	71	1228	385	2878	761	2950	153	482	62	37	12
975719	16.262	0	6	0	179	0	1	0	3	2	4	121	96	1199	217	2535	290	29	0	6	0	12	12	16	25	89	118	2598	755	3931	181	27	5	15	2	7	0	45	62	1178	354	2858	721	2852	147	515	46	61	4
976732	16.2789	0	5	0	173	0	0	2	4	1	6	115	117	1023	258	2434	239	31	5	6	3	7	9	21	14	106	120	2551	768	3917	194	25	4	16	2	14	11	43	66	1217	387	2913	723	2688	153	446	52	68	3
977744	16.2957	0	0	0	164	0	0	1	5	2	12	107	117	1113	265	2404	260	20	1	7	1	4	8	28	6	99	133	2625	798	3921	210	18	5	12	0	9	4	47	47	1126	343	2813	712	2757	155	419	54	52	8
978756	16.3126	0	0	0	167	0	2	2	0	8	5	84	117	1097	228	2318	248	22	5	9	0	5	9	21	7	111	116	2589	831	4101	161	22	1	10	3	6	7	46	65	1265	314	2583	727	2665	167	480	43	44	11
979768	16.3295	0	4	2	170	0	3	0	4	9	11	106	94	1092	246	2473	234	19	1	5	0	4	12	20	9	105	127	2752	834	4054	195	15	1	10	0	8	2	43	67	1155	357	2863	792	2977	155	418	47	15	5
980780	16.3463	0	8	0	143	0	0	0	3	7	5	110	135	1104	234	2435	254	24	0	7	3	8	15	20	8	99	152	2700	814	4357	191	39	4	16	5	9	7	50	73	1129	388	2913	835	3032	157	458	35	20	8
981793	16.3632	0	0	0	148	1	0	2	3	2	8	127	130	1125	246	2384	256	38	4	2	1	9	14	25	10	94	139	2605	838	4221	187	37	4	15	5	12	7	42	47	1147	380	2800	834	2815	150	482	23	24	10
982805	16.3801	0	0	2	154	0	1	1	5	4	2	94	127	1073	208	2400	265	38	2	9	3	6	12	24	10	99	134	2505	780	3912	184	24	2	18	5	8	4	33	52	1105	343	2626	721	2759	163	460	26	53	9
983817	16.397	0	0	2	163	0	6	3	0	7	14	106	101	1011	205	2309	264	40	0	7	6	5	11	32	13	103	131	2506	699	3730	152	14	2	14	4	15	8	27	54	1068	343	2539	711	2510	137	469	31	55	11
984829	16.4138	0	0	0	164	0	0	0	1	0	13	96	117	982	204	2173	272	40	1	13	0	10	7	17	15	100	111	2387	674	3586	194	25	0	8	0	8	3	53	47	1051	314	2690	702	2508	134	428	21	38	17
985841	16.4307	0	0	0	143	0	0	0	1	0	8	108	105	1043	214	2171	236	27	1	10	3	6	17	22	10	104	127	2376	701	3603	166	22	0	19	3	11	0	58	52	1120	354	2751	650	2278	150	503	30	48	10
986853	16.4475	0	0	0	178	0	0	3	1	4	10	94	133	962	166	2112	240	28	2	5	1	5	17	21	9	110	137	2293	662	3336	156	24	2	18	5	9	6	49	23	992	296	2437	625	2316	138	462	30	63	7
987866	16.4644	0	17	0	153	1	0	0	0	10	15	107	111	1027	224	2171	244	20	2	5	3	7	10	25	16	75	124	2357	639	3344	155	43	0	9	5	4	4	40	28	1171	323	2467	642	2207	139	456	26	52	8
988878	16.4813	0	0	0	167	0	0	0	2	0	7	122	113	975	182	2179	262	31	3	7	0	8	12	29	19	72	118	2285	619	3267	159	34	9	7	2	4	4	37	55	1103	317	2435	694	2308	123	452	48	39	7
989890	16.4982	0	4	0	158	4	1	1	2	4	12	113	120	1015	200	2207	272	26	1	7	1	8	9	22	9	96	126	2443	704	3506	165	26	0	8	5	11	4	23	62	1060	348	2530	615	2410	133	455	47	45	3
990902	16.515	0	4	3	187	1	0	0	1	3	16	84	129	941	186	2108	233	33	1	14	0	2	6	20	14	89	147	2492	631	3383	138	28	5	25	6	10	5	21	43	1130	333	2499	665	2530	132	472	34	52	8
991914	16.5319	0	11	7	192	0	0	1	2	1	4	91	124	966	197	2153	237	25	1	8	1	5	11	24	13	102	137	2315	600	3281	152	26	3	12	7	3	3	39	52	1005	327	2526	682	2300	104	457	40	42	3
992927	16.5488	0	0	1	219	0	0	0	6	8	9	104	105	960	197	2080	221	31	2	3	2	7	15	29	14	115	142	2349	650	3206	141	25	1	13	0	14	9	44	50	1115	346	2541	683	2290	137	483	39	27	1
993939	16.5657	0	0	0	184	4	0	1	0	1	14	93	92	865	219	2057	206	15	8	1	2	5	14	30	15	68	143	2226	631	3140	131	34	3	20	4	13	4	20	57	1073	318	2506	678	2285	119	421	25	43	5
994951	16.5825	0	0	2	157	0	1	0	0	2	6	100	105	1020	192	2005	239	23	0	6	0	14	20	20	7	94	97	2355	661	3161	156	14	6	17	6	3	2	50	50	1125	368	2443	611	2118	110	459	27	56	3
995963	16.5994	0	5	0	178	0	0	1	1	0	10	87	116	1002	183	2114	230	33	5	6	1	11	8	24	15	99	136	2422	638	3398	163	22	4	14	7	4	4	66	37	1180	386	2573	641	2279	113	516	35	37	7
996975	16.6163	0	11	0	180	1	0	0	2	4	13	95	139	947	199	2028	295	41	3	5	5	1	13	27	14	106	123	2268	714	3227	164	29	2	10	2	14	4	56	34	1135	359	2516	659	2230	102	428	56	55	5
997987	16.6331	0	0	4	190	0	1	0	2	2	5	116	128	924	177	1921	209	64	0	4	0	3	23	20	11	97	130	2242	645	3257	144	23	3	19	3	7	7	43	43	1122	343	2458	641	2207	136	456	48	49	5
999000	16.65	0	6	1	176	0	0	0	7	8	9	90	109	992	164	2089	235	34	0	6	1	8	20	28	12	72	112	2247	653	3166	113	21	2	8	2	5	12	25	40	975	329	2408	620	2164	125	482	52	47	12
1000012	16.6669	0	0	1	218	0	1	0	1	2	13	87	115	889	197	2028	240	23	7	6	3	6	11	35	17	88	129	2263	643	3207	157	28	1	19	8	5	7	21	44	972	289	2460	594	2134	118	485	39	52	7
1001024	16.6837	0	3	0	171	0	2	0	4	6	5	77	123	922	184	1937	248	19	1	5	0	12	4	26	8	103	101	2254	551	3005	136	24	3	14	6	9	3	30	49	971	295	2314	676	2104	130	458	22	63	7
1002036	16.7006	0	4	3	198	0	1	1	0	7	2	115	117	900	177	1949	202	26	4	9	1	8	16	27	16	105	99	2158	614	3050	122	31	6	11	5	1	0	42	30	1008	289	2223	583	2057	125	484	29	47	11
1003048	16.7175	0	0	2	174	0	2	0	5	10	8	97	102	895	183	1871	236	22	4	8	0	12	10	19	7	87	113	2085	603	2935	182	40	0	12	1	9	3	27	29	1021	314	2347	632	2004	99	495	41	64	6
1004061	16.7343	0	0	1	182	0	0	0	5	6	9	105	125	927	160	1988	228	45	2	8	1	3	10	29	8	95	121	2282	614	3128	137	22	4	11	4	11	2	35	44	1094	325	2566	615	2173	134	425	49	57	3
1005073	16.7512	0	6	0	163	0	0	1	2	1	10	86	115	959	233	2077	230	44	0	7	3	2	7	17	10	100	152	2135	605	3279	152	23	4	8	3	10	1	47	56	1085	359	2670	673	2284	113	488	30	21	3
1006085	16.7681	0	0	0	161	1	1	3	4	9	11	107	107	1025	197	2184	238	30	1	3	3	14	8	26	15	79	115	2270	648	3451	157	22	1	9	3	7	2	56	53	1095	334	2566	692	2540	146	446	40	12	0
1007097	16.7849	0	6	0	207	1	3	0	0	1	6	106	106	1048	203	2224	237	22	3	11	5	3	11	23	9	93	129	2425	689	3872	170	28	4	9	8	8	2	49	56	1042	355	2601	680	2846	153	461	43	22	12
1008109	16.8018	0	0	0	166	0	2	0	7	4	13	94	107	1095	201	2365	267	18	7	8	0	3	12	16	12	99	134	2495	747	4044	178	26	4	7	2	3	1	48	45	1064	307	2674	819	3089	168	480	32	41	6
1009121	16.8187	0	0	2	188	1	0	1	3	8	14	103	116	1127	232	2570	304	22	0	8	0	13	17	25	10	88	130	2405	834	4580	180	27	4	23	4	4	5	46	15	1026	345	2711	828	3443	211	485	24	39	8
1010134	16.8356	0	1	0	166	0	1	0	3	8	11	98	114	1129	201	2609	270	21	0	14	2	6	17	20	12	88	166	2543	823	4715	191	23	2	16	2	5	2	40	34	1094	380	2737	830	3604	162	404	45	39	14
1011146	16.8524	0	0	0	192	0	0	1	4	7	13	115	137	1097	221	2476	245	35	3	8	2	6	11	15	14	87	157	2507	845	4620	187	33	0	20	5	3	4	35	35	972	350	2652	718	3280	180	469	39	38	9
1012158	16.8693	0	8	0	171	0	1	0	10	2	6	95	112	1048	207	2257	263	38	2	6	0	11	20	26	12	95	148	2299	755	4219	161	23	2	17	4	5	6	32	20	1045	315	2511	722	3026	205	486	27	49	10
1013170	16.8862	0	8	0	193	1	0	1	5	4	14	96	109	1011	183	2231	255	33	1	0	0	2	8	14	11	77	120	2190	724	3881	179	18	1	7	3	5	2	33	31	962	309	2633	784	2829	153	465	22	63	2
1014182	16.903	0	2	4	177	0	1	2	2	5	10	90	132	951	204	1957	238	26	1	6	5	8	9	21	7	98	129	2173	657	3670	151	33	0	20	0	9	5	26	29	1030	302	2350	727	2436	124	441	45	56	13
1015195	16.9199	0	4	1	185	0	1	0	2	8	19	104	113	913	199	1986	218	32	1	8	0	5	6	23	6	93	132	2168	654	3246	137	15	2	17	4	4	3	36	45	1014	321	2244	664	2383	102	491	36	42	2
1016207	16.9368	0	4	1	179	0	1	0	8	4	12	98	125	891	205	1931	212	31	1	7	5	6	9	17	11	106	111	2206	552	3128	135	20	0	15	8	11	6	19	36	968	266	2229	620	2211	112	452	40	41	7
1017219	16.9536	0	0	0	158	0	3	0	2	2	8	78	86	909	168	1844	243	33	3	5	2	10	17	27	19	60	139	2138	629	3124	129	30	2	12	10	6	4	27	19	976	314	2333	595	2138	132	475	52	50	12
1018231	16.9705	0	8	1	168	1	0	1	2	6	8	73	106	861	144	1671	217	44	5	4	1	6	17	29	15	85	145	1943	636	2731	131	19	6	9	6	5	2	35	41	952	281	2380	552	2129	113	486	56	68	8
1019243	16.9874	0	3	6	176	0	1	2	4	9	2	99	96	883	181	1672	224	33	2	7	1	5	27	19	7	93	129	1950	540	2969	121	18	0	4	3	3	4	43	45	1035	257	2236	599	1956	118	504	36	50	1
1020255	17.0042	0	3	1	172	0	1	1	4	2	9	98	109	870	180	1705	213	21	6	5	0	7	14	19	9	78	103	1947	509	2853	137	20	3	17	2	8	5	27	46	974	298	2187	579	1857	132	432	26	41	4
1021268	17.0211	0	0	0	200	1	0	1	1	2	5	89	95	856	176	1780	252	45	1	7	2	6	15	21	12	68	106	1869	555	2857	157	20	1	5	2	5	3	29	38	1003	249	2187	558	1969	141	459	46	29	2
1022280	17.038	0	0	3	154	1	0	0	3	4	4	96	119	792	134	1846	211	39	9	17	0	6	15	18	12	93	121	2092	558	3052	109	18	0	10	7	10	4	18	43	968	306	2294	589	1941	103	467	53	45	7
1023292	17.0549	0	1	3	187	0	3	0	3	4	7	89	92	830	179	1683	254	23	2	6	0	1	12	20	0	60	118	2000	609	2901	156	14	5	13	2	12	3	38	57	990	292	2160	593	1966	84	496	47	58	10
1024304	17.0717	0	2	1	170	1	0	7	0	3	12	75	103	830	160	1836	219	24	4	7	0	5	12	18	9	91	114	2130	574	3013	144	29	5	14	3	0	3	51	58	897	272	2263	524	1891	99	523	42	45	10
1025316	17.0886	0	0	1	180	1	0	2	2	6	3	79	112	819	183	1809	247	33	4	3	3	3	7	17	8	79	103	2116	588	3164	138	32	0	9	5	4	1	49	51	927	292	2226	627	2076	140	452	38	38	4
1026329	17.1055	0	0	0	276	0	0	0	1	1	3	110	113	826	140	1922	240	22	3	6	1	2	10	23	7	87	122	2053	531	3145	144	24	2	15	3	12	3	31	47	955	291	2264	570	2080	118	453	23	47	8
1027341	17.1224	0	3	1	205	0	1	0	4	3	8	112	105	888	208	2047	231	47	2	14	1	2	5	36	14	75	133	2125	640	3163	159	17	1	12	1	6	9	31	50	1011	315	2157	601	2275	142	516	36	26	7
1028353	17.1392	0	5	2	176	0	0	1	1	3	13	88	121	904	161	1955	245	45	0	3	0	6	15	22	16	105	97	2204	608	3296	158	21	3	17	1	1	4	22	63	935	335	2121	622	2285	119	498	53	38	6
1029365	17.1561	0	0	3	180	2	0	3	2	3	4	78	114	817	146	1797	223	42	3	8	4	3	7	19	13	84	121	1956	539	3059	148	44	1	18	2	4	1	35	50	848	251	2242	568	2141	122	462	39	48	13
1030377	17.173	0	0	1	185	0	0	0	1	2	7	99	120	777	146	1782	225	30	1	10	0	4	13	29	13	78	91	1970	595	2849	131	41	3	16	5	9	6	24	50	800	234	2095	533	2012	134	443	25	38	15
1031389	17.1898	0	1	3	190	0	0	4	0	5	7	81	98	847	163	1663	282	30	2	4	0	5	20	26	6	60	116	1917	578	2909	135	25	1	7	2	13	5	28	53	767	252	2035	551	1906	103	502	24	59	20
1032402	17.2067	0	0	1	201	0	0	4	5	3	10	101	98	844	170	1582	229	40	1	10	2	7	20	18	6	76	123	1888	563	2669	132	27	3	9	2	8	0	30	34	826	237	2117	551	2017	119	505	36	62	3
1033414	17.2236	0	0	1	186	1	0	0	1	4	8	82	134	770	154	1630	235	42	3	10	2	7	14	20	10	54	98	1860	513	2712	120	24	2	9	1	2	8	26	23	890	279	2017	537	1900	119	405	22	71	10
1034426	17.2404	0	6	0	175	0	0	2	4	1	10	83	91	825	178	1654	259	27	4	5	6	12	11	13	16	59	100	2007	584	2853	113	29	6	9	1	12	6	36	23	908	299	2011	575	2015	126	489	37	49	7
1035438	17.2573	0	1	0	190	0	0	2	5	7	5	97	94	742	182	1813	224	26	3	6	2	8	12	26	12	79	109	1914	544	2945	155	16	3	12	4	3	7	33	26	946	290	2144	528	1981	82	449	41	37	3
1036450	17.2742	0	0	0	193	0	0	3	1	4	11	79	81	779	144	1734	224	28	6	11	2	3	9	24	5	94	108	2022	540	2813	164	23	2	11	3	2	8	42	20	868	239	2141	546	2039	117	524	49	27	11
1037463	17.291	0	8	1	185	0	0	3	1	6	10	67	108	756	145	1664	243	26	0	7	8	6	8	12	9	87	89	1852	524	2759	120	25	2	28	3	14	1	21	24	858	234	1952	485	1849	68	519	33	24	15
1038475	17.3079	0	3	0	188	0	1	2	2	1	14	76	85	765	144	1603	233	16	2	12	3	8	8	18	13	73	93	1823	483	2639	144	20	3	16	4	10	3	29	26	802	248	1967	505	1816	91	459	31	24	5
1039487	17.3248	0	0	1	194	0	0	0	2	4	12	81	131	764	151	1566	235	14	2	20	3	7	10	21	10	75	95	1744	500	2695	123	22	2	22	1	4	4	22	12	808	292	1976	510	1910	96	459	29	28	13
1040499	17.3417	0	1	1	188	0	0	0	1	0	9	100	133	736	176	1701	224	32	1	7	3	10	8	18	11	72	101	1817	516	2645	122	21	1	18	5	5	3	48	31	822	285	1955	482	1799	93	472	24	39	4
1041511	17.3585	0	8	0	206	1	1	0	4	6	10	78	101	783	164	1636	253	41	4	9	5	7	16	24	14	69	109	1951	516	2645	140	30	1	11	2	6	0	25	42	886	258	1985	523	1761	83	484	39	34	11
1042523	17.3754	0	0	1	196	0	2	1	6	6	19	80	76	751	150	1676	255	52	9	5	2	6	11	21	11	67	130	1801	541	2627	149	27	14	14	0	8	5	40	27	824	246	1969	486	1829	108	483	43	31	7
1043536	17.3923	0	0	2	166	0	2	0	0	0	5	85	112	697	155	1751	243	39	1	3	1	5	15	25	14	66	99	1984	529	2772	131	33	1	16	0	11	9	31	27	876	261	1980	500	1930	106	521	29	38	5
1044548	17.4091	0	0	0	149	0	1	0	1	5	9	87	103	787	160	1616	210	46	2	8	1	10	12	21	6	82	96	1857	495	2770	121	24	2	11	2	2	1	31	29	849	277	1950	530	1730	104	516	20	41	12
1045560	17.426	0	0	0	194	0	0	1	7	2	6	77	119	750	166	1764	275	23	0	7	2	9	12	21	14	84	119	1856	544	2760	116	23	0	10	3	4	11	24	43	846	246	1998	563	1794	118	484	21	42	4
1046572	17.4429	0	6	0	181	0	1	0	1	3	6	89	79	754	164	1643	238	30	0	12	2	11	16	18	8	85	87	1764	524	2789	123	31	3	14	4	7	6	17	40	831	314	2070	529	1878	96	458	25	44	6
1047584	17.4597	0	0	4	173	0	0	0	2	4	10	89	126	781	165	1681	273	25	2	2	3	8	8	21	9	78	100	1768	554	2676	112	21	4	14	1	8	10	16	33	913	311	2049	465	1780	100	447	37	50	7
1048597	17.4766	0	2	0	174	0	1	0	3	0	8	105	109	768	140	1628	204	30	1	2	1	7	11	24	8	62	92	1782	525	2808	118	17	7	18	3	9	2	33	51	937	272	2036	519	1963	110	463	58	64	10
1049609	17.4935	0	3	1	174	0	0	1	2	5	7	69	100	781	120	1582	196	19	0	2	5	8	12	25	8	51	100	1823	530	2615	100	23	4	12	3	5	4	29	37	789	258	1965	489	1725	97	475	44	48	11
1050621	17.5103	0	0	0	173	0	1	0	1	9	6	87	100	739	130	1517	250	27	3	8	1	5	19	25	14	73	117	1803	498	2564	114	28	3	15	5	9	1	30	23	829	301	1913	468	1670	97	531	50	58	13
1051633	17.5272	0	0	4	206	0	1	0	4	12	4	61	112	738	176	1512	234	28	0	6	2	8	7	20	9	67	101	1750	529	2513	114	33	9	10	3	8	4	21	21	795	277	1896	421	1753	108	468	57	58	8
1052645	17.5441	0	4	1	219	1	0	0	4	9	12	88	101	679	169	1529	213	31	0	2	1	6	10	25	18	60	112	1682	482	2515	136	22	1	17	1	6	0	20	18	805	251	1910	505	1658	98	456	54	59	9
1053657	17.5609	0	7	0	177	0	4	0	0	4	4	67	95	730	141	1547	197	22	2	10	0	7	22	13	17	77	100	1691	483	2582	94	18	1	18	3	21	17	16	26	817	251	1996	496	1740	107	481	31	46	3
1054670	17.5778	0	3	0	173	0	1	0	1	4	1	67	89	736	134	1604	212	25	0	6	2	2	11	27	9	88	111	1723	477	2607	118	27	2	16	5	27	5	23	31	773	239	1882	506	1899	97	496	40	64	4
1055682	17.5947	0	0	0	195	0	0	0	1	6	2	71	84	826	120	1588	221	23	4	9	1	3	13	15	12	71	107	1710	545	2587	106	20	2	14	5	14	7	31	23	782	280	1988	510	1947	117	428	49	44	10
1056694	17.6116	0	5	2	162	0	1	1	3	6	9	85	92	706	139	1512	231	41	0	5	3	8	11	28	10	75	101	1599	467	2690	121	18	0	13	1	5	2	37	25	786	297	1912	476	1856	104	460	45	44	13
1057706	17.6284	0	0	4	195	1	1	0	1	2	20	62	107	707	180	1564	227	24	4	4	2	6	14	16	17	67	102	1765	516	2667	126	24	6	15	5	7	2	23	24	807	208	1993	500	1799	122	469	28	55	2
1058718	17.6453	0	1	2	198	0	1	0	5	1	15	79	112	700	167	1472	228	30	4	14	2	6	20	15	19	83	87	1794	509	2489	140	42	4	14	1	5	4	30	35	773	184	1909	468	1826	88	460	34	26	5
1059731	17.6622	0	0	0	174	0	0	1	5	0	5	81	117	691	159	1451	208	25	6	4	0	12	6	23	11	67	108	1587	491	2522	127	20	2	12	3	22	4	39	35	747	259	1905	503	1802	104	462	26	49	10
1060743	17.6791	0	1	0	154	0	0	2	5	0	5	96	89	673	121	1490	226	27	1	10	1	7	20	19	7	68	91	1672	473	2538	115	17	0	18	10	4	6	49	53	783	217	1892	526	1751	74	482	27	57	19
1061755	17.6959	0	6	0	168	2	0	0	1	3	7	99	93	708	151	1532	220	26	0	8	0	9	9	25	17	72	91	1752	473	2389	121	21	1	17	1	18	15	27	22	824	230	1964	504	1779	95	472	26	50	3
1062767	17.7128	0	0	1	183	0	4	2	0	1	8	100	123	680	150	1489	222	26	3	5	1	3	12	24	11	54	96	1686	461	2438	97	36	1	19	1	8	4	29	33	851	275	1989	440	1604	99	473	44	38	7
1063779	17.7296	0	0	0	200	0	5	2	1	4	1	69	106	732	124	1575	237	33	1	6	1	4	14	21	14	61	89	1781	444	2329	88	33	7	14	3	5	5	31	8	860	234	1938	503	1698	87	497	36	25	6
1064791	17.7465	0	7	1	200	0	0	0	2	3	1	75	106	665	130	1396	231	12	1	9	5	7	11	25	11	83	73	1679	471	2324	111	29	3	21	2	8	4	22	30	840	232	1716	434	1738	107	486	31	53	5
1065804	17.7634	0	2	2	157	1	0	1	0	7	7	61	93	640	158	1511	218	20	5	9	1	7	19	19	9	70	124	1690	494	2487	106	25	0	14	6	4	8	25	42	764	267	1897	480	1707	96	500	47	42	13
1066816	17.7803	0	0	0	195	0	0	0	1	5	8	76	101	676	162	1366	214	32	6	4	0	2	13	17	18	49	82	1714	475	2369	121	27	0	11	0	4	8	25	23	658	211	1750	487	1778	104	451	64	40	14
1067828	17.7971	0	0	0	169	0	0	0	2	4	4	78	110	667	125	1502	230	37	5	5	0	7	9	36	16	52	83	1612	467	2627	131	18	2	17	1	10	2	22	27	748	223	1857	453	1789	103	457	27	49	9
1068840	17.814	0	0	0	183	0	0	1	2	3	6	82	109	684	164	1624	239	33	0	2	3	4	17	16	12	66	103	1771	532	2871	136	22	11	14	5	12	9	27	42	725	234	1879	583	1986	108	445	31	46	5
1069852	17.8309	0	2	0	183	0	0	0	0	5	10	79	110	663	163	1647	219	18	0	3	1	8	9	24	12	70	95	1716	551	2916	141	25	4	7	2	6	6	21	31	804	264	1936	548	2097	115	500	42	40	9
1070865	17.8478	0	0	0	161	0	0	3	0	4	12	100	91	688	139	1761	226	25	0	12	0	13	11	21	11	63	110	1742	600	3076	145	11	3	10	0	5	0	23	34	762	237	1822	604	2240	119	479	47	48	7
1071877	17.8646	0	4	0	171	1	1	0	3	1	8	78	117	777	149	1696	256	23	0	5	3	1	11	14	17	62	92	1824	556	3081	159	20	1	13	7	9	9	33	20	796	271	1924	561	2314	143	477	72	47	6
1072889	17.8815	0	0	2	189	1	1	0	5	4	10	83	96	706	127	1675	243	25	3	12	5	5	15	12	12	71	99	1795	645	3197	155	19	2	9	1	8	4	33	26	705	245	1961	552	2347	131	470	36	52	10
1073901	17.8984	0	1	3	181	0	0	0	0	4	13	99	104	759	174	1711	232	32	2	9	0	8	4	24	7	61	95	1893	621	3334	125	21	2	15	6	5	0	21	31	783	220	2013	660	2468	133	437	26	61	7
1074913	17.9152	0	4	2	172	0	1	2	0	1	7	77	112	734	171	1772	291	29	0	3	2	3	6	21	4	61	109	1865	615	3207	135	24	3	11	4	4	4	24	27	770	247	2005	663	2398	105	445	35	51	4
1075925	17.9321	0	1	3	183	0	0	0	4	5	6	76	105	837	144	1765	229	49	2	5	5	6	13	21	7	77	77	1755	581	3340	150	36	2	20	0	7	1	42	47	851	253	2048	577	2375	126	483	23	32	14
1076938	17.949	0	3	2	175	0	0	0	1	2	12	86	98	771	165	1698	223	39	1	7	1	4	8	22	9	70	97	1900	576	3054	132	33	3	14	2	11	0	18	27	757	248	1999	557	2321	137	521	35	37	4
1077950	17.9658	0	0	2	193	0	1	0	1	8	6	71	78	670	143	1588	205	40	3	8	1	6	10	21	12	78	97	1699	501	2910	104	33	2	18	1	7	8	17	14	737	254	1984	545	2086	107	477	48	49	5
1078962	17.9827	0	9	0	168	0	1	0	0	2	15	75	113	701	140	1463	228	39	0	15	1	8	15	16	9	70	87	1705	543	2643	129	27	8	14	4	12	8	26	33	728	225	1767	510	1958	107	436	31	28	6
1079974	17.9996	0	0	0	178	1	2	0	5	9	12	82	96	680	146	1428	224	39	6	9	2	6	19	22	12	62	99	1680	497	2538	114	29	3	17	2	7	4	27	25	669	238	1726	494	1808	86	532	19	20	14
1080986	18.0164	0	1	5	185	0	2	1	3	10	6	101	91	649	110	1411	193	28	2	3	4	12	26	28	7	74	83	1579	463	2423	118	28	4	10	2	12	2	29	24	711	233	1794	427	1704	86	451	24	52	9
1081999	18.0333	0	3	0	171	0	4	0	1	3	8	89	111	595	128	1408	205	23	0	11	1	3	11	28	7	56	99	1551	467	2206	87	24	0	10	3	6	3	23	23	724	212	1729	436	1664	99	471	40	68	5
1083011	18.0502	0	2	0	167	3	0	0	2	8	0	81	101	598	98	1435	213	25	4	6	0	7	16	19	18	64	86	1577	404	2255	96	24	1	12	4	7	4	32	31	766	198	1657	488	1572	102	490	49	37	1
1084023	18.067	0	3	1	189	0	1	2	3	9	6	60	102	557	125	1367	217	24	0	6	2	2	12	16	14	76	106	1420	463	2247	94	24	1	12	3	7	4	28	7	772	222	1575	413	1548	87	450	35	45	10
1085035	18.0839	0	0	2	186	0	1	3	5	1	13	83	101	625	132	1273	233	17	13	5	0	5	13	30	15	57	85	1449	446	2296	90	23	3	12	3	6	6	22	24	715	200	1668	419	1587	94	510	25	56	5
1086047	18.1008	0	0	0	182	0	0	1	1	4	7	77	99	585	104	1362	216	31	4	4	1	10	12	35	13	67	66	1556	415	2188	69	14	2	13	5	5	3	16	18	648	186	1672	421	1535	83	471	36	45	6
1087059	18.1177	0	6	1	178	0	0	2	0	3	2	67	117	631	150	1323	207	22	4	6	4	10	13	24	9	65	81	1465	458	2119	99	18	1	14	5	10	3	21	31	666	167	1545	407	1476	78	484	42	34	6
1088072	18.1345	0	0	1	175	0	0	0	0	4	4	83	86	623	96	1333	200	24	2	6	2	5	13	20	19	55	86	1466	406	2073	90	16	2	14	6	8	1	23	21	657	194	1657	405	1467	74	450	51	23	5
1089084	18.1514	0	0	0	176	0	1	2	1	1	6	73	101	590	122	1196	203	37	3	8	1	3	12	27	13	49	110	1372	396	2135	110	20	7	14	7	6	9	27	22	679	218	1616	407	1519	86	501	51	22	8
1090096	18.1683	0	4	3	204	0	0	1	2	4	7	73	118	558	126	1269	243	44	3	14	0	6	21	16	15	49	89	1463	411	2226	117	22	0	10	2	10	5	22	25	646	211	1657	419	1586	105	470	26	30	6
1091108	18.1851	0	0	2	181	0	0	0	0	4	7	59	122	611	124	1438	231	22	10	7	3	3	9	21	12	29	81	1584	410	2289	105	33	3	6	5	7	5	21	18	647	193	1576	422	1614	109	480	30	28	5
1092120	18.202	0	0	3	175	2	1	1	2	5	9	70	132	577	153	1325	253	13	0	4	0	12	8	20	12	37	91	1436	474	2347	113	25	10	13	1	10	4	25	20	714	188	1542	453	1461	91	528	44	57	16
1093133	18.2189	0	4	3	159	0	2	0	0	4	6	91	102	570	136	1301	220	23	1	8	2	1	20	19	15	42	86	1402	455	2264	109	19	2	15	2	4	3	22	18	697	165	1679	429	1555	84	492	39	53	17
1094145	18.2357	0	3	1	196	0	2	0	5	7	3	79	94	629	123	1312	226	42	0	8	0	7	22	16	20	32	77	1432	436	2259	104	21	1	10	1	3	6	23	28	689	245	1663	392	1570	89	438	37	60	4
1095157	18.2526	0	1	3	178	1	2	0	2	13	11	73	88	586	125	1268	237	30	2	10	2	6	14	18	6	49	65	1462	404	2072	98	19	4	16	2	13	2	34	29	678	205	1634	373	1504	83	493	46	47	3
1096169	18.2695	0	0	2	202	0	1	0	0	1	8	64	98	553	140	1313	178	32	8	9	0	12	12	20	7	50	85	1402	383	2155	89	19	2	11	4	3	6	27	13	680	201	1673	377	1527	89	465	52	27	2
1097181	18.2863	0	3	3	185	0	0	2	1	4	11	70	99	545	110	1240	246	27	2	5	1	8	9	13	9	64	88	1451	418	2053	89	45	1	7	2	5	0	15	26	702	208	1576	420	1456	73	511	40	19	8
1098193	18.3032	0	1	2	196	0	1	0	1	6	4	71	108	511	124	1241	233	29	5	8	4	5	7	20	10	44	85	1406	386	2068	102	22	1	13	0	6	4	21	25	629	212	1613	403	1416	80	496	57	32	6
1099206	18.3201	0	2	0	162	0	1	3	2	2	4	54	119	583	119	1294	224	21	0	13	4	10	19	22	10	55	71	1415	397	1928	84	26	0	20	2	8	2	25	21	632	233	1515	333	1404	80	424	65	43	10
1100218	18.337	0	0	5	174	0	3	0	0	1	11	70	97	529	111	1168	202	34	2	2	1	3	7	14	3	59	54	1409	402	1988	116	23	2	19	2	6	9	22	24	659	217	1585	380	1383	62	485	24	51	6
1101230	18.3538	0	6	0	192	0	2	0	5	4	8	82	93	615	122	1226	223	17	4	5	3	13	3	22	11	60	103	1366	422	1935	92	27	0	6	8	8	7	23	26	695	191	1510	412	1390	65	473	43	45	8
1102242	18.3707	0	0	0	203	0	0	2	2	3	9	82	103	536	124	1183	251	33	0	9	2	8	12	20	6	58	74	1375	355	1841	81	30	1	11	1	12	3	20	19	637	187	1585	432	1301	76	519	48	37	5
1103254	18.3876	0	0	6	199	0	1	2	0	0	8	82	105	521	96	1128	220	34	10	6	2	6	14	12	4	39	107	1355	420	1928	105	26	0	10	2	7	2	23	29	616	185	1579	360	1298	71	524	36	49	4
1104267	18.4045	0	2	7	180	0	1	1	0	2	15	68	87	571	118	1051	201	46	2	8	2	13	4	23	7	50	83	1314	342	2064	83	26	4	6	2	4	8	27	10	632	172	1489	347	1320	74	489	24	51	0
1105279	18.4213	0	0	0	167	0	0	0	1	0	11	91	115	525	99	1127	218	41	4	7	0	7	10	20	9	49	60	1347	357	1872	86	28	4	13	0	7	13	20	22	664	216	1487	393	1340	97	464	23	54	9
1106291	18.4382	0	0	2	190	0	3	3	2	3	12	76	95	571	116	1172	211	38	13	1	2	4	21	16	6	46	66	1241	378	1862	79	23	13	10	0	6	5	24	25	662	204	1317	358	1271	75	515	58	43	1
1107303	18.455	0	0	3	183	0	2	0	2	2	13	72	116	525	125	1074	214	32	1	4	1	4	7	31	15	46	85	1250	410	1806	84	24	4	15	6	12	4	19	21	582	177	1333	328	1233	68	443	45	44	6
1108315	18.4719	0	8	0	182	0	1	3	1	4	8	63	114	515	98	1166	231	19	0	2	0	6	14	27	14	50	78	1347	325	2005	73	16	2	10	2	5	5	21	22	635	214	1423	355	1261	85	469	37	45	2
1109327	18.4888	0	0	3	161	1	1	0	4	5	7	73	124	567	130	1199	209	20	1	12	0	4	9	16	13	53	75	1321	347	1778	75	11	5	18	1	6	5	16	24	589	180	1388	365	1369	81	456	38	40	12
1110340	18.5057	0	0	1	203	0	0	0	3	3	4	61	113	589	103	1188	237	19	3	8	3	7	9	13	15	44	79	1295	374	2001	104	25	6	11	3	6	5	18	23	679	206	1589	367	1330	82	491	30	55	8
1111352	18.5225	0	8	0	183	0	1	0	2	1	5	61	102	540	102	1139	201	30	1	7	2	1	21	15	11	43	72	1313	425	1838	81	10	2	10	1	13	7	19	47	598	192	1432	402	1272	84	483	39	44	0
1112364	18.5394	0	1	1	159	0	1	0	0	7	9	66	102	563	105	1237	232	16	2	3	1	6	7	20	12	39	83	1359	400	2030	95	31	3	13	3	9	2	29	20	660	153	1508	379	1362	96	482	42	52	0
1113376	18.5563	0	0	1	180	0	0	0	2	2	11	59	100	542	138	1297	241	29	1	16	3	8	26	23	7	41	81	1238	374	1958	94	19	1	17	2	10	1	25	36	639	165	1570	410	1304	89	510	50	60	7
1114388	18.5731	0	5	0	184	0	0	0	2	6	9	65	100	555	138	1234	252	30	2	5	3	6	10	20	10	29	66	1387	369	1958	112	29	0	19	1	3	6	21	28	648	178	1476	399	1374	95	508	52	42	11
1115401	18.59	0	0	0	184	0	0	0	5	6	6	95	80	574	138	1232	240	18	1	2	5	6	11	24	3	55	60	1395	389	2001	79	28	2	11	3	7	5	23	18	585	200	1465	387	1447	49	465	46	61	8
1116413	18.6069	0	0	2	170	0	2	0	3	3	6	69	90	499	106	1185	231	29	3	8	0	6	8	21	14	42	61	1261	357	1850	83	19	3	10	2	8	5	27	18	584	154	1455	334	1331	62	473	47	56	4
1117425	18.6238	0	0	2	197	0	2	1	1	5	10	81	84	550	88	1194	224	26	2	3	0	2	14	19	10	55	72	1221	400	1882	81	27	2	15	10	4	6	23	19	586	194	1398	355	1308	65	473	43	50	14
1118437	18.6406	0	0	7	183	0	1	1	8	11	8	60	106	468	114	1065	239	15	0	5	0	5	17	23	1	50	76	1317	354	1930	98	23	5	21	2	7	4	21	24	611	187	1386	341	1235	79	438	65	50	13
1119449	18.6575	0	6	7	178	0	1	0	0	2	10	85	111	500	100	1142	224	24	0	3	1	6	9	17	5	67	52	1296	401	1938	89	24	3	15	6	9	2	19	23	604	195	1428	414	1374	76	490	61	50	7
1120461	18.6744	0	8	1	203	0	2	1	2	4	13	65	87	547	96	1088	233	28	1	5	0	3	12	22	7	52	81	1274	377	1948	66	22	6	14	4	3	1	27	16	605	189	1497	405	1310	53	478	48	41	15
1121474	18.6912	0	0	0	175	0	0	0	3	2	8	64	120	493	126	1069	213	22	7	17	4	6	14	23	10	24	81	1293	373	1710	88	30	4	17	8	5	5	15	19	602	197	1372	311	1266	81	477	39	49	10
1122486	18.7081	0	3	0	179	0	0	0	2	4	10	64	100	464	94	1044	229	33	1	4	1	6	12	10	14	57	62	1275	376	1836	61	28	0	24	0	6	3	28	21	592	186	1403	398	1384	63	461	26	35	10
1123498	18.725	0	1	0	188	0	0	1	0	0	4	63	126	477	86	1064	191	24	3	6	5	6	17	22	5	68	64	1172	341	1692	80	24	2	13	5	4	10	24	22	574	172	1411	314	1252	66	483	25	47	0
1124510	18.7418	0	0	0	182	0	0	0	4	7	8	68	108	509	117	1070	212	25	6	7	0	2	16	19	6	37	90	1142	345	1715	83	26	0	20	1	4	3	20	23	594	152	1356	315	1244	75	503	36	40	11
1125522	18.7587	0	1	0	159	0	2	1	2	4	6	74	106	463	117	1028	235	27	6	4	2	6	14	16	14	49	52	1310	359	1818	78	38	0	16	0	8	9	31	23	571	226	1307	322	1320	82	481	25	59	4
1126535	18.7756	0	0	1	177	0	1	1	2	2	9	60	103	507	114	1086	200	22	2	8	0	6	6	8	18	47	78	1236	345	1812	81	34	2	17	3	7	0	24	20	560	198	1287	394	1260	83	468	25	38	3
1127547	18.7924	0	0	0	187	0	0	0	4	4	9	66	90	474	92	1178	198	24	2	9	7	4	14	10	6	43	69	1258	382	1845	85	22	1	18	0	20	4	20	19	540	161	1397	349	1381	63	484	36	47	2
1128559	18.8093	0	0	0	180	1	0	1	0	1	7	69	109	545	101	1061	237	39	4	3	3	4	16	13	6	45	67	1198	360	1810	94	26	1	13	2	8	8	17	25	557	150	1335	373	1210	81	463	41	38	13
1129571	18.8262	0	15	0	184	0	2	0	6	2	6	64	93	548	119	1097	207	23	2	4	3	5	22	22	12	45	76	1274	392	1914	85	35	0	9	1	15	0	27	18	556	194	1325	325	1314	68	454	50	28	16
1130583	18.8431	0	2	2	184	0	0	0	1	3	6	70	95	429	92	1087	200	39	0	7	1	7	15	19	13	52	73	1116	306	1829	93	21	1	19	4	6	3	28	20	533	138	1321	340	1258	74	495	72	32	8
1131595	18.8599	0	2	5	179	0	4	1	8	2	9	46	100	483	95	1056	217	23	2	10	0	3	14	19	14	42	63	1202	401	1787	74	28	2	18	2	5	0	33	26	545	166	1396	365	1139	71	471	24	50	2
1132608	18.8768	0	3	0	202	0	0	0	2	10	12	68	93	445	124	1085	246	42	0	5	0	8	16	18	11	45	92	1193	336	1800	110	23	7	19	3	7	6	39	22	577	178	1370	411	1178	92	457	45	49	9
1133620	18.8937	0	0	2	176	2	1	0	5	5	9	76	108	498	95	1051	210	45	2	12	2	5	9	24	11	55	87	1319	372	1773	75	22	4	16	6	2	0	27	23	516	180	1343	382	1304	91	546	61	53	15
1134632	18.9105	0	0	5	209	1	2	0	2	1	11	61	99	448	105	1025	236	45	7	3	1	2	17	28	9	50	63	1223	364	1810	65	18	4	15	3	5	3	21	25	590	197	1395	403	1140	62	510	54	70	2
1135644	18.9274	0	3	1	181	0	8	4	2	3	4	51	89	487	107	1076	197	29	2	6	5	7	13	15	12	25	46	1121	353	1654	65	32	2	9	2	12	7	24	21	549	192	1281	312	1204	67	471	40	49	10
1136656	18.9443	0	0	0	178	2	0	0	2	5	3	71	90	503	106	980	210	20	3	7	1	6	16	24	10	38	42	1159	326	1742	65	21	0	8	2	4	7	32	29	562	161	1225	368	1224	75	419	45	50	7
1137669	18.9611	0	0	3	163	0	0	1	0	1	7	64	127	442	105	987	237	15	2	8	13	8	10	22	13	49	40	1090	325	1735	64	28	0	15	2	5	4	17	27	608	172	1246	325	1206	78	514	39	55	6
1138681	18.978	0	5	0	194	0	2	2	9	7	7	60	95	479	106	920	198	29	5	12	0	6	10	17	5	24	28	1147	306	1573	74	21	4	7	0	2	8	23	24	558	184	1266	292	1184	63	440	33	65	2
1139693	18.9949	0	0	2	181	0	2	0	2	13	2	68	90	407	108	1056	205	28	0	6	1	11	15	19	13	34	54	1133	308	1692	57	28	2	20	2	9	6	20	24	532	169	1256	344	1053	54	508	37	43	11
1140705	19.0117	0	0	2	210	0	1	3	2	5	8	56	107	462	103	997	254	18	3	7	1	12	11	26	9	20	87	1113	346	1778	74	27	4	9	3	8	1	21	20	518	167	1226	297	1140	58	470	31	45	3
1141717	19.0286	0	0	0	178	0	2	1	1	1	2	37	118	467	112	951	254	21	6	3	0	7	10	19	13	29	72	1115	329	1620	83	23	3	25	4	4	3	13	13	551	189	1243	332	1101	72	545	46	53	8
1142729	19.0455	0	0	2	178	0	0	1	0	2	5	42	85	443	99	983	212	28	4	7	1	4	11	19	7	47	57	1107	309	1652	85	28	4	11	2	4	1	22	15	525	149	1265	370	1160	62	472	65	50	4
1143742	19.0624	0	1	1	162	1	0	1	1	6	5	78	105	479	109	971	224	22	4	9	5	4	18	19	5	35	72	1114	330	1732	72	23	5	9	10	6	1	17	17	558	164	1322	278	1125	74	524	43	49	5
1144754	19.0792	0	0	2	212	0	0	0	4	6	3	51	95	455	82	1004	224	27	1	10	1	3	0	25	13	21	75	1142	303	1686	71	27	6	19	3	7	3	31	22	546	148	1164	337	1145	66	469	29	36	2
1145766	19.0961	0	2	1	171	0	0	0	4	5	6	70	108	448	102	973	237	27	4	11	3	6	8	17	4	33	43	1019	336	1631	64	23	1	7	0	6	3	30	26	486	139	1263	357	1104	38	435	27	31	3
1146778	19.113	0	3	0	175	1	1	4	1	4	7	59	116	442	115	947	208	45	1	6	0	9	8	19	11	19	65	1119	304	1676	64	25	1	13	2	8	9	12	25	477	117	1160	336	1109	33	491	44	30	11
1147790	19.1298	0	2	0	195	0	1	0	8	0	3	68	118	491	91	900	210	44	3	6	0	10	10	21	8	27	71	1054	305	1717	76	23	0	18	0	10	6	18	24	537	139	1159	313	1106	30	505	49	31	5
1148803	19.1467	0	0	3	179	0	3	1	8	1	6	64	100	414	92	931	194	27	3	8	3	4	11	18	13	39	43	1081	280	1546	73	21	2	6	3	12	9	18	25	467	147	1173	314	1072	52	483	38	28	7
1149815	19.1636	0	2	1	190	0	3	0	5	3	4	78	111	447	76	934	204	27	0	9	1	7	9	22	3	51	60	1079	331	1568	67	23	3	14	1	7	4	29	24	513	154	1270	280	1119	71	491	23	52	8
1150827	19.1805	0	2	0	168	0	0	2	3	4	3	63	99	442	82	924	232	28	1	3	3	3	9	24	6	25	77	1082	320	1632	73	28	6	19	8	1	3	23	22	513	107	1169	282	1084	80	496	34	41	7
1151839	19.1973	0	0	0	200	0	0	1	0	4	6	57	82	489	78	976	204	53	1	4	1	5	13	23	8	43	70	1082	269	1532	75	25	7	16	0	4	8	33	20	556	153	1199	281	1101	51	479	35	60	9
1152851	19.2142	0	2	4	170	0	1	0	1	0	7	51	89	415	120	960	207	45	3	8	3	10	14	18	5	51	61	1000	301	1540	48	28	4	14	0	5	8	30	20	564	171	1154	320	1075	63	500	38	57	10
1153863	19.231	0	3	0	186	0	0	1	8	0	8	56	96	428	94	987	209	31	2	12	0	9	11	13	4	46	57	1022	255	1566	75	14	2	14	0	14	2	23	24	526	177	1268	297	1149	62	404	28	53	3
1154876	19.2479	0	2	0	189	0	0	0	11	1	3	64	111	469	91	880	193	13	6	6	3	8	12	20	7	45	46	1038	314	1557	60	27	4	16	3	6	4	20	22	505	168	1197	303	1027	51	473	32	27	13
1155888	19.2648	0	0	2	180	0	0	1	2	0	12	83	101	388	76	841	233	19	3	5	1	7	14	24	2	15	60	1026	300	1443	89	19	0	15	2	10	1	24	21	466	162	1207	303	1009	63	509	45	23	4
1156900	19.2817	0	2	0	191	0	0	3	0	1	1	61	89	373	86	874	175	35	2	9	2	4	20	28	12	26	51	1077	291	1415	59	30	1	18	0	1	10	31	18	520	147	1093	279	1034	55	513	38	59	6
1157912	19.2985	0	1	0	169	0	0	0	2	1	7	27	94	467	100	865	225	20	1	8	2	7	12	24	5	24	54	960	307	1514	73	24	5	10	2	12	7	31	27	476	148	1150	283	995	44	521	30	37	5
1158924	19.3154	0	0	0	183	0	0	1	2	1	3	64	83	371	70	946	257	28	3	11	4	10	14	19	6	29	66	1012	253	1425	68	31	6	13	1	7	12	23	29	505	140	1170	278	1021	46	459	31	37	11
1159937	19.3323	0	0	2	225	0	0	0	6	4	6	62	119	412	107	894	216	26	2	7	1	10	7	19	3	29	56	1048	276	1423	58	29	8	13	4	6	6	20	16	545	125	1197	279	1039	66	509	24	35	6
1160949	19.3492	0	3	2	179	0	0	4	0	3	10	53	109	412	110	889	214	21	0	12	0	14	13	24	8	52	55	1091	289	1502	65	25	1	16	1	8	3	25	22	512	181	1196	276	1014	58	516	15	23	9
1161961	19.366	0	0	2	191	0	1	0	2	6	6	59	116	366	84	861	197	26	3	9	4	11	7	23	3	39	55	1010	317	1437	65	14	6	12	4	10	1	25	27	545	155	1210	292	999	38	478	35	39	15
1162973	19.3829	0	1	0	161	0	0	0	2	2	9	51	115	461	68	831	217	21	4	9	6	2	6	18	13	24	67	1003	300	1483	54	33	1	13	2	10	6	30	24	478	153	1109	279	1006	41	520	29	50	2
1163985	19.3998	0	1	0	174	0	2	0	2	8	5	43	94	417	86	860	195	29	6	4	1	6	5	13	18	27	81	983	285	1431	52	19	2	16	1	6	1	23	17	445	141	1109	294	922	44	531	68	49	7
1164998	19.4166	0	2	0	194	0	1	1	0	1	10	43	113	382	60	834	276	30	2	8	3	8	1	8	17	47	47	1053	281	1523	56	29	3	17	0	8	2	12	20	486	167	1115	289	937	45	480	51	54	0
1166010	19.4335	0	0	3	193	0	1	1	0	1	9	61	88	373	92	847	191	24	1	4	4	1	6	18	13	44	50	1002	330	1459	72	34	4	17	1	3	2	24	26	474	136	1081	303	1001	33	528	58	48	12
1167022	19.4504	0	1	0	162	1	0	0	6	5	7	59	94	404	85	837	204	23	0	6	0	7	7	12	6	52	46	1015	292	1499	53	17	3	14	2	9	4	19	19	488	158	1071	262	1069	58	441	44	41	9
1168034	19.4672	0	3	2	194	0	0	1	1	4	2	45	102	409	74	836	217	19	3	7	1	5	12	18	10	33	47	1023	289	1421	64	27	2	11	1	6	6	25	31	442	163	1176	264	1035	48	526	52	46	10
1169046	19.4841	0	3	1	194	0	0	2	8	5	20	91	99	408	97	870	211	40	3	3	1	3	11	14	6	58	45	1012	230	1537	80	31	0	12	1	15	7	23	17	505	149	1183	295	1019	79	462	42	60	7
1170058	19.501	0	1	0	167	0	1	0	2	2	8	58	119	376	88	861	222	31	2	6	2	5	18	22	7	46	38	944	258	1532	64	28	1	6	4	20	6	17	17	462	127	1113	258	1025	60	508	45	64	5
1171071	19.5178	0	0	0	200	0	0	0	3	1	16	53	110	410	87	797	221	31	0	3	5	8	14	25	6	30	54	944	244	1522	70	30	0	18	2	12	5	22	30	499	142	1018	302	845	57	428	54	25	2
1172083	19.5347	0	5	0	194	0	0	2	1	10	4	54	79	384	71	861	235	33	5	11	1	2	15	15	16	29	57	963	294	1413	57	29	2	12	5	10	2	16	16	511	118	1088	312	932	52	494	47	24	8
1173095	19.5516	0	1	0	198	0	2	2	0	2	7	56	91	330	61	810	215	21	3	6	3	8	9	17	7	29	47	936	264	1376	67	32	0	15	2	4	3	19	26	460	130	1077	276	963	47	518	26	51	5
1174107	19.5684	0	0	0	199	0	0	0	3	2	12	51	125	353	75	793	218	15	6	8	3	12	11	30	13	22	66	948	287	1351	40	25	1	4	5	10	1	22	30	459	136	1037	252	888	59	480	45	48	9
1175119	19.5853	0	2	3	202	0	0	2	5	0	7	60	98	368	91	797	260	25	4	11	2	3	9	20	17	26	61	978	257	1434	19	22	1	14	1	6	1	32	24	500	146	1110	284	906	72	504	32	57	14
1176132	19.6022	0	0	0	212	0	0	0	5	4	7	69	94	360	90	861	218	27	3	9	0	8	15	23	9	16	74	948	254	1392	45	45	3	15	1	7	0	33	17	504	166	1083	283	987	62	496	43	45	10
1177144	19.6191	0	1	0	176	0	1	0	2	3	5	40	106	374	79	748	191	17	3	11	3	3	10	27	12	28	21	986	301	1407	60	15	4	10	2	5	4	14	21	473	120	983	266	966	48	479	38	36	7
1178156	19.6359	0	5	0	201	0	0	1	2	2	2	53	116	339	64	715	196	30	3	8	1	10	12	16	5	32	33	914	266	1334	35	35	5	26	4	4	8	24	13	414	131	1048	285	822	28	476	33	17	6
1179168	19.6528	0	0	1	214	1	0	0	1	5	4	68	85	303	75	815	219	34	1	5	0	3	20	23	2	21	59	952	288	1354	49	38	1	23	4	11	3	20	28	452	135	984	243	871	33	410	22	53	6
1180180	19.6697	0	4	0	208	0	1	1	2	8	14	58	96	336	89	786	226	20	4	7	0	6	8	12	7	38	48	894	254	1297	60	27	4	8	3	4	2	17	15	446	161	1000	275	897	62	449	43	40	11
1181192	19.6865	0	0	0	195	0	0	0	4	6	13	48	116	370	70	810	216	28	2	12	1	3	23	13	14	24	52	1023	248	1352	60	23	11	19	4	11	0	18	27	448	115	1071	284	895	56	521	41	39	12
1182205	19.7034	0	3	0	176	0	2	1	3	2	3	56	104	411	78	815	193	25	7	9	0	7	11	18	1	15	44	938	231	1430	64	25	2	10	2	5	9	25	16	446	126	1065	258	826	46	441	31	55	10
1183217	19.7203	0	0	2	185	0	1	0	4	7	6	60	103	381	87	728	185	27	3	3	1	7	10	16	10	25	43	924	254	1331	48	25	1	9	4	14	3	37	12	449	123	996	251	891	44	505	44	43	5
1184229	19.7371	0	1	3	202	0	0	4	4	7	7	52	105	372	59	786	228	30	0	15	3	7	7	20	9	29	66	935	237	1221	48	16	0	17	3	8	10	14	19	436	136	1021	273	878	45	478	41	71	4
1185241	19.754	0	0	2	209	4	0	0	2	1	7	60	123	373	83	733	224	32	7	8	0	4	12	24	8	36	68	912	249	1252	76	24	0	17	3	3	11	19	20	455	120	988	262	852	49	493	45	56	4
1186253	19.7709	0	0	1	192	0	0	1	1	4	2	65	97	333	77	801	213	8	0	11	2	3	8	23	15	16	44	998	247	1400	58	19	2	10	3	3	2	14	27	483	131	1068	240	936	49	482	54	44	7
1187266	19.7878	0	0	0	191	1	0	2	2	2	8	45	92	372	93	804	214	30	4	8	0	7	6	18	4	28	54	979	264	1349	70	15	3	7	4	3	6	24	28	438	145	1051	262	872	47	447	58	36	11
1188278	19.8046	0	0	3	173	3	1	1	1	3	8	59	114	386	68	750	211	27	6	6	2	6	9	19	9	29	70	943	255	1298	60	23	6	14	2	7	3	20	39	429	147	1126	251	919	56	473	44	40	11
1189290	19.8215	0	0	3	202	1	1	0	2	8	4	43	119	355	65	819	224	59	1	7	4	9	12	23	12	22	77	960	273	1411	59	18	2	14	7	7	3	17	17	502	133	1056	270	970	55	482	45	38	6
1190302	19.8384	0	1	0	191	0	1	0	0	2	1	38	108	410	72	796	193	41	3	8	0	13	9	21	12	27	63	953	243	1347	77	19	3	10	1	6	3	17	19	485	174	1129	284	999	39	485	52	37	2
1191314	19.8552	0	0	2	148	0	2	0	4	3	4	59	105	379	71	858	236	20	4	8	2	7	5	23	4	33	37	1011	312	1383	62	27	5	11	0	6	5	32	26	469	141	1107	293	956	28	514	26	38	11
1192326	19.8721	0	5	0	188	0	1	0	2	3	9	71	89	351	79	870	219	31	2	5	4	7	8	17	10	28	28	966	278	1328	44	17	5	16	1	4	3	14	27	507	161	1082	260	938	52	452	51	51	4
1193339	19.889	0	1	0	207	0	0	0	5	2	6	50	105	360	84	763	226	26	0	9	2	3	10	19	10	39	29	953	284	1236	67	27	6	12	5	3	4	20	22	395	121	1009	216	904	61	497	52	34	19
1194351	19.9059	0	0	1	181	0	5	1	3	9	4	35	82	415	85	825	214	25	1	7	0	6	10	26	5	19	31	883	263	1366	49	28	1	11	4	4	1	17	19	465	150	1005	289	937	63	504	43	34	5
1195363	19.9227	0	0	0	173	0	0	5	5	0	9	53	110	346	82	752	225	41	6	10	2	7	5	13	9	34	46	993	243	1408	67	17	0	14	9	2	5	18	27	456	134	1057	247	900	26	481	45	47	2
1196375	19.9396	0	0	3	207	0	2	1	4	6	4	46	78	360	100	726	221	41	1	5	1	6	17	18	12	29	48	938	253	1307	52	20	3	15	5	6	0	19	21	407	134	1040	263	891	42	457	22	45	12
1197387	19.9565	0	0	1	195	0	1	0	3	2	9	51	113	349	75	721	224	38	3	10	4	8	12	21	5	21	40	855	233	1343	61	22	7	17	1	1	10	18	30	440	133	1034	254	893	42	487	18	53	9
1198400	19.9733	0	0	0	191	0	0	2	3	4	10	38	108	348	52	710	207	31	0	12	2	8	13	18	15	34	42	913	266	1265	43	17	2	15	3	10	7	20	29	461	169	956	253	847	0	474	24	61	2
1199412	19.9902	0	2	0	201	0	0	0	0	4	7	56	94	315	74	695	208	27	1	9	0	8	11	42	14	17	32	791	257	1279	46	22	2	24	0	5	2	15	24	450	118	929	242	895	18	513	21	62	3
1200424	20.0071	0	0	1	190	0	1	0	1	2	10	49	91	384	71	725	237	48	2	8	3	5	8	19	9	24	25	817	217	1219	53	20	3	18	3	17	1	20	27	345	145	956	238	954	37	453	36	36	11
1201436	20.0239	0	0	1	210	2	0	1	4	7	19	63	101	337	64	711	204	46	5	7	3	7	13	18	12	27	54	892	256	1233	41	23	1	13	1	8	10	26	22	455	121	975	236	823	37	461	43	33	7
1202448	20.0408	0	0	0	243	0	0	0	1	2	10	57	104	316	99	712	179	23	2	9	2	7	8	16	8	32	55	947	230	1261	44	22	3	9	6	1	0	17	27	412	136	927	250	907	38	506	40	46	11
1203460	20.0577	0	0	0	131	1	0	0	0	1	8	46	130	302	76	697	216	22	0	5	1	3	16	27	8	28	67	810	222	1274	33	30	0	9	1	9	0	20	28	427	105	973	239	740	65	486	28	56	4
1204473	20.0745	0	0	0	180	1	1	3	1	5	9	52	96	325	95	710	204	24	2	4	0	11	10	21	9	17	51	771	219	1200	40	26	1	15	3	6	4	20	17	355	112	938	235	861	60	486	17	69	13
1205485	20.0914	0	0	0	189	0	0	0	3	2	7	53	103	337	71	694	237	21	6	12	0	5	12	18	10	29	18	856	233	1184	53	22	3	17	7	13	4	24	22	428	117	941	268	874	52	472	22	17	15
1206497	20.1083	0	4	0	190	0	0	1	5	3	4	49	91	324	84	734	169	19	4	4	1	8	11	27	8	37	26	830	255	1214	59	31	1	14	4	17	2	20	15	405	114	940	238	818	30	495	37	64	12
1207509	20.1252	0	6	0	194	1	1	0	3	6	10	29	90	327	55	695	241	11	2	5	5	7	13	17	1	28	39	779	200	1170	67	17	4	24	1	7	13	23	25	404	121	901	258	921	47	506	48	68	5
1208521	20.142	0	1	0	157	0	1	3	0	0	15	50	99	299	69	707	194	23	2	12	4	6	11	19	11	30	56	760	201	1128	66	27	1	14	1	7	5	27	15	398	108	932	246	834	50	507	52	42	12
1209534	20.1589	0	2	2	213	0	1	0	1	0	8	46	94	319	64	702	257	31	2	5	6	5	16	12	8	33	55	815	214	1157	64	23	4	9	2	7	7	18	18	405	133	897	209	832	43	491	53	46	8
1210546	20.1758	0	0	0	181	0	3	0	0	4	4	49	112	384	61	680	214	32	2	8	5	7	9	22	6	46	48	905	209	1182	42	31	1	14	3	3	1	23	16	402	121	1007	216	784	52	496	34	55	9
1211558	20.1926	0	0	0	198	0	0	0	4	1	5	53	96	327	65	623	203	28	3	4	3	3	9	19	14	18	38	842	201	1061	51	30	2	11	0	5	3	27	18	418	123	909	241	809	59	503	20	46	8
1212570	20.2095	0	0	0	214	0	2	1	4	5	7	44	102	333	69	658	205	38	5	9	3	3	11	15	9	19	46	820	229	1212	56	36	4	15	4	7	6	18	10	364	116	860	191	825	24	516	20	54	5
1213582	20.2264	0	0	1	165	0	2	0	3	0	3	58	107	338	70	628	206	44	3	6	1	11	7	25	2	30	45	796	201	1093	54	26	2	14	5	3	9	14	25	401	100	870	215	849	19	498	22	46	11
1214594	20.2432	0	2	0	219	0	2	0	0	3	3	53	98	339	69	663	205	41	3	9	0	5	12	17	7	34	29	815	227	1067	77	13	2	21	3	8	2	21	12	357	104	835	226	809	38	478	44	60	17
1215607	20.2601	0	1	0	183	2	2	3	2	2	4	53	127	302	60	687	227	31	1	8	1	12	14	23	17	16	22	738	173	1128	47	21	5	15	3	2	2	20	37	311	115	895	217	795	33	437	47	53	7
1216619	20.277	0	2	2	191	0	0	1	3	4	9	39	97	344	54	630	233	30	1	6	3	3	20	22	11	26	21	712	230	1175	36	26	5	10	2	15	2	18	19	397	148	886	222	637	42	462	57	76	3
1217631	20.2938	0	0	3	181	1	0	0	1	1	10	57	98	283	74	659	212	33	4	9	1	6	13	23	3	18	36	694	232	1073	59	27	3	12	3	12	6	21	19	396	105	827	235	756	27	450	41	55	8
1218643	20.3107	0	2	0	161	0	0	1	2	2	9	15	91	313	67	569	202	22	2	7	7	4	18	15	3	16	38	738	218	1120	64	17	4	9	1	16	4	15	19	403	130	930	219	789	20	462	41	41	0
1219655	20.3276	0	0	0	201	0	1	2	3	0	12	51	95	291	49	610	210	34	3	13	1	3	8	27	5	31	20	796	223	1037	27	26	0	16	3	3	1	15	25	376	106	814	270	711	27	486	27	43	9
1220668	20.3445	0	0	0	166	0	0	0	1	7	6	68	104	269	49	603	217	28	1	3	0	2	8	28	7	19	23	772	232	1068	47	20	0	13	0	16	8	19	12	369	109	880	180	745	27	511	48	48	10
1221680	20.3613	0	0	0	189	2	3	0	2	2	8	46	108	304	71	613	203	29	9	6	0	7	8	19	5	31	22	778	206	1111	60	31	5	4	0	3	4	17	14	396	100	963	223	702	31	524	53	56	12
1222692	20.3782	0	0	0	197	0	0	5	1	2	7	53	104	348	50	663	212	36	5	5	10	3	10	14	15	28	20	752	232	1076	46	17	5	21	3	3	2	24	22	343	104	890	187	713	31	488	41	62	10
1223704	20.3951	0	0	0	175	0	0	6	0	2	1	48	97	267	47	585	196	34	5	19	1	8	18	15	11	25	33	768	242	1051	46	20	2	11	7	7	9	10	9	351	114	890	207	718	21	522	25	42	10
1224716	20.4119	0	0	4	173	0	1	2	2	7	5	47	98	288	52	607	252	21	0	5	1	7	17	21	5	31	20	737	180	1146	40	30	2	8	5	10	4	16	21	363	108	848	258	799	44	465	38	26	1
1225728	20.4288	0	0	1	166	0	0	0	0	5	4	18	111	288	35	599	202	40	1	9	0	4	7	16	7	23	26	710	212	1042	54	24	3	13	1	5	7	23	26	321	94	868	207	757	40	525	40	23	9
1226741	20.4457	0	0	4	190	0	1	1	1	4	9	34	105	326	92	628	220	42	1	5	0	6	8	21	7	20	23	683	190	1060	48	17	0	12	2	3	2	27	16	346	75	829	183	707	46	532	42	30	4
1227753	20.4626	0	1	0	178	0	1	2	2	3	5	41	115	292	65	595	219	30	2	7	0	6	12	18	5	23	24	623	221	1032	27	23	9	16	0	6	1	13	23	355	99	799	173	752	35	451	56	36	5
1228765	20.4794	0	0	0	175	0	0	0	3	2	4	48	106	276	70	631	200	25	2	6	1	6	16	16	9	21	14	685	242	1105	37	29	0	18	2	8	1	23	18	369	98	834	202	781	46	462	39	27	7
1229777	20.4963	0	0	3	175	1	1	0	4	3	2	58	96	290	64	677	204	22	0	5	1	2	13	21	6	20	30	734	220	1042	30	30	5	8	2	9	10	19	20	348	95	862	221	787	25	512	50	59	7
1230789	20.5131	0	1	3	174	0	1	0	5	5	14	52	111	295	57	636	230	30	3	10	4	8	14	18	15	27	19	720	186	1002	39	18	6	14	4	3	10	13	13	331	107	841	195	712	12	495	59	41	6
1231802	20.53	0	0	0	163	0	4	0	2	5	5	45	98	282	56	575	257	23	2	8	5	8	9	21	14	21	37	660	237	1084	49	27	0	12	4	9	9	12	16	347	106	832	199	753	15	468	41	39	6
1232814	20.5469	0	1	0	190	0	1	0	0	6	8	48	98	298	60	623	202	30	2	3	1	8	7	18	8	21	56	696	211	1079	46	28	3	20	2	7	5	23	12	359	115	809	174	713	17	452	54	56	4
1233826	20.5638	0	1	2	235	0	0	0	4	1	8	42	77	289	66	681	236	28	3	3	4	4	9	19	3	21	24	698	193	970	38	23	2	14	7	6	6	17	27	382	117	851	184	721	14	510	53	75	8
1234838	20.5806	0	0	2	207	1	3	0	2	1	4	39	96	304	59	570	210	42	1	2	0	9	10	12	5	27	25	671	212	1044	40	22	1	22	0	7	3	14	22	397	112	841	212	786	33	503	33	51	8
1235850	20.5975	0	0	3	211	0	0	0	5	7	8	42	127	298	60	557	228	48	4	3	0	3	14	25	8	46	28	689	180	1027	40	30	2	21	2	11	6	21	22	355	106	809	196	691	29	465	36	61	4
1236862	20.6144	0	0	2	177	0	1	3	0	2	8	31	112	260	72	587	205	24	3	6	0	12	19	18	5	18	27	689	203	971	39	17	1	17	7	5	6	17	19	374	103	782	194	691	35	471	44	44	5
1237875	20.6313	0	0	1	192	1	1	3	3	3	10	6	109	277	82	571	239	28	3	4	1	3	6	16	4	19	41	645	206	1041	41	16	1	11	2	3	4	16	16	331	93	781	152	690	46	452	41	63	7
1238887	20.6481	0	0	1	213	0	1	0	3	8	5	26	109	275	66	640	227	25	1	8	1	5	14	24	7	20	42	764	207	1089	51	23	1	15	3	8	2	20	12	328	129	777	185	647	54	484	39	57	7
1239899	20.665	0	0	1	188	0	0	0	0	2	5	47	99	272	70	575	232	16	2	9	0	5	14	23	4	18	28	717	180	993	50	26	2	17	3	12	7	18	13	366	125	761	177	620	49	489	47	59	17
1240911	20.6819	0	0	0	185	1	5	0	2	3	4	53	120	274	67	595	211	17	3	7	0	1	6	23	2	23	16	694	170	993	54	14	3	8	6	5	6	13	23	326	84	786	177	674	28	462	48	52	7
1241923	20.6987	0	0	1	171	0	0	1	5	3	5	27	110	292	45	541	213	40	6	7	4	7	8	20	13	27	25	655	181	1004	24	29	3	17	4	12	0	24	12	336	102	792	202	683	20	511	18	58	9
1242936	20.7156	0	0	0	186	0	1	1	3	3	5	46	106	276	42	611	197	42	4	4	0	3	5	26	10	31	19	705	171	968	21	26	5	16	0	11	9	16	17	351	73	779	179	602	26	488	48	60	0
1243948	20.7325	0	0	1	176	0	1	0	4	5	4	34	90	243	46	544	212	22	4	6	2	6	12	16	10	21	29	621	200	939	17	20	6	18	0	13	3	21	16	306	103	757	213	634	21	478	48	53	7
1244960	20.7493	0	0	0	248	0	1	0	0	2	6	29	99	300	49	594	202	30	0	7	1	5	11	25	8	26	27	636	228	914	47	16	6	22	5	3	6	11	13	350	128	752	181	620	22	523	38	50	6
1245972	20.7662	0	0	1	162	0	0	0	3	2	4	35	108	253	42	581	177	22	4	4	2	6	11	25	8	23	22	591	190	984	16	16	0	8	4	4	7	24	10	305	91	694	161	669	36	466	41	57	15
1246984	20.7831	0	0	2	176	0	1	2	2	2	2	4	125	281	48	503	189	24	1	8	0	4	15	22	7	30	22	640	179	890	18	30	1	10	0	7	6	12	11	338	106	728	198	606	44	488	39	47	7
1247996	20.7999	0	0	3	182	0	1	0	3	4	10	17	112	261	70	557	216	39	2	5	4	4	4	30	4	23	28	622	189	906	37	23	1	19	2	3	8	24	10	345	80	728	177	571	22	530	46	41	2
1249009	20.8168	0	0	6	194	0	0	0	5	1	5	10	92	267	61	534	214	38	2	9	1	9	14	23	4	28	26	673	195	886	43	19	5	21	0	5	0	15	19	303	111	726	203	632	22	500	33	47	2
1250021	20.8337	0	3	0	207	0	1	1	1	0	11	37	108	267	53	548	244	45	3	3	1	6	5	19	1	22	31	645	165	890	22	19	4	19	1	4	6	23	20	289	82	687	195	639	50	501	58	55	5
1251033	20.8505	0	0	0	191	0	0	1	5	4	7	61	106	273	50	545	233	24	3	5	3	9	10	21	7	20	15	621	207	863	24	25	1	22	1	7	2	16	33	325	96	681	175	648	41	557	49	23	9
1252045	20.8674	0	0	5	173	3	1	0	3	2	2	54	105	234	46	517	193	27	1	6	0	2	14	18	7	20	26	594	192	913	13	23	5	16	9	6	6	19	17	366	100	707	180	600	19	511	41	55	17
1253057	20.8843	0	0	1	178	0	0	1	2	5	7	61	87	248	42	493	228	29	1	5	1	7	4	21	4	21	28	611	148	912	21	39	2	15	6	9	1	26	17	319	74	785	127	597	26	496	58	49	6
1254070	20.9012	0	1	0	197	0	0	0	7	3	0	55	88	266	49	516	217	35	6	4	2	10	10	19	13	22	28	599	177	919	28	24	3	10	3	11	3	20	12	319	87	674	156	600	25	508	52	63	3
1255082	20.918	0	0	1	162	0	0	0	4	4	6	59	88	286	35	526	194	26	3	7	1	2	5	21	9	27	35	582	162	922	36	27	2	15	4	9	2	20	21	281	90	769	184	609	18	506	36	65	14
1256094	20.9349	0	0	0	170	0	2	0	2	4	2	49	94	282	52	626	226	32	2	6	1	2	4	26	11	16	34	597	204	926	47	29	4	12	2	8	4	31	18	307	105	702	182	625	19	508	36	52	3
1257106	20.9518	0	0	1	193	1	4	0	3	1	3	23	90	261	65	523	197	48	3	4	5	5	17	16	10	22	21	594	174	890	39	27	2	7	1	10	8	19	28	325	82	669	152	644	28	486	21	31	5
1258118	20.9686	0	0	0	203	2	1	0	4	8	11	52	86	241	65	541	216	12	0	5	6	15	11	9	11	30	28	660	193	850	30	21	2	15	2	8	11	16	20	313	85	692	174	560	27	493	19	57	3
1259130	20.9855	0	0	1	230	0	1	0	3	2	8	44	96	240	45	539	206	57	2	3	0	7	12	16	9	19	27	561	190	817	26	16	3	23	1	5	7	12	17	335	103	647	198	613	18	530	41	47	7
1260143	21.0024	0	0	2	162	0	2	0	3	1	10	19	97	219	43	452	245	41	5	9	1	6	12	18	12	26	49	596	182	868	45	26	3	17	3	8	1	27	12	339	108	750	233	566	28	501	25	22	5
1261155	21.0192	0	0	2	170	0	0	2	4	1	6	21	89	280	50	511	227	36	2	5	1	9	7	23	5	24	26	616	204	925	49	15	0	14	2	9	5	15	17	293	96	675	166	612	28	422	17	52	0
1262167	21.0361	0	1	1	189	0	0	1	7	3	1	39	102	247	54	565	188	29	2	5	3	2	13	21	7	20	29	626	171	887	41	23	2	7	2	5	6	25	26	348	82	691	198	638	0	464	41	60	11
1263179	21.053	0	0	0	210	1	0	0	0	7	6	50	99	296	52	514	212	23	3	7	3	5	9	20	13	26	32	635	179	923	44	20	5	13	4	8	2	20	17	300	83	716	158	596	21	494	52	48	7
1264191	21.0698	0	3	0	195	0	0	0	5	1	4	41	93	245	59	514	218	27	2	4	1	3	7	21	5	17	57	630	192	810	28	16	0	16	2	10	3	12	18	295	92	714	180	596	20	491	40	30	3
1265204	21.0867	0	0	1	187	0	1	0	1	3	5	29	99	245	38	521	230	38	3	6	7	8	10	19	8	31	47	550	171	908	21	21	2	18	3	12	2	15	16	286	104	698	160	604	32	449	27	47	6
1266216	21.1036	0	5	0	197	0	1	0	3	0	5	29	91	249	42	489	238	20	1	5	0	18	16	20	7	20	48	593	158	870	17	30	4	14	3	2	2	23	14	281	68	723	160	603	23	457	46	71	2
1267228	21.1205	0	2	2	167	0	1	1	0	8	7	42	98	229	45	533	212	18	4	3	2	3	7	29	8	23	31	589	143	871	38	18	4	17	1	6	5	11	19	278	84	709	146	541	23	507	52	34	6
1268240	21.1373	0	0	1	185	0	1	1	1	2	0	30	99	250	27	527	213	20	0	2	1	2	14	29	7	30	36	546	187	831	49	19	4	12	0	9	9	22	28	310	95	684	187	562	30	529	60	43	3
1269252	21.1542	0	2	2	182	0	1	0	2	2	6	34	98	241	38	488	223	54	4	9	2	8	6	23	2	22	58	597	162	812	22	16	5	10	3	5	10	13	12	280	97	724	156	557	0	499	44	40	12
1270264	21.1711	0	0	6	161	0	0	0	2	3	8	28	79	236	55	476	186	39	3	4	3	2	12	25	10	25	22	565	156	796	17	18	1	17	7	9	4	23	18	291	83	734	162	568	27	518	72	27	3
1271277	21.188	0	1	0	223	0	0	0	1	2	4	15	105	247	47	496	233	38	0	4	0	3	10	18	4	22	24	566	160	825	53	33	8	11	0	16	9	15	7	320	98	745	155	538	27	502	59	44	5
1272289	21.2048	0	0	1	205	0	1	0	3	2	11	22	97	250	36	487	216	31	1	6	1	2	5	15	12	18	26	571	175	833	40	15	0	11	3	12	2	19	10	322	87	731	144	616	21	497	45	65	14
1273301	21.2217	0	2	0	191	1	0	0	2	0	6	23	107	210	28	491	213	21	2	2	3	7	10	13	13	12	29	634	180	820	23	27	1	7	2	4	4	19	14	290	75	690	198	568	0	516	23	52	2
1274313	21.2386	0	0	2	187	1	0	0	3	5	2	50	96	236	59	527	191	20	3	10	1	7	8	24	7	26	21	613	214	840	22	28	3	19	2	1	3	14	14	311	87	748	146	558	16	518	49	41	8
1275325	21.2554	0	0	4	181	3	0	0	2	5	2	40	92	241	52	489	229	19	1	5	4	6	16	21	12	30	24	621	207	767	11	18	4	13	0	1	7	21	16	289	91	683	150	550	19	524	46	47	13
1276338	21.2723	0	3	1	194	0	2	0	3	3	7	36	104	220	48	483	195	37	0	9	2	2	11	27	13	26	21	627	158	825	23	20	3	17	1	5	5	15	20	221	80	693	165	539	18	486	18	48	1
1277350	21.2892	0	0	1	183	2	0	0	3	3	7	45	101	229	22	500	224	28	2	4	7	0	0	20	16	27	20	581	160	847	18	22	3	20	0	12	7	23	9	255	70	702	139	589	23	494	45	50	11
1278362	21.306	0	0	0	188	0	0	0	3	1	8	38	125	232	33	461	182	28	1	8	0	9	6	18	4	17	24	579	166	794	31	25	1	12	2	8	1	13	15	273	69	618	190	482	33	499	47	44	5
1279374	21.3229	0	0	0	190	0	1	0	1	4	16	60	111	226	34	487	229	25	5	3	0	4	13	22	3	29	24	565	188	799	29	32	2	21	0	2	2	17	11	259	77	610	162	509	23	506	49	53	6
1280386	21.3398	0	3	1	209	0	2	1	5	4	7	44	103	256	26	463	232	24	9	5	4	13	18	13	5	16	30	538	174	781	17	20	8	22	3	9	6	8	25	241	69	594	130	471	28	459	49	67	20
1281398	21.3566	0	0	1	193	0	2	2	3	2	13	27	98	225	46	454	215	40	1	11	0	1	12	8	7	28	33	507	192	836	15	25	5	13	0	4	2	11	14	279	75	694	130	525	30	558	40	60	12
1282411	21.3735	0	0	1	211	0	0	1	1	7	8	34	110	207	43	506	226	43	12	7	2	3	11	20	3	32	26	566	122	786	28	25	3	9	5	5	6	13	6	238	88	653	154	581	29	527	45	51	4
1283423	21.3904	0	0	0	188	0	2	1	3	0	7	23	100	230	48	506	186	53	0	8	2	10	14	21	9	17	19	533	166	752	28	26	3	12	2	3	2	16	18	244	106	673	168	521	29	531	35	48	10
1284435	21.4073	0	0	0	159	0	0	1	2	4	6	32	99	204	61	467	202	31	4	12	4	6	13	22	8	23	20	540	160	817	27	19	5	7	5	4	5	10	21	255	78	627	179	544	20	529	13	58	8
1285447	21.4241	0	0	0	210	1	2	0	7	6	5	45	97	222	34	450	199	31	0	14	2	4	15	16	5	33	37	570	159	842	28	28	0	18	1	6	6	18	16	315	89	720	185	559	31	544	35	56	1
1286459	21.441	0	0	0	184	0	0	0	1	1	5	30	105	198	62	478	187	23	6	12	1	4	12	13	9	18	40	509	179	843	35	25	0	11	0	9	0	17	15	281	92	594	146	561	21	492	51	58	10
1287472	21.4579	0	0	0	161	0	0	0	2	1	2	27	120	259	49	455	220	23	2	6	2	2	7	12	9	23	21	566	169	874	24	13	3	11	1	7	7	23	30	299	126	638	153	575	19	522	46	50	9
1288484	21.4747	0	0	2	158	0	1	0	3	0	7	31	86	236	36	452	190	34	2	9	0	6	3	15	13	18	21	514	159	804	20	17	0	15	2	15	8	19	11	265	91	582	186	575	28	466	24	49	8
1289496	21.4916	0	1	1	175	0	1	0	3	1	5	26	102	211	41	518	210	44	0	12	0	4	11	17	11	19	24	560	147	868	32	26	1	19	1	5	9	12	17	326	77	651	174	597	30	545	35	67	6
1290508	21.5085	0	0	0	171	0	0	0	3	2	17	22	89	241	32	486	207	28	7	5	0	1	8	18	14	17	30	614	205	843	13	21	8	8	5	4	10	21	11	260	93	595	187	594	25	508	39	63	2
1291520	21.5253	0	0	1	181	0	4	1	0	1	7	32	109	215	43	535	208	36	2	3	1	4	15	14	2	16	29	584	149	940	20	17	0	24	4	1	2	10	27	274	95	712	175	606	27	493	58	70	0
1292532	21.5422	0	0	0	199	0	0	2	1	0	9	55	121	226	39	469	205	38	1	6	0	3	9	14	3	21	18	591	180	882	44	21	1	10	1	6	6	22	26	305	115	677	162	626	22	505	71	27	0
1293545	21.5591	0	1	0	202	0	1	3	3	1	6	44	103	245	33	523	222	50	4	3	2	5	8	20	10	20	44	616	166	906	25	25	0	10	2	11	5	18	19	258	88	672	165	625	13	519	60	75	3
1294557	21.5759	0	2	0	183	1	2	1	2	2	4	30	96	282	31	473	231	39	4	12	0	7	11	16	19	27	33	630	156	914	27	35	4	15	2	8	1	11	15	297	116	635	169	577	25	528	26	57	6
1295569	21.5928	0	2	0	179	1	0	2	1	1	3	47	116	256	28	459	237	50	5	4	1	9	19	15	10	27	21	610	157	889	30	39	3	10	0	7	4	16	19	281	92	608	172	620	13	508	30	52	7
1296581	21.6097	0	0	0	166	2	1	0	4	2	4	42	109	206	17	493	178	24	1	6	11	8	8	17	9	15	14	551	164	864	28	28	1	15	1	10	7	23	15	287	76	668	149	549	23	454	58	46	5
1297593	21.6266	0	0	3	178	0	2	0	5	5	1	43	109	220	45	472	212	27	2	3	1	5	4	28	8	31	18	541	144	813	14	21	2	16	2	4	2	20	17	276	69	642	136	572	19	552	44	44	12
1298606	21.6434	0	2	2	157	0	0	0	5	0	1	49	91	184	34	446	201	18	13	14	1	5	15	17	9	21	30	553	131	839	15	19	0	15	3	2	0	24	13	240	97	607	171	504	23	520	31	47	5
1299618	21.6603	0	0	2	217	0	0	0	1	2	2	42	92	252	52	456	228	18	5	3	1	1	15	22	20	20	20	496	186	777	22	25	0	23	0	11	7	22	10	266	80	670	151	555	24	486	28	56	4
1300630	21.6772	0	0	1	182	0	0	0	3	2	7	27	74	240	57	459	273	17	1	8	7	4	12	26	0	21	14	520	145	800	29	20	0	14	8	9	5	21	18	257	87	576	160	550	23	510	27	52	5
1301642	21.694	0	0	0	192	1	0	0	8	7	4	33	100	221	56	452	232	19	2	4	2	2	16	16	2	32	43	523	150	744	28	20	1	18	1	16	0	20	22	277	69	558	152	503	19	474	23	36	3
1302654	21.7109	0	2	1	208	0	0	2	6	0	3	32	92	202	27	439	249	21	3	13	2	2	6	23	11	13	25	525	171	742	38	23	1	12	1	7	3	12	18	266	50	650	122	508	20	468	19	68	11
1303666	21.7278	0	0	0	225	1	0	0	2	0	0	30	94	202	32	413	249	18	5	2	2	10	12	14	17	26	24	510	164	706	42	32	4	18	2	14	6	23	12	244	57	594	138	506	20	484	28	56	6
1304679	21.7447	0	0	1	200	0	0	0	1	1	1	22	106	206	47	429	213	28	1	6	2	5	19	19	6	21	18	491	171	722	16	37	2	16	4	9	1	19	9	266	66	571	128	496	28	484	23	58	10
1305691	21.7615	0	0	2	199	1	0	0	2	0	8	27	90	212	40	433	217	29	2	3	5	7	7	11	5	18	14	527	143	722	23	32	0	11	0	3	4	15	16	268	91	626	170	487	35	515	9	57	6
1306703	21.7784	0	1	1	203	0	1	0	0	2	8	54	108	200	41	460	216	41	0	10	2	6	15	25	10	9	19	536	142	741	19	25	4	15	2	7	14	18	21	291	65	601	138	563	28	489	27	54	3
1307715	21.7952	0	0	2	220	0	1	0	2	3	4	28	105	179	31	413	206	46	2	5	4	11	8	19	8	21	24	477	155	790	20	14	0	13	3	7	2	19	17	227	73	626	142	524	18	489	19	35	7
1308727	21.8121	0	1	1	165	0	0	3	4	3	8	24	93	149	0	364	224	47	3	5	1	10	14	17	12	19	17	467	129	690	32	21	2	12	4	10	7	15	9	250	58	575	126	525	18	492	27	45	5
1309740	21.829	0	1	5	234	0	0	4	2	5	9	45	98	194	30	379	238	29	3	3	1	14	12	19	7	23	21	458	134	718	12	26	6	9	4	9	4	17	14	249	77	563	149	508	20	506	55	44	10
1310752	21.8459	0	0	0	202	0	0	0	1	4	7	23	103	219	45	404	199	23	3	4	1	9	12	22	7	20	30	441	161	688	29	21	0	17	5	6	2	25	16	245	87	518	127	493	25	476	58	52	15
1311764	21.8627	0	1	0	209	0	0	5	2	1	4	25	88	218	62	441	237	32	2	6	0	3	7	29	6	20	15	507	112	686	53	30	2	11	14	4	19	19	11	237	65	521	147	457	16	423	54	48	8
1312776	21.8796	0	0	0	206	0	1	0	0	4	2	20	97	177	36	367	187	24	0	1	3	10	8	16	6	26	23	464	148	681	24	21	3	16	1	13	7	18	20	243	73	570	133	449	23	462	27	45	7
1313788	21.8965	0	0	0	198	0	4	0	1	4	5	15	110	195	61	388	181	29	12	4	0	0	4	11	17	18	31	432	136	669	22	12	1	16	0	5	0	4	8	246	75	523	156	463	0	481	47	55	0
1314800	21.9133	0	0	11	156	0	0	0	0	2	2	25	90	224	44	390	186	27	1	6	2	2	9	17	4	21	35	487	130	744	16	27	0	19	4	8	7	17	19	248	63	581	148	434	20	489	52	49	3
1315813	21.9302	0	1	0	192	0	2	0	5	1	3	18	129	190	35	387	226	33	0	13	2	5	14	12	9	19	21	454	129	690	26	30	1	8	2	5	10	23	14	213	84	567	122	435	24	500	38	60	8
1316825	21.9471	0	0	0	190	0	1	2	0	6	3	27	103	195	19	419	229	33	3	8	1	0	19	26	3	21	33	463	120	636	14	14	4	8	0	8	9	15	12	245	82	542	142	465	18	524	44	47	8
1317837	21.964	0	1	0	197	0	1	0	2	5	7	23	83	186	49	364	235	28	1	12	2	3	7	16	5	18	24	469	130	701	33	24	1	15	8	2	13	19	13	264	77	472	127	443	10	537	27	59	8
1318849	21.9808	0	4	2	189	0	0	0	1	6	2	36	107	179	24	424	226	22	1	13	3	3	12	39	16	14	21	432	144	660	29	35	1	21	2	4	2	25	18	239	74	499	130	425	19	489	30	50	5
1319861	21.9977	0	1	3	177	0	0	0	3	8	8	30	111	188	39	429	238	34	5	7	2	9	4	17	8	16	25	433	124	540	30	25	2	23	4	10	10	25	14	219	62	524	171	475	28	502	42	40	0
1320874	22.0146	0	2	3	175	0	3	0	3	2	2	26	96	196	30	359	212	60	2	10	2	9	16	25	7	15	22	481	139	703	18	20	3	16	2	4	2	24	11	194	58	541	129	458	31	499	53	56	10
1321886	22.0314	0	2	0	194	0	0	2	5	4	9	30	106	172	38	403	207	55	0	4	4	3	5	14	11	31	22	495	137	672	8	18	3	21	0	2	10	11	7	216	68	549	116	419	27	541	49	51	4
1322898	22.0483	0	0	2	190	0	0	0	0	3	1	19	97	195	47	394	208	28	3	7	2	2	8	22	2	24	22	446	129	710	17	16	2	14	2	3	3	19	14	246	63	532	131	414	29	521	49	37	3
1323910	22.0652	0	0	1	185	0	0	0	0	2	4	35	94	200	46	423	194	22	2	3	1	2	7	22	10	22	28	470	158	640	18	29	7	7	4	19	7	15	11	243	68	546	135	458	25	514	33	54	14
1324922	22.082	0	0	0	166	0	0	0	3	7	5	21	104	205	25	353	246	32	1	4	3	1	16	12	7	19	29	425	131	642	29	31	0	17	0	2	3	12	15	227	65	504	136	423	24	505	38	65	7
1325934	22.0989	0	0	1	203	0	1	1	3	2	2	50	106	189	20	354	236	30	2	4	2	8	8	17	9	29	27	399	156	680	22	26	0	13	2	7	7	10	19	209	70	511	107	388	16	495	41	52	9
1326947	22.1158	0	0	0	186	0	0	1	6	2	3	45	113	185	44	320	197	31	5	7	0	3	8	22	0	16	18	471	128	607	16	40	2	22	3	4	5	19	6	225	84	533	114	391	23	464	27	58	8
1327959	22.1327	0	1	0	189	0	0	1	2	1	5	26	129	174	28	400	204	34	3	12	1	4	6	15	3	21	28	480	127	624	28	24	0	21	2	5	4	20	15	286	80	531	134	437	13	492	32	53	5
1328971	22.1495	0	0	1	197	1	0	2	3	0	10	26	103	201	52	375	233	13	6	5	0	6	2	9	11	20	22	474	130	671	22	27	0	12	5	15	3	11	10	309	54	580	103	444	23	525	53	44	2
1329983	22.1664	0	0	0	203	0	0	0	9	0	3	26	140	236	23	405	241	35	2	6	0	5	7	22	7	17	22	476	125	636	21	10	3	12	0	0	6	21	20	242	76	521	130	432	22	490	41	63	7
1330995	22.1833	0	0	0	201	0	0	2	5	3	10	24	98	174	38	377	221	18	1	5	0	6	6	19	7	24	21	423	135	658	26	15	0	16	0	9	5	9	11	204	66	475	116	458	25	463	39	85	7
1332008	22.2001	0	0	1	203	0	0	0	2	2	5	32	109	178	20	334	212	39	6	6	0	3	5	18	8	14	17	513	120	648	26	27	0	17	9	7	2	16	4	243	66	541	117	424	18	461	48	65	7
1333020	22.217	0	0	0	190	2	0	0	4	1	4	29	107	220	26	384	225	48	0	6	1	5	9	21	9	18	25	424	134	607	22	24	3	8	2	5	3	25	14	255	28	521	130	449	23	488	27	51	7
1334032	22.2339	0	0	1	211	0	0	2	2	2	4	34	120	170	21	420	220	44	0	12	1	4	10	14	19	13	23	496	109	660	27	26	1	20	2	7	0	16	23	206	95	471	159	401	20	535	38	44	2
1335044	22.2507	0	0	4	198	0	0	2	1	2	6	46	103	170	15	412	208	29	2	6	0	1	7	23	10	13	18	408	120	624	20	21	2	21	3	2	4	18	22	246	73	497	110	434	30	448	27	48	6
1336056	22.2676	0	0	0	216	0	1	1	2	0	4	32	103	181	19	341	221	26	4	12	3	3	5	19	7	24	19	462	157	656	25	20	3	8	1	7	1	26	22	248	77	496	95	469	21	517	42	51	14
1337068	22.2845	0	0	0	212	1	2	0	2	5	10	30	97	217	35	399	200	27	1	8	1	7	6	18	11	19	21	444	143	603	28	22	5	10	3	6	4	16	13	206	79	480	157	397	22	473	52	55	11
1338081	22.3013	0	0	1	165	0	1	0	3	3	12	18	99	170	35	341	213	17	0	8	2	2	5	15	5	18	14	405	131	559	22	21	4	12	1	10	5	21	18	220	67	436	99	408	28	515	27	52	3
1339093	22.3182	0	5	0	195	0	0	1	3	4	6	33	106	210	35	367	223	52	0	5	0	5	6	20	7	15	19	444	136	588	28	20	4	13	1	7	2	12	15	228	53	492	118	428	18	459	26	33	2
1340105	22.3351	0	2	4	186	1	0	1	7	7	6	30	112	145	35	367	195	47	2	2	1	1	19	18	8	20	25	405	131	634	27	19	7	14	1	9	3	18	13	202	71	456	112	458	22	508	30	46	4
1341117	22.3519	0	2	1	196	0	1	0	2	4	4	19	77	182	35	329	221	43	1	6	5	6	6	17	12	18	21	421	113	610	22	21	1	19	0	7	0	24	17	236	47	508	131	418	20	494	43	30	7
1342129	22.3688	0	0	0	294	1	0	1	2	5	4	28	117	168	27	374	249	32	3	5	2	7	7	27	6	23	21	398	121	575	35	28	2	24	2	4	5	33	9	215	72	466	133	415	18	475	59	41	5
1343142	22.3857	0	0	5	188	0	0	1	0	3	4	16	109	196	18	311	192	31	2	9	3	8	10	16	4	12	30	494	123	608	29	16	0	17	7	13	8	18	26	201	73	450	130	435	23	522	44	34	14
1344154	22.4026	0	0	1	180	0	1	0	2	2	13	29	104	192	16	336	216	55	5	8	0	1	15	25	5	21	24	414	147	629	22	33	5	8	3	4	1	14	10	207	54	446	103	366	20	485	42	36	8
1345166	22.4194	0	0	3	218	0	0	0	3	2	3	34	83	173	24	361	222	18	6	16	1	1	13	24	8	22	22	388	153	613	25	29	1	9	2	5	4	25	16	188	77	501	119	395	16	448	29	65	6
1346178	22.4363	0	0	2	176	0	0	1	4	2	3	31	109	205	25	375	214	16	0	9	2	11	19	21	3	20	19	416	112	574	27	36	4	9	1	7	7	13	7	187	61	442	96	423	24	554	43	77	4
1347190	22.4532	0	0	0	178	0	0	0	2	7	5	16	125	159	34	350	205	23	1	11	0	5	8	18	9	25	29	431	122	610	20	22	0	22	2	9	1	15	13	237	66	470	105	462	20	466	53	49	6
1348202	22.47	0	1	0	181	0	0	0	3	0	4	18	119	167	25	341	230	21	1	7	0	3	5	14	15	24	14	408	113	620	21	29	1	20	6	12	3	21	19	194	63	490	109	407	31	482	54	59	2
1349215	22.4869	0	0	0	179	0	0	0	3	4	4	27	104	187	56	312	200	25	4	4	1	2	11	12	14	14	17	417	129	561	24	23	3	21	4	7	2	18	18	195	53	430	130	427	26	505	23	43	7
1350227	22.5038	0	0	3	196	0	0	0	1	0	5	50	121	168	50	368	202	44	2	5	1	2	12	22	10	16	20	423	99	613	21	33	5	21	3	6	2	23	10	194	54	474	132	418	25	496	54	61	7
1351239	22.5206	0	5	3	197	0	0	1	1	3	6	59	109	163	52	309	221	45	0	10	1	6	10	22	8	25	27	374	115	575	15	24	5	9	1	6	2	17	9	211	55	414	123	420	25	450	49	48	2
1352251	22.5375	0	1	1	216	0	0	0	5	3	4	29	83	151	40	324	206	17	0	8	1	5	7	16	8	24	25	363	99	602	32	15	1	15	0	5	6	10	10	206	76	462	123	427	24	522	19	28	10
1353263	22.5544	0	0	2	200	0	0	0	2	4	6	26	89	176	31	365	214	25	2	3	2	6	14	14	5	21	10	462	130	576	25	17	3	11	1	2	5	13	14	173	74	452	105	421	14	508	55	46	8
1354276	22.5713	0	0	0	181	0	0	0	2	1	5	18	103	149	19	312	207	31	2	7	3	10	16	28	6	19	19	396	134	588	24	33	4	14	0	8	8	23	8	200	52	469	102	418	19	524	41	59	9
1355288	22.5881	0	0	0	203	2	0	0	1	0	4	27	103	165	19	346	228	39	3	3	2	6	12	23	15	14	27	382	124	579	19	20	0	16	3	11	3	13	22	250	59	413	100	352	23	549	53	66	3
1356300	22.605	0	1	1	191	0	2	0	2	2	5	33	90	170	20	307	194	22	3	3	1	14	9	20	8	25	21	430	132	569	43	24	2	10	2	11	4	16	18	180	50	416	118	399	23	532	39	49	6
1357312	22.6219	0	5	2	200	1	2	1	4	6	3	36	126	165	42	300	212	13	0	3	1	6	6	16	13	17	19	365	113	555	21	26	0	19	1	4	3	10	9	185	52	465	104	403	21	503	49	36	13
1358324	22.6387	0	1	1	182	0	0	1	4	4	6	39	86	143	27	328	244	23	5	2	3	5	7	18	12	10	18	385	129	605	25	28	0	14	2	12	9	23	14	246	52	432	87	347	25	522	43	38	8
1359336	22.6556	0	1	0	198	1	0	0	5	2	2	23	99	151	23	276	185	21	0	5	2	7	16	22	7	25	18	363	105	529	19	25	3	9	3	5	1	19	10	221	47	446	98	342	31	476	29	45	8
1360349	22.6725	0	0	0	225	0	0	1	6	6	6	19	95	157	22	325	195	24	4	9	2	8	10	20	6	28	27	397	102	604	26	24	0	10	4	12	9	15	13	205	66	405	107	404	18	536	22	44	11
1361361	22.6894	0	0	0	197	0	0	0	1	4	6	32	88	156	27	266	218	22	0	24	3	9	12	27	2	27	29	351	98	564	25	24	2	7	3	5	0	24	7	164	58	456	98	422	18	525	22	56	2
1362373	22.7062	0	0	0	196	0	1	0	4	1	1	25	120	144	30	325	200	29	0	10	6	2	7	25	5	16	15	365	79	601	20	24	2	14	1	8	13	9	8	173	66	386	116	341	14	512	33	77	6
1363385	22.7231	0	0	3	187	0	5	0	2	4	5	27	85	173	16	294	228	31	3	12	1	6	5	16	7	23	10	376	85	509	16	24	4	22	3	5	5	17	16	195	48	396	98	387	19	501	51	49	5
1364397	22.74	0	0	0	230	0	0	2	0	0	4	24	74	137	18	320	242	20	2	10	1	4	13	14	11	11	17	300	100	538	27	37	4	11	0	6	12	13	10	223	57	406	101	363	25	546	53	50	2
1365410	22.7568	0	4	1	214	0	1	0	1	2	9	16	90	162	27	286	200	27	2	9	1	4	3	22	14	16	21	341	110	497	16	17	1	20	3	6	6	6	14	200	48	403	103	388	24	520	56	56	4
1366422	22.7737	0	0	2	201	0	1	1	7	3	11	19	98	144	23	280	227	20	1	5	5	7	9	13	4	13	26	399	106	535	28	40	0	13	6	7	0	15	18	162	58	396	124	354	12	530	47	42	1
1367434	22.7906	0	0	0	181	0	1	0	1	0	2	18	115	147	20	302	233	31	2	11	1	11	10	11	10	22	15	339	111	516	35	26	0	7	0	2	12	17	18	182	47	372	107	372	11	531	46	42	8
1368446	22.8074	0	0	2	197	0	4	0	4	3	6	30	84	165	27	318	237	45	4	5	1	2	10	18	8	21	16	316	120	498	27	21	0	21	0	13	2	12	15	203	76	451	110	350	11	482	44	45	13
1369458	22.8243	0	0	1	185	0	0	0	7	0	11	21	120	134	19	327	220	46	3	8	3	1	7	12	8	29	34	402	108	475	16	28	3	5	3	2	2	16	9	171	66	476	102	367	22	510	38	66	3
1370470	22.8412	0	0	1	166	0	0	0	2	3	7	38	104	158	21	293	214	47	0	5	1	10	11	24	8	23	18	343	111	507	25	28	2	18	10	1	8	15	9	160	32	388	125	407	18	530	37	63	7
1371483	22.858	0	0	0	196	0	0	0	2	2	17	33	120	156	14	284	212	25	0	6	1	2	13	19	4	19	18	360	95	525	12	23	3	19	3	9	4	12	10	191	32	389	88	374	16	491	29	62	13
1372495	22.8749	0	0	1	191	1	2	1	7	5	3	21	113	165	17	293	203	31	5	7	6	5	8	17	13	23	22	356	114	491	29	30	1	6	3	1	12	15	5	171	55	432	79	348	35	510	52	52	12
1373507	22.8918	0	0	1	184	0	0	1	4	3	6	14	100	166	27	317	241	33	5	10	0	3	10	23	14	22	21	358	81	496	30	25	6	9	0	1	2	12	6	175	45	372	122	372	21	530	55	37	16
1374519	22.9087	0	2	1	193	0	0	0	4	8	3	23	105	152	30	295	212	22	0	14	2	4	11	25	5	29	22	350	85	522	24	20	0	11	1	10	5	21	19	161	54	438	97	340	11	511	33	49	12
1375531	22.9255	0	0	1	207	1	5	0	3	3	8	27	102	152	2	307	232	20	0	6	2	3	1	26	7	13	26	333	106	489	24	23	0	23	1	7	4	13	9	180	56	369	103	350	21	517	33	38	6
1376544	22.9424	0	0	0	186	0	1	1	2	4	7	30	84	151	33	273	204	36	4	7	2	2	10	18	8	16	22	309	99	540	23	21	3	11	8	8	5	18	11	172	47	404	92	391	17	480	49	23	11
1377556	22.9593	0	0	0	213	0	5	1	3	0	5	33	93	159	19	285	210	18	0	5	2	4	7	25	21	12	14	358	108	428	21	19	1	24	6	9	7	4	10	209	50	388	97	346	17	509	43	14	4
1378568	22.9761	0	0	2	179	0	0	2	0	0	3	15	111	174	31	319	231	47	4	9	1	7	10	16	7	19	17	360	86	519	24	34	3	12	5	10	3	19	10	178	22	424	104	333	26	503	40	48	6
1379580	22.993	0	0	2	218	0	0	2	1	4	9	38	99	140	25	326	203	34	3	5	0	2	6	19	7	19	24	396	83	500	19	23	4	12	2	9	4	17	7	181	29	364	117	412	16	522	44	48	4
1380592	23.0099	0	1	2	182	0	1	1	2	4	11	40	99	116	28	271	257	26	1	10	3	9	8	13	6	16	18	306	90	530	18	37	0	18	4	4	1	19	7	176	49	395	94	326	28	533	50	55	7
1381604	23.0267	0	0	0	241	1	5	0	2	5	5	22	125	152	24	264	207	15	2	6	0	3	6	20	7	17	13	344	104	549	20	25	0	21	0	2	7	9	9	170	51	407	105	336	11	537	39	45	8
1382617	23.0436	0	0	0	159	1	0	0	2	5	7	25	106	128	23	274	190	23	0	11	2	5	9	15	3	24	24	324	101	481	20	23	2	8	2	3	5	12	4	169	39	388	108	327	23	500	41	26	24
1383629	23.0605	0	0	0	198	0	0	6	1	0	9	31	108	153	23	293	208	30	1	4	3	2	14	23	16	21	20	352	99	460	30	44	1	10	0	11	3	13	10	185	28	402	106	328	19	506	66	33	6
1384641	23.0773	0	0	0	196	0	0	1	2	3	5	21	87	129	21	297	244	32	0	7	1	4	10	12	9	10	13	360	117	463	15	24	2	17	3	6	5	10	16	198	46	398	124	337	21	502	48	41	9
1385653	23.0942	0	0	1	190	0	3	0	2	0	9	29	110	131	16	291	295	25	0	6	0	2	13	9	8	19	23	363	115	447	15	19	7	14	0	8	3	19	8	148	48	370	103	344	22	513	42	57	4
1386665	23.1111	0	1	0	193	0	0	0	0	0	7	22	111	157	22	301	187	28	2	7	1	10	14	14	2	12	24	323	120	519	32	25	2	12	0	4	15	11	10	204	54	359	97	301	17	563	51	62	9
1387678	23.128	0	0	0	192	0	4	0	0	4	2	26	116	139	28	280	201	27	0	3	1	5	7	14	5	24	15	295	79	499	17	23	3	14	3	6	10	20	9	153	73	377	90	296	22	541	40	64	8
1388690	23.1448	0	5	0	188	0	2	0	2	1	1	24	88	131	31	289	233	26	3	8	0	5	10	16	6	24	12	367	97	465	25	27	2	12	1	12	3	18	9	161	45	365	84	351	21	464	70	52	7
1389702	23.1617	0	0	0	220	0	1	0	6	3	6	25	103	121	20	275	219	18	5	7	4	2	8	11	5	31	20	309	94	489	21	21	9	14	7	8	1	11	12	191	34	391	96	322	34	520	47	46	5
1390714	23.1786	0	2	2	200	0	2	0	0	4	1	29	95	146	28	266	251	23	0	5	1	1	7	9	6	27	16	332	78	443	20	34	2	18	3	5	8	12	7	136	37	397	99	272	16	514	43	71	10
1391726	23.1954	0	0	1	221	0	0	0	2	2	5	24	114	155	17	291	221	25	7	9	1	6	10	15	9	16	15	318	90	434	24	21	0	14	1	5	6	9	5	169	37	390	94	279	18	487	38	60	3
1392738	23.2123	0	0	3	211	0	0	0	0	1	5	30	116	123	21	273	206	28	5	9	0	1	11	15	9	17	22	304	84	416	15	39	1	5	0	1	0	12	16	189	25	396	92	371	24	485	43	57	8
1393751	23.2292	0	0	1	184	0	0	0	0	3	4	21	96	121	30	293	202	16	1	3	0	3	10	14	8	13	10	289	80	488	21	27	4	14	1	3	6	12	4	158	28	366	85	314	24	507	46	62	5
1394763	23.2461	0	3	1	201	0	1	0	0	4	7	14	102	124	26	279	222	25	8	8	0	6	20	20	12	19	19	315	89	438	18	14	1	12	2	4	3	17	22	183	30	380	71	333	19	464	71	65	7
1395775	23.2629	0	5	0	211	0	0	1	1	2	2	25	91	141	12	257	225	39	6	9	1	5	5	19	10	13	21	341	101	427	15	20	5	19	7	6	5	9	8	177	35	367	75	278	9	496	52	46	8
1396787	23.2798	0	0	1	156	0	0	1	1	0	4	21	94	117	41	265	249	37	7	7	1	1	9	18	8	16	15	313	102	483	18	27	9	20	1	9	7	12	16	154	55	354	84	305	22	517	45	40	10
1397799	23.2966	0	2	1	170	0	0	1	5	1	1	27	103	151	44	285	205	25	0	1	2	6	8	17	6	22	21	332	104	500	23	18	3	17	5	2	5	19	8	168	50	358	102	342	18	478	58	32	15
1398812	23.3135	0	0	1	201	1	0	0	2	4	6	29	84	144	20	320	223	39	2	13	1	9	9	14	7	17	24	256	89	479	23	30	2	8	2	2	5	31	14	180	38	415	96	347	26	547	45	26	6
1399824	23.3304	0	0	4	186	0	1	2	5	2	2	26	103	149	18	256	200	26	5	7	0	12	11	11	6	15	17	320	102	417	21	11	4	9	4	4	1	26	7	169	25	326	73	315	23	484	36	32	4
1400836	23.3473	0	4	0	168	1	0	0	1	3	6	28	125	129	28	266	225	12	2	8	1	1	13	19	10	17	23	297	102	418	30	33	4	16	1	0	3	17	8	156	44	376	95	330	23	486	60	33	16
1401848	23.3641	0	1	1	179	0	0	1	1	5	8	33	90	131	19	290	203	26	2	2	2	9	6	19	4	14	21	278	93	464	23	16	1	19	6	11	2	12	23	168	47	360	92	330	25	487	48	53	6
1402860	23.381	0	2	2	191	0	0	0	2	3	1	20	101	140	27	275	193	20	0	6	1	0	9	25	7	23	13	307	82	446	24	44	2	9	0	4	6	7	9	151	55	380	102	302	16	480	75	58	2
1403872	23.3979	0	0	1	187	0	2	3	1	4	7	18	106	141	53	256	218	43	5	6	2	4	16	17	9	11	14	325	72	459	31	25	1	17	11	2	8	18	3	197	52	336	84	295	12	450	23	52	6
1404885	23.4148	0	0	0	170	1	1	1	0	0	11	38	96	121	21	302	210	58	6	3	1	6	4	18	10	13	17	353	95	405	14	29	2	11	5	13	0	19	7	164	42	405	97	308	8	488	29	63	10
1405897	23.4316	0	0	2	181	0	0	0	3	5	3	27	106	113	34	268	232	42	2	2	0	7	12	19	8	15	25	332	102	474	17	23	5	15	3	3	10	14	14	151	52	321	91	318	18	505	42	51	12
1406909	23.4485	0	0	0	182	0	0	1	1	3	3	15	111	114	38	277	235	19	2	12	0	5	4	30	1	14	18	400	102	494	23	15	1	13	11	3	5	16	10	175	49	382	74	330	26	487	41	66	11
1407921	23.4654	0	0	0	206	0	2	2	3	3	10	30	103	129	30	214	237	6	3	5	2	5	9	19	4	19	23	323	105	424	16	21	7	26	1	3	3	24	8	165	44	322	106	296	20	560	49	55	6
1408933	23.4822	0	1	0	229	1	3	0	0	2	3	18	109	106	36	288	199	25	3	7	0	6	13	22	5	20	14	281	84	420	13	22	3	30	0	3	6	10	7	154	38	337	81	299	20	504	51	51	11
1409946	23.4991	0	1	0	180	0	3	0	4	6	3	20	88	136	14	250	222	31	0	9	3	9	8	13	11	15	22	343	66	448	16	17	2	18	3	8	3	15	15	171	43	372	81	296	28	513	38	44	8
1410958	23.516	0	0	3	189	0	3	0	2	0	2	27	98	160	32	252	219	38	3	9	1	3	13	18	13	12	19	314	103	443	19	25	0	10	2	8	7	8	13	166	48	301	76	345	14	540	60	46	14
1411970	23.5328	0	0	2	213	1	0	0	2	5	7	0	96	111	23	259	217	35	4	7	1	6	5	19	9	17	11	323	81	429	10	21	3	9	0	5	8	22	24	146	55	364	83	310	12	579	65	48	11
1412982	23.5497	0	0	1	215	0	0	0	3	6	1	21	101	137	28	264	184	35	3	8	5	12	6	14	3	18	24	344	116	452	25	26	5	14	2	9	6	13	14	146	30	343	114	317	18	491	42	49	10
1413994	23.5666	0	0	1	199	0	3	2	1	3	4	37	124	116	22	256	208	28	5	7	2	10	10	15	2	20	17	315	81	497	17	23	1	25	3	5	3	17	8	156	21	381	91	338	25	512	33	16	14
1415007	23.5834	0	0	3	171	0	3	2	1	11	5	21	104	108	23	246	239	28	1	5	1	11	15	23	9	12	29	265	103	427	23	27	8	21	8	5	3	13	15	188	39	343	92	301	18	535	17	48	0
1416019	23.6003	0	0	0	201	0	1	2	5	6	6	34	125	140	26	238	235	18	1	11	3	1	14	24	5	19	18	314	103	438	21	37	1	11	0	2	5	8	14	148	49	380	87	330	20	510	28	58	6
1417031	23.6172	0	0	0	185	0	1	3	6	3	4	25	92	144	27	250	236	24	0	6	2	4	4	25	11	22	17	292	72	427	21	35	5	6	0	3	8	21	9	174	38	347	76	288	22	493	40	54	7
1418043	23.634	0	0	3	207	0	1	1	0	2	14	11	104	158	17	267	188	23	1	5	2	9	5	12	6	14	10	308	72	403	16	22	5	13	4	6	2	15	6	165	18	338	87	316	25	516	50	37	4
1419055	23.6509	0	0	1	211	1	1	0	2	1	7	25	99	110	26	255	219	39	5	10	4	7	6	14	11	12	26	264	82	459	14	20	1	12	3	7	2	24	11	156	24	263	74	284	13	538	56	27	12
1420067	23.6678	0	0	1	223	0	0	8	0	2	1	32	100	113	31	269	192	38	2	11	6	8	11	16	10	10	20	283	88	447	21	29	2	8	0	7	3	9	10	146	56	310	101	300	25	508	35	22	13
1421080	23.6847	0	0	3	180	0	0	0	3	2	5	24	112	138	16	251	220	23	4	5	3	1	7	12	6	19	21	257	84	418	23	21	8	17	7	6	2	11	8	153	51	298	90	250	15	545	39	37	7
1422092	23.7015	0	0	5	202	0	3	0	3	0	3	23	94	139	20	223	233	39	0	1	0	9	11	9	5	18	18	260	76	437	9	22	4	12	1	5	6	12	18	126	41	335	93	287	12	472	47	73	3
1423104	23.7184	0	0	5	217	0	0	0	0	1	6	22	115	132	30	240	220	40	0	7	2	5	23	18	13	13	14	299	68	418	16	32	4	14	1	7	7	6	23	139	36	279	95	281	15	512	51	51	13
1424116	23.7353	0	0	1	204	0	0	0	0	9	3	27	104	156	21	249	251	46	4	2	6	11	12	19	10	10	9	264	82	399	23	30	7	10	1	3	7	9	13	154	25	327	77	253	16	530	51	61	6
1425128	23.7521	0	1	1	186	0	1	0	1	13	2	24	107	142	22	223	207	29	6	17	0	6	10	15	5	18	19	283	88	430	18	30	2	8	4	8	2	13	16	155	36	327	96	278	27	491	31	64	10
1426141	23.769	0	2	0	202	0	2	0	5	0	5	18	92	93	40	219	246	19	0	10	2	3	3	16	7	26	17	301	64	429	35	18	1	17	2	9	1	23	0	174	37	321	70	270	12	559	41	42	10
1427153	23.7859	0	0	0	181	1	1	3	4	3	1	25	105	113	21	208	236	36	5	10	0	2	11	23	9	21	12	273	89	381	15	25	4	16	7	9	1	22	12	119	33	318	82	292	15	493	37	39	6
1428165	23.8027	0	0	2	173	0	2	3	4	2	9	34	109	128	22	213	209	29	0	7	0	3	8	16	6	16	10	250	85	386	16	24	0	12	5	5	2	7	16	143	25	335	93	244	21	534	48	26	7
1429177	23.8196	0	0	2	193	0	1	0	1	2	9	25	97	122	26	214	205	35	4	7	1	3	10	14	12	19	29	264	103	383	17	45	5	19	1	5	11	8	0	145	17	309	94	222	19	525	41	51	2
1430189	23.8365	0	0	1	176	0	4	1	3	3	5	27	100	113	23	249	202	19	1	5	0	4	5	13	11	18	19	241	63	368	20	23	6	18	0	11	1	13	10	172	45	323	76	255	6	462	49	42	4
1431201	23.8533	0	3	0	205	0	0	2	3	3	9	37	113	120	21	182	236	26	1	13	3	3	4	16	6	19	26	284	65	401	23	23	0	17	6	7	6	13	15	151	44	247	68	281	13	494	56	41	6
1432214	23.8702	0	0	3	206	0	0	0	4	4	8	32	105	124	25	227	234	23	1	6	0	6	3	18	6	19	16	286	92	438	21	26	2	10	0	3	6	9	6	137	60	338	74	288	25	513	25	68	9
1433226	23.8871	0	0	1	178	0	1	1	1	0	2	27	113	108	32	262	232	34	2	8	0	5	8	13	6	21	18	279	60	387	19	27	5	21	7	6	7	17	6	145	49	311	80	279	18	564	21	53	6
1434238	23.904	0	0	4	202	0	0	0	3	1	8	27	98	112	27	215	219	23	3	9	1	5	5	22	8	23	28	258	79	361	15	32	1	4	6	5	7	17	14	153	14	284	86	268	11	501	53	33	4
1435250	23.9208	0	0	0	191	0	0	0	0	3	3	18	99	114	29	239	264	22	3	8	4	9	9	20	9	17	11	281	99	399	30	32	1	18	3	9	2	19	13	176	30	324	85	257	20	486	54	57	4
1436262	23.9377	0	0	0	187	1	0	0	0	0	14	18	78	114	23	216	191	50	2	8	0	6	5	18	8	18	17	253	52	381	20	28	6	12	1	5	2	14	12	142	19	312	79	239	16	525	60	50	7
1437275	23.9546	0	0	2	194	0	0	2	1	4	4	32	88	110	15	234	238	26	2	7	1	7	14	13	6	7	24	234	59	403	20	22	15	7	2	10	4	20	3	146	16	322	70	263	15	554	59	46	10
1438287	23.9715	0	0	0	198	4	1	0	2	1	6	25	86	124	23	245	224	17	1	6	4	8	8	25	15	14	16	289	69	420	21	26	2	14	3	3	8	13	7	160	23	288	61	267	13	539	38	46	5
1439299	23.9883	0	0	0	217	1	0	0	1	4	2	39	119	99	18	233	193	21	2	10	2	4	9	17	8	16	11	302	69	396	13	21	2	16	0	8	8	22	11	141	24	288	84	288	28	476	40	49	11
1440311	24.0052	0	1	2	191	0	0	0	3	2	2	45	102	122	25	210	222	32	2	10	1	13	6	17	5	11	16	226	63	388	16	16	0	20	1	6	4	9	12	117	25	335	87	245	11	507	49	68	9
1441323	24.0221	0	0	0	196	0	0	0	1	3	3	21	89	116	27	195	212	20	5	11	10	5	5	25	2	21	15	267	76	368	25	15	2	13	4	3	7	18	10	135	30	297	81	277	11	516	63	46	6
1442335	24.0389	0	0	0	209	0	0	1	2	0	9	24	82	113	11	196	224	26	4	7	2	1	12	22	8	25	19	271	88	387	20	28	4	14	0	11	0	29	16	135	16	320	92	242	17	515	44	43	2
1443348	24.0558	0	1	0	180	1	0	0	1	1	8	20	92	107	23	230	241	39	4	6	1	5	6	20	11	20	15	246	75	376	25	14	1	14	2	8	4	13	17	132	27	301	88	281	18	475	42	31	10
1444360	24.0727	0	0	2	218	1	0	0	3	3	4	27	95	121	23	200	236	44	4	6	1	7	15	14	17	26	10	240	82	350	21	24	6	12	0	9	4	15	8	136	18	299	86	255	13	543	25	52	0
1445372	24.0895	0	0	2	213	0	1	0	1	2	7	33	93	99	17	221	205	41	5	5	1	5	3	22	4	25	27	240	75	322	15	33	3	14	1	1	8	28	13	150	25	300	40	265	20	542	30	54	4
1446384	24.1064	0	0	0	191	0	1	2	1	4	9	33	87	109	23	218	216	30	1	11	3	8	14	23	21	17	9	254	78	319	11	37	6	16	8	10	1	13	9	103	26	281	49	229	15	501	37	18	6
1447396	24.1233	0	2	1	197	0	0	1	0	0	9	30	97	108	25	244	205	36	10	8	2	6	15	18	5	18	13	292	69	376	14	22	9	7	1	15	1	14	7	108	40	247	63	268	16	509	33	60	11
1448409	24.1401	0	0	1	161	0	0	1	2	2	2	23	86	111	19	227	188	22	1	12	2	7	13	12	9	16	14	291	45	392	14	30	6	18	3	3	8	13	11	148	26	284	89	232	13	455	52	65	6
1449421	24.157	0	1	1	220	0	4	0	2	1	5	24	94	88	12	226	235	26	3	13	3	4	6	8	8	12	13	235	70	376	13	19	0	10	1	3	8	12	11	107	24	276	83	241	15	487	35	35	4
1450433	24.1739	0	0	3	223	0	2	0	4	2	0	27	86	109	12	207	214	28	3	11	5	1	10	21	3	10	22	250	101	363	28	16	2	20	2	7	3	20	10	158	24	256	78	264	13	504	23	37	9
1451445	24.1908	0	0	4	212	0	1	0	1	4	6	22	92	100	21	231	237	25	1	6	4	3	8	19	4	18	19	292	80	341	19	23	5	23	9	5	3	21	8	144	26	283	56	219	17	511	60	48	7
1452457	24.2076	0	0	0	202	0	3	2	3	4	5	34	99	118	14	191	237	28	1	9	1	8	5	19	8	11	15	255	59	299	12	29	1	16	6	17	4	10	13	142	23	274	57	219	26	504	53	43	15
1453469	24.2245	0	0	1	203	2	1	0	1	7	9	33	117	115	16	218	219	23	7	8	5	6	14	8	1	6	17	249	82	363	15	21	1	15	2	12	6	18	10	147	28	290	72	273	19	484	29	60	4
1454482	24.2414	0	0	5	186	0	0	0	3	3	7	19	101	113	25	228	241	37	3	13	6	4	12	13	6	8	20	232	68	333	18	23	5	20	2	4	11	17	14	125	19	326	83	215	21	491	24	51	7
1455494	24.2582	0	0	0	184	3	2	0	2	4	5	21	108	113	24	207	211	47	7	6	3	4	3	19	3	12	22	253	78	373	24	25	2	18	0	16	6	3	13	115	16	280	79	255	19	523	65	46	10
1456506	24.2751	0	0	0	190	0	0	0	6	3	4	22	106	120	26	256	231	46	3	7	2	8	13	20	3	3	12	240	63	381	20	18	4	21	6	9	7	25	14	109	18	313	61	244	8	524	58	41	4
1457518	24.292	0	0	2	180	0	0	1	2	0	4	23	93	109	28	214	212	27	3	3	7	7	7	17	10	11	18	239	79	336	19	27	5	14	7	2	4	11	0	130	26	263	92	200	0	485	30	42	6
1458530	24.3088	0	0	8	199	0	0	0	0	5	5	28	96	84	36	222	236	22	0	7	2	2	10	20	13	18	15	187	50	376	21	19	7	15	1	5	5	21	13	113	30	301	83	249	23	487	15	20	9
1459543	24.3257	0	0	1	230	2	2	0	3	2	3	22	106	109	14	227	189	25	5	8	2	4	12	13	7	10	21	249	63	319	15	30	2	6	5	5	4	12	7	105	24	283	60	267	22	501	28	44	13
1460555	24.3426	0	0	1	228	0	0	1	2	1	5	36	96	107	34	211	199	23	3	7	0	5	5	23	11	12	11	205	94	335	16	34	3	3	3	5	8	11	12	139	40	288	74	202	12	561	42	53	7
1461567	24.3594	0	0	0	179	0	2	0	9	6	4	20	92	98	27	194	206	18	2	4	4	4	5	21	5	10	11	258	74	376	20	27	2	13	1	5	0	18	15	128	30	290	69	232	24	499	33	43	4
1462579	24.3763	0	0	0	167	0	0	1	1	0	3	25	114	108	13	200	227	24	2	8	2	8	9	9	7	18	11	239	66	386	13	25	0	10	2	11	3	11	12	138	22	274	57	237	18	521	31	47	3
1463591	24.3932	0	0	2	179	0	0	2	4	3	3	16	91	122	24	199	207	47	2	1	3	9	10	7	5	7	21	244	81	355	22	24	5	21	6	9	1	16	9	136	22	264	73	269	9	470	31	44	8
1464603	24.41	0	1	7	217	1	0	1	0	0	7	30	113	103	17	220	249	44	3	2	5	2	9	15	6	23	16	213	74	372	16	23	4	24	2	3	5	12	10	122	16	285	58	255	8	490	53	62	3
1465616	24.4269	0	0	1	227	0	1	0	5	8	2	14	96	119	17	235	226	12	2	11	2	2	17	19	7	12	18	252	60	355	24	28	1	12	3	2	7	13	11	146	22	269	69	262	23	501	53	80	6
1466628	24.4438	0	0	0	207	0	0	0	3	1	3	23	131	111	20	191	238	27	7	7	1	6	5	16	9	16	25	246	84	360	15	24	2	5	0	6	6	15	3	130	26	264	71	208	14	496	57	57	11
1467640	24.4607	0	1	1	190	0	1	2	1	1	3	23	84	108	19	201	214	24	7	8	4	9	9	22	7	12	22	256	64	349	17	31	0	14	3	8	2	14	9	111	25	253	70	184	21	489	52	63	11
1468652	24.4775	0	1	0	218	0	2	0	1	1	6	29	91	114	21	208	250	34	0	8	2	4	19	15	9	11	13	225	67	336	19	29	0	19	0	4	2	9	15	155	18	265	61	209	18	502	45	49	7
1469664	24.4944	0	0	6	200	0	0	0	0	0	5	22	95	116	25	223	234	28	4	9	1	6	14	12	4	14	22	219	66	339	15	23	3	10	0	6	3	10	13	126	22	264	59	205	17	516	47	50	2
1470677	24.5113	0	0	0	186	0	0	1	1	1	9	30	130	100	18	199	229	35	0	4	2	12	4	16	14	6	10	238	67	314	24	21	3	16	2	5	3	8	3	155	24	267	51	190	11	466	43	44	9
1471689	24.5282	0	0	3	255	0	0	1	5	1	1	28	90	102	20	210	213	43	5	5	1	6	12	16	8	17	14	231	74	353	14	17	8	15	0	9	1	9	4	113	14	240	75	235	10	538	53	43	3
1472701	24.545	0	0	2	205	0	0	0	0	4	7	24	99	107	17	176	235	36	3	7	4	7	8	17	4	18	12	252	53	297	16	23	4	11	1	9	6	15	8	131	26	278	89	240	17	536	30	54	8
1473713	24.5619	0	3	0	198	1	1	0	2	4	2	32	94	111	16	203	241	19	2	6	2	1	16	20	10	22	22	210	73	323	14	27	0	11	3	4	5	16	10	103	24	255	83	225	10	449	42	61	10
1474725	24.5787	0	1	3	190	0	0	3	2	3	5	18	114	83	25	179	222	30	3	6	1	8	12	18	7	20	14	216	69	279	13	26	4	10	3	5	3	19	19	124	23	263	78	216	14	472	42	56	7
1475737	24.5956	0	1	1	207	0	0	0	3	3	6	20	99	133	18	166	215	24	3	13	2	3	9	18	7	10	23	183	63	289	26	28	3	12	0	6	5	19	8	100	35	259	70	196	0	504	42	47	3
1476750	24.6125	0	0	0	203	0	0	0	2	1	1	24	101	104	31	198	258	30	5	5	0	7	7	21	5	7	15	217	52	367	15	23	4	15	1	8	8	5	0	134	44	248	61	232	11	479	56	46	9
1477762	24.6294	0	2	0	180	0	0	0	2	4	6	29	107	102	21	186	192	38	0	4	2	2	15	15	9	11	17	217	82	314	16	33	3	15	3	7	5	14	8	134	54	251	44	189	17	482	51	57	8
1478774	24.6462	0	0	1	187	1	0	1	0	3	5	29	113	114	18	202	213	43	4	4	3	3	9	11	7	21	11	210	59	314	18	24	2	7	2	4	7	13	12	137	28	256	57	222	9	560	35	67	6
1479786	24.6631	0	0	0	205	3	3	0	7	3	2	21	106	117	24	163	221	23	2	6	4	11	9	17	18	16	17	235	70	314	14	19	3	14	0	7	0	16	15	98	30	250	67	221	9	489	27	52	5
1480798	24.68	0	0	8	231	0	0	1	2	2	4	27	93	97	21	182	231	30	0	4	3	7	10	15	4	22	12	271	69	298	12	31	3	12	4	0	3	10	13	102	26	267	63	236	12	572	22	50	15
1481811	24.6969	0	0	1	186	0	0	0	0	1	4	29	110	112	20	202	210	28	1	8	2	2	13	20	5	15	24	204	81	356	13	21	2	13	4	9	4	22	8	129	29	244	66	278	11	550	44	67	12
1482823	24.7137	0	0	2	200	2	0	0	1	3	4	30	105	101	25	186	194	27	0	6	1	4	14	21	7	11	16	202	79	324	17	30	0	10	1	3	8	16	4	112	42	279	53	236	11	508	57	73	6
1483835	24.7306	0	0	0	203	3	0	0	1	2	5	30	118	82	14	180	209	32	0	6	0	1	5	14	10	18	22	212	62	336	25	39	1	11	6	3	5	5	22	146	36	245	70	210	25	531	57	77	9
1484847	24.7475	0	0	3	211	0	3	0	3	0	5	26	113	100	20	179	231	23	7	12	0	11	6	14	7	14	8	206	88	333	19	24	5	14	2	1	1	6	12	118	25	244	54	234	17	606	47	54	10
1485859	24.7643	0	0	1	217	0	3	1	1	1	8	26	111	117	16	193	187	15	2	16	5	10	12	17	20	17	13	206	53	350	17	22	1	11	0	19	7	13	22	114	27	294	70	200	11	513	53	44	10
1486871	24.7812	0	3	0	201	0	0	2	1	1	4	19	101	106	17	199	226	21	6	10	3	1	11	20	10	7	14	246	56	298	12	34	0	11	1	9	9	8	4	104	27	264	59	236	24	438	72	29	4
1487884	24.7981	0	0	1	222	0	4	0	1	0	6	27	92	90	24	185	235	40	4	5	1	7	10	23	12	12	9	181	65	326	20	37	4	13	0	4	7	13	5	126	34	234	50	182	17	544	43	32	2
1488896	24.8149	0	2	1	199	0	0	1	1	4	9	17	117	106	16	184	207	13	6	10	5	2	7	24	8	8	21	198	64	291	13	38	1	5	7	9	4	15	8	116	46	263	79	223	16	471	42	26	9
1489908	24.8318	0	0	0	179	0	0	1	2	2	5	24	116	75	0	203	204	25	3	2	0	4	10	19	1	14	7	248	79	316	16	22	3	20	1	7	4	16	9	103	31	286	66	243	13	511	46	32	4
1490920	24.8487	0	0	3	207	0	0	0	4	0	10	23	127	99	30	161	207	38	2	7	0	3	6	24	2	8	18	214	58	331	17	27	10	14	2	5	2	21	6	113	24	205	44	190	16	470	23	57	3
1491932	24.8655	0	0	0	224	2	0	1	2	3	6	23	101	85	22	157	249	49	2	7	0	12	13	16	8	18	36	209	42	283	11	20	9	10	2	1	0	8	8	124	25	244	62	196	15	577	21	48	7
1492945	24.8824	0	1	0	201	0	0	2	2	1	15	30	96	97	29	183	188	24	2	3	5	8	10	20	6	19	9	240	64	299	22	31	0	11	4	8	4	14	6	123	15	226	56	253	14	506	33	48	8
1493957	24.8993	0	1	0	205	1	1	4	0	5	7	25	119	102	20	158	238	17	3	3	4	2	7	25	12	14	12	226	45	364	12	26	4	15	3	4	4	7	11	104	47	217	72	204	19	568	54	62	0
1494969	24.9161	0	5	5	203	0	0	0	6	5	12	31	101	94	32	194	248	31	4	7	0	2	12	22	2	14	13	240	65	356	10	38	2	11	9	5	2	7	7	98	30	247	42	226	13	548	50	42	4
1495981	24.933	0	0	0	231	0	0	0	2	1	3	20	97	78	23	183	194	17	5	6	4	8	7	23	7	7	15	254	70	344	18	31	2	10	0	5	6	11	9	82	24	249	72	253	17	442	61	63	6
1496993	24.9499	0	0	2	206	2	3	0	2	2	6	22	99	97	30	190	234	18	6	7	1	7	13	18	8	5	13	199	56	327	17	24	3	12	3	1	2	14	12	129	49	244	55	236	15	512	66	76	6
1498005	24.9668	0	0	0	215	0	0	1	2	1	0	25	90	83	21	178	226	22	3	12	1	5	11	23	6	18	7	211	51	307	29	14	3	12	0	9	3	7	4	145	34	240	48	248	12	498	44	65	5
[truncated: 724 more columns]
