# Supplementary material for: Sustainable solvent extraction of gold and other metals with biomass chemicals
Source: Royal Society of Chemistry journal article supplement (doi:10.1039/d3su00078h), 2024-01-01
Supplement: d3su00078h5.pdf [file d3su00078h5.pdf]

List of symbols for the gold paper

| Symbol     | Meaning                                                                                                                                                                                                              |
|------------|----------------------------------------------------------------------------------------------------------------------------------------------------------------------------------------------------------------------|
| $D_M$      | Distribution ratio of metal M. Defined as the total concentration (all chemical forms) of an element in the organic phase divided by the total concentration in the aqueous phase                                    |
| $\phi_r$   | The fraction of a metal lost to the raffinate from a counter current extraction battery                                                                                                                              |
| P          | The mathematical product of the distribution ratio and the organic to aqueous volume ratio                                                                                                                           |
| $SF_{A/B}$ | Separation factor of A over B, defined as $D_A / D_B$                                                                                                                                                                |
| ppm        | Parts per million, often in milligrams per litre or milligrams per kilo.                                                                                                                                             |
| $DF_{A/B}$ | Decontamination factor of a process. Defined as $([A]_{product}[B]_{feed}) / ([A]_{feed}[B]_{product})$                                                                                                              |
| $K_n$      | Thermodynamic stability constant of a complex                                                                                                                                                                        |
| $K_A$      | Dissociation constant for an acid                                                                                                                                                                                    |
| $K_{ex}$   | Extraction constant, this is a thermodynamic constant. Depending on the mechanism of extraction its units will vary.                                                                                                 |
| k          | Extraction constant which is a kinetic constant.                                                                                                                                                                     |
| $K_D$      | Partition constant. Defined as the activity of a species in the organic phase divided by the activity in the aqueous phase. Normally used in this paper for describing the partition of an extractant.               |
| [X]        | Concentration of X in moles per litre ( $dm^3$ )                                                                                                                                                                     |
| $f_x$      | Activity function of X, activity function is for when concentrations are in moles per litre                                                                                                                          |
| U          | A constant which contains activities in the organic phase and the concentration of the extractant in the organic phase                                                                                               |
| A          | The linear part of the polynomial in a Pitzer equation, units are $mol^{-1} dm^3$                                                                                                                                    |
| B          | The quadratic part of the polynomial in a Pitzer equation, units are $mol^{-2} dm^6$                                                                                                                                 |
| $\beta_n$  | Cumulative thermodynamic stability constant for a complex                                                                                                                                                            |
| $\theta$   | The volume fraction of the denser phase which is made of the deep eutectic solvent                                                                                                                                   |
| $\phi$     | A constant used to describe the effect of changing $\theta$ on the activity function ratios                                                                                                                          |
| q          | A constant used in equations 7 and 8, this is expressed in % <sup>n</sup> terms The percentage is the % (v/v) of the organic phase which is the extraction agent.                                                    |
| Q          | An alternative to U for use when the chloride concentration in the denser phase is constant, in addition to the terms hidden inside Q it contains the chloride concentration in the denser phase.                    |
| v          | The percentage (v/v) of the extraction agent in the organic phase                                                                                                                                                    |
| $\psi$     | An alternative to $\phi$ used in the paper in PCCP                                                                                                                                                                   |
| $\lambda$  | Partition constant. Defined as the activity of a species in the organic phase divided by the activity in the aqueous phase. Normally used in this paper for describing the partition of an metal extractant complex. |
| C          | An alternative to U where the constant is placed in a different part of an equation                                                                                                                                  |
